# Supplementary material for: Acute and repeated impact of sweeteners and sweetness enhancers in solid and semi-solid foods on appetite: protocol for a multicentre, cross-over, RCT in people with overweight/obesity – the SWEET Project
Source: PubMed Central journal article supplement — BMJ Open. 2022 Dec 23;12(12):e063903. doi: 10.1136/bmjopen-2022-063903 (PMC9791453; doi:10.1136/bmjopen-2022-063903), 2022-12-23
Supplement: bmjopen-2022-063903.draft_revisions.pdf [file bmjopen-2022-063903.draft_revisions.pdf]

# BMJ Open

BMJ Open is committed to open peer review. As part of this commitment we make the peer review history of every article we publish publicly available.

When an article is published we post the peer reviewers' comments and the authors' responses online. We also post the versions of the paper that were used during peer review. These are the versions that the peer review comments apply to.

The versions of the paper that follow are the versions that were submitted during the peer review process. They are not the versions of record or the final published versions. They should not be cited or distributed as the published version of this manuscript.

BMJ Open is an open access journal and the full, final, typeset and author-corrected version of record of the manuscript is available on our site with no access controls, subscription charges or pay-per-view fees (<http://bmjopen.bmj.com>).

If you have any questions on BMJ Open's open peer review process please email [info.bmjopen@bmj.com](mailto:info.bmjopen@bmj.com)

# BMJ Open

**Protocol for acute and repeated dose impact of sweeteners and sweetness enhancers on appetite-related behaviour, physiology, and health: a multi-centre, double-blind, cross-over, randomised, controlled trial in people with overweight/obesity. The SWEET project.**

|                               |                                                                                                                                                                                                                                                                                                                                                                                                                                                                                                                                                                                                                                                                                                                                                                                                                                                                                                                                                                                                                                                                                                                                                                                                                                                                                                                                                                                                                                                                                                                                                                                                                                                                                                                                                                                                                                                                                                                                                                                                    |
|-------------------------------|----------------------------------------------------------------------------------------------------------------------------------------------------------------------------------------------------------------------------------------------------------------------------------------------------------------------------------------------------------------------------------------------------------------------------------------------------------------------------------------------------------------------------------------------------------------------------------------------------------------------------------------------------------------------------------------------------------------------------------------------------------------------------------------------------------------------------------------------------------------------------------------------------------------------------------------------------------------------------------------------------------------------------------------------------------------------------------------------------------------------------------------------------------------------------------------------------------------------------------------------------------------------------------------------------------------------------------------------------------------------------------------------------------------------------------------------------------------------------------------------------------------------------------------------------------------------------------------------------------------------------------------------------------------------------------------------------------------------------------------------------------------------------------------------------------------------------------------------------------------------------------------------------------------------------------------------------------------------------------------------------|
| Journal:                      | <i>BMJ Open</i>                                                                                                                                                                                                                                                                                                                                                                                                                                                                                                                                                                                                                                                                                                                                                                                                                                                                                                                                                                                                                                                                                                                                                                                                                                                                                                                                                                                                                                                                                                                                                                                                                                                                                                                                                                                                                                                                                                                                                                                    |
| Manuscript ID                 | bmjopen-2022-063903                                                                                                                                                                                                                                                                                                                                                                                                                                                                                                                                                                                                                                                                                                                                                                                                                                                                                                                                                                                                                                                                                                                                                                                                                                                                                                                                                                                                                                                                                                                                                                                                                                                                                                                                                                                                                                                                                                                                                                                |
| Article Type:                 | Protocol                                                                                                                                                                                                                                                                                                                                                                                                                                                                                                                                                                                                                                                                                                                                                                                                                                                                                                                                                                                                                                                                                                                                                                                                                                                                                                                                                                                                                                                                                                                                                                                                                                                                                                                                                                                                                                                                                                                                                                                           |
| Date Submitted by the Author: | 21-Apr-2022                                                                                                                                                                                                                                                                                                                                                                                                                                                                                                                                                                                                                                                                                                                                                                                                                                                                                                                                                                                                                                                                                                                                                                                                                                                                                                                                                                                                                                                                                                                                                                                                                                                                                                                                                                                                                                                                                                                                                                                        |
| Complete List of Authors:     | Gibbons, Catherine; University of Leeds, School of Psychology<br>O'Hara, Beverley; University of Leeds, School of Psychology<br>O'Connor, Dominic; University of Leeds, School of Psychology<br>Hardman, Charlotte; University of Liverpool, Institute of Population Health<br>Wilton, Moon; University of Liverpool, Institute of Population Health<br>Harrold, Joanne; University of Liverpool, Institute of Population Health<br>Almiron-Roig, Eva; University of Navarra, Centre for Nutrition Research; Navarra Institute for Health Research, IdiSNA<br>Navas-Carretero, Santiago; University of Navarra, Centre for Nutrition Research; Navarra Institute for Health Research, IdiSNA<br>Hodgkins, Charo ; University of Surrey, Food, Consumer Behaviour and Health Research Centre, School of Psychology<br>Nazare, Julie Anne; Rhône-Alpes Research Centre for Human Nutrition<br>Alligier, Maud; Rhône-Alpes Research Centre for Human Nutrition; French Obesity Research Centre of France<br>Martínez, Jose; University of Navarra, Centre for Nutrition Research; IMDEA, Precision Nutrition Program<br>Scott, Corey; Cargill Inc<br>Kjølbaek, Louise; University of Copenhagen, Department of Nutrition, Exercise and Sports<br>Normand, Mie; University of Copenhagen, Department of Nutrition, Exercise and Sports<br>Rannou, Cécile; Oniris, UMR CNRS GEPEA 6144<br>Blaak, Ellen; Maastricht University, School of Nutrition and Translational Research in Metabolism<br>Feskens, Edith; Wageningen University, Division of Human Nutrition and Health<br>Moshoyiannis, Hariklia; Bioaitriki S. A, International Reference Laboratory Services<br>Raben, Anne; University of Copenhagen, Department of Nutrition, Exercise & Sports; Steno Diabetes Center Copenhagen, Clinical Research<br>Halford, Jason; University of Leeds, School of Psychology<br>Beaulieu, Kristine; University of Leeds, School of Psychology<br>Finlayson, G; University of Leeds, School of Psychology |
| Keywords:                     | Protocols & guidelines < HEALTH SERVICES ADMINISTRATION &                                                                                                                                                                                                                                                                                                                                                                                                                                                                                                                                                                                                                                                                                                                                                                                                                                                                                                                                                                                                                                                                                                                                                                                                                                                                                                                                                                                                                                                                                                                                                                                                                                                                                                                                                                                                                                                                                                                                          |

1  
2  
3  
4  
5  
6  
7  
8  
9  
10  
11  
12  
13  
14  
15  
16  
17  
18  
19  
20  
21  
22  
23  
24  
25  
26  
27  
28  
29  
30  
31  
32  
33  
34  
35  
36  
37  
38  
39  
40  
41  
42  
43  
44  
45  
46  
47  
48  
49  
50  
51  
52  
53  
54  
55  
56  
57  
58  
59  
60

|  |                                                  |
|--|--------------------------------------------------|
|  | MANAGEMENT, PUBLIC HEALTH, NUTRITION & DIETETICS |
|  |                                                  |

SCHOLARONE™  
Manuscripts

1  
2  
3 1 **Protocol for acute and repeated dose impact of sweeteners and sweetness enhancers on**  
4 **appetite-related behaviour, physiology, and health: a multi-centre, double-blind, cross-**  
5 **over, randomised, controlled trial in people with overweight/obesity. The SWEET**  
6 **project.**  
7  
8  
9  
10

11 **Authors:** Catherine Gibbons<sup>1\*</sup>, Beverley O’Hara<sup>1\*</sup>, Dominic O’Connor<sup>1</sup>, Charlotte A  
12 Hardman<sup>2</sup>, Moon M Wilton<sup>2</sup>, Joanne A Harrold<sup>2</sup>, Eva Almiron-Roig<sup>3,4</sup>, Santiago Navas-  
13 Carretero<sup>3,4</sup>, Charo E Hodgkins<sup>5</sup>, Julie-Anne Nazare<sup>6</sup>, Maud Alligier<sup>6,7</sup>, J Alfredo Martinez<sup>3,8</sup>,  
14 Corey Scott<sup>9</sup>, Louise Kjølbaek<sup>10</sup>, Mie Normand<sup>10</sup>, Cécile Rannou<sup>11</sup>, Ellen E Blaak<sup>12</sup>, Edith J  
15 M Feskens<sup>13</sup>, Hariklia Moshoyiannis<sup>14</sup>, Anne Raben<sup>10,15</sup>, Jason C G Halford<sup>1</sup>, Kristine  
16 Beaulieu<sup>1</sup>, Graham Finlayson<sup>1</sup>  
17  
18  
19  
20  
21  
22  
23

24 \*Contributed equally.

25 Correspondence to Dr Catherine Gibbons; c.gibbons@leeds.ac.uk  
26  
27  
28

29 **Affiliations:**

30 <sup>1</sup>School of Psychology, Faculty of Medicine & Health, University of Leeds, UK

31 <sup>2</sup>Department of Psychology, Institute of Population Health, University of Liverpool, UK

32 <sup>3</sup>Centre for Nutrition Research, University of Navarra, Spain

33 <sup>4</sup>Navarra Institute for Health Research, IdiSNA, Pamplona, Spain

34 <sup>5</sup>Food, Consumer Behaviour and Health Research Centre, School of Psychology, University  
35 of Surrey, UK

36 <sup>6</sup>Human Nutrition Research Center Rhône-Alpes, Lyon 1 Claude Bernard University, France

37 <sup>7</sup>French Obesity Research Centre of Excellence, France

38 <sup>8</sup>Precision Nutrition Program, IMDEA, Madrid, Spain

39 <sup>9</sup>Core Research and Development, Cargill, Inc, USA

40 <sup>10</sup>Department of Nutrition, Exercise and Sports, University of Copenhagen, Denmark

41 <sup>11</sup>UMR CNRS GEPEA 6144, Oniris, France

42 <sup>12</sup>School of Nutrition and Translational Research in Metabolism, University of Maastricht,  
43 The Netherlands

44 <sup>13</sup>Division of Human Nutrition and Health, Wageningen University, Wageningen,  
45 Netherlands

46 <sup>14</sup>International Reference Laboratory Services, Bioiatriki S.A., Athens, Greece  
47  
48  
49  
50  
51  
52  
53  
54  
55  
56  
57  
58  
59  
60

1  
2  
3  
4  
5  
6  
7  
8  
9  
10  
11  
12  
13  
14  
15  
16  
17  
18  
19  
20  
21  
22  
23  
24  
25  
26  
27  
28  
29  
30  
31  
32  
33  
34  
35  
36  
37  
38  
39  
40  
41  
42  
43  
44  
45  
46  
47  
48  
49  
50  
51  
52  
53  
54  
55  
56  
57  
58  
59  
60

34 <sup>15</sup>Clinical Research, Copenhagen University Hospital – Steno Diabetes Center Copenhagen,  
35 Herlev, Denmark

36  
37  
38

39 **Word Count: 3874**

For peer review only

## 40 Abstract

41 **Introduction:** Intake of free sugars in European countries is high and attempts to reduce  
42 sugar intake have been mostly ineffective. Sweeteners and sweetness enhancers (S&SEs) can  
43 maintain sweet taste in the absence of energy, but little is known about the impact of acute  
44 and repeated consumption of these products on appetite. This study aims to evaluate the  
45 effect of acute and repeated consumption of 2 individual S&SEs and 2 S&SE blends in semi-  
46 solid and solid foods on appetite and related behavioural, metabolic and health outcomes.

47 **Methods and Analysis:** A work package of the SWEET project, this study consists of 5  
48 double-blind randomised cross-over trials which will be carried out at 5 sites across 4  
49 European countries, aiming to have n=213. Five food matrices will be tested across 3  
50 formulations (sucrose-sweetened control versus 2 reformulated products with S&SE blends  
51 and no added sugar). Participants (body mass index (BMI) 25-35 kg/m<sup>2</sup>; aged 18-60 years)  
52 will consume each formulation for 14 days. The primary endpoint is composite appetite score  
53 (hunger, inverse of fullness, desire to eat and prospective food consumption) over a 3-hour  
54 postprandial incremental area under the curve during clinical investigation days on day 1 and  
55 14.

56 **Ethics and dissemination:** The trial will be approved by national ethical committees before  
57 starting recruitment and will be conducted in accordance with the Declaration of Helsinki.  
58 Results will be published in international peer-reviewed open access scientific journals.  
59 Research data from the trial will be deposited in an open access online research data archive.

60 **Trial registration number:** Clinicaltrials.gov: NCT04633681

## 62 Strengths and Limitations of this study:

- 63 • The trial is the first of its kind to investigate the effects of acute and repeated exposure to  
64 2 individual S&SE and 2 S&SE blends in 5 different sweet food products across a variety  
65 of matrices including bakery (cakes and biscuits), dairy (yoghurt), confectionary  
66 (chocolate) and breakfast cereal.
- 67 • This trial includes a large range of outcomes across behaviour, physiology, and health  
68 from persons living in Northern, Central and Southern Europe.
- 69 • The COVID-19 pandemic resulted in changes to the design of the studies in the trial.  
70 Originally, all products were to be tested across 2 sites, but the reduced time frame means  
71 this is not possible for some products.

- 1  
2  
3 72 • Due to COVID-19 disruptions the number of participants in 2 of the 5 studies will be  
4 73 reduced. Blood samples will not be taken in one of these smaller studies. Outcomes will  
5 74 be reported descriptively in these 2 studies where appropriate.  
6  
7 75  
8  
9

## 10 76 **BACKGROUND AND RATIONALE**

11 77 The global increase in the prevalence of obesity and its associated diseases is driven by a  
12 78 range of internal factors, involving genetic, behavioural, and metabolic determinants along  
13 79 with permissive external factors from the physical, social, and political environment (1). Two  
14 80 of the main behavioural drivers involve a diet too rich in energy and lack of sufficient  
15 81 physical activity. Free sugar intake (derived from sugar added to foods and beverages by the  
16 82 manufacturer or consumer) is one nutritional component that has gained focus because of its  
17 83 low nutritional value (lack of vitamins, minerals or fibre) and its potential to add to the  
18 84 overall energy density of diets, facilitating weight gain (2). In 2015, the World Health  
19 85 Organisation (WHO) published a report with a specific focus on sugar intake and strongly  
20 86 recommended that free sugar intake should constitute <10 % of total daily energy intake  
21 87 (E%) and preferably <5 E% as a conditional recommendation (2). This is a recommendation  
22 88 that is largely unaddressed in Europe (3). The replacement of free sugars with sweeteners and  
23 89 sweetness enhancers (S&SEs) in food products is one method to reduce sugar intake while  
24 90 maintaining acceptance and palatability of the diet. S&SEs have increasingly been employed  
25 91 over recent years to reduce the energy and sugar content of foods; however, their impact on  
26 92 appetite- and health-related outcomes is somewhat unclear (4).  
27  
28  
29  
30  
31  
32  
33  
34  
35  
36  
37  
38  
39  
40

41 94 The effect of S&SEs on appetite is difficult to summarise due to the number of S&SEs  
42 95 available and the different types of studies and comparisons used. It is likely that different  
43 96 S&SE will have different modes of action and findings in one S&SE does not necessarily  
44 97 translate to all S&SEs. A recent review comparing different S&SEs suggests that some have  
45 98 the potential to enhance appetite, but these effects do not follow through to subsequent  
46 99 energy intake (4). A recent meta-analysis detailed the impact of no- or low-energy sweetened  
50 100 preloads compared to conventionally sweetened preloads on *ad libitum* energy intake. They  
51 101 concluded that similar effects on energy intake were seen due to only partial compensation  
52 102 being evident (although total energy intake was lower in the no- or low-energy sweetener)  
53 103 (5). Furthermore, recent studies have highlighted that S&SEs may reduce sweet food  
54 104 cravings and therefore reduce sugar intake (6) appetite and energy intake (7). Overall, there is  
55 105 currently insufficient evidence to make a clear conclusion about the effect of S&SEs on  
56  
57  
58  
59  
60

1  
2  
3 106 appetite and energy intake. This is particularly true when discounting beverage studies, as  
4  
5 107 there is a lack of information regarding S&SEs in semi-solid and solid foods. Furthermore, it  
6  
7 108 should be acknowledged that differences between acute and longer-term effects of S&SEs  
8  
9 109 may not be the same (8).

10  
11 110

12 111 One of the reasons for the current partial understanding of the appetitive and metabolic  
13  
14 112 effects of S&SEs in humans is that different S&SEs are commonly assumed to have similar  
15  
16 113 behavioural effects (4, 9, 10). Only recently, one 12-week investigation of 4 distinct S&SEs  
17  
18 114 reported directionally dissimilar effects of saccharin compared to sucralose on body weight  
19  
20 115 (11). Indeed, the 11 S&SEs that are currently approved for use in the EU are chemically  
21  
22 116 heterogeneous and absorbed, metabolised, and excreted differently (12). Furthermore, most  
23  
24 117 investigations of the relationship between S&SE intake and health outcomes have used  
25  
26 118 beverages as the vehicle (13) ; these have recently been reviewed (14). Since the amount of  
27  
28 119 S&SEs in the food supply is increasing in response to consumer demand (15) and policy  
29  
30 120 (e.g., ‘sugar taxes’(16, 17); EU initiatives (18, 19)), there is a pressing need to examine the  
31  
32 121 appetite-related behavioural and metabolic consequences of consuming S&SEs particularly in  
33  
34 122 semi-solid and solid food matrices.

### 35 36 123 **AIMS AND OBJECTIVES**

37 124 The main objective of this study is to evaluate the acute (1-day) and repeated (14-day) effects  
38  
39 125 of 2 individual S&SEs and 2 S&SE blends in reformulated reduced or no added sugar food  
40  
41 126 products (using 2 modulations of S&SEs per matrix) on appetite and related behavioural,  
42  
43 127 metabolic and health outcomes in adult men and women with overweight or obesity.

44 128 The hypotheses are:

45  
46 129 **H<sub>1</sub>** Consumption of no added/reduced sugar products reformulated with S&SEs will result in  
47  
48 130 an altered incremental area under the curve (iAUC) appetite score, compared with the  
49  
50 131 sucrose-sweetened control product after repeated compared with acute consumption.

51 132

52  
53 133 **H<sub>2</sub>** There will be differences between the no added/reduced sugar and sucrose-sweetened  
54  
55 134 formulations on behavioural (e.g., food reward and preferences, food cravings, self-reported  
56  
57 135 energy intake), metabolic (satiety peptides, glycaemic and lipaemic response) and health-  
58  
59 136 related (liver function and gastrointestinal (GI) side effects) outcomes.

60 137



## 138 TRIAL DESIGN

139 This study is part of the SWEET project (Sweeteners and sweetness enhancers: Impact on  
140 health, obesity, safety and sustainability -Master protocol WP2 Phase 2 Version 2.6  
141 29-MARCH-2022). It is a multicentre double-blind, randomised cross-over trial conducted  
142 across 5 intervention sites in 4 countries, with 3 product formulations (sucrose-sweetened  
143 control vs 2 individual S&SEs or S&SE blends) over 5 intervention product types (cake,  
144 biscuits, yoghurt, chocolate, and breakfast cereal) aiming for a total of 213 completers:  
145 Biscuit matrix n=52; yoghurt matrix n=54; chocolate matrix n=54; cereal matrix n=30; cake  
146 matrix n=24. The protocol is reported as per the SPIRIT reporting guidelines (20).

147

### 148 *Sample Size Determination*

149 The following calculations apply to the studies involving biscuit, yoghurt and chocolate  
150 matrices:

151 Primary outcome: Power calculations showed that to detect a minimum difference of 8 mm in  
152 appetite ratings on a 100 mm visual analogue scale (VAS) with 80% power, alpha 0.05, and  
153 based on a published within-subject SD of 14.4 mm in VAS measures (21), an overall sample  
154 of 53 completers (both sexes, same BMI group, across all centres) would be needed (22; p.30)  
155 per matrix.

156 Secondary outcomes:

- 157 • Blood glucose - choosing 6.5 mmol/l as the blood glucose peak in the control condition, a  
158 hypothesised 30% reduction for the S&SE conditions (4.55 mmol/L) and based on an  
159 expected SD of 2.0 (23) an effect size ( $d_z$ ) of 0.975 can be calculated using alpha of 0.01  
160 (to account for multiple comparisons) and a two-tailed distribution. With these data the  
161 minimum sample size is of 16 completers.
- 162 • Gut hormones - the minimum sample size for gut hormones was estimated based on values  
163 for the pancreatic polypeptide (PP) (15' peak), according to published data (24). These  
164 suggested a minimum of 30 completers per matrix were needed with 80% power, alpha  
165 0.05 and a strong (0.9) effect size. It was estimated that this sample size would also suffice  
166 to detect differences in plasma ghrelin in participants with overweight (25).

167 Due to the impact to the trial brought about by the COVID-19 pandemic, the cake and breakfast  
168 cereal studies had to be scaled down and the study using cakes will no longer include blood

169 samples. The primary outcome will be reported as descriptive statistics only in these 2 studies  
170 where appropriate and reflected in the study registration and protocol.

## 171 **STUDY SETTING**

172 This trial is conducted across 5 intervention sites in 4 countries across 3 regions of Europe.  
173 Western Europe: Leeds (University of Leeds, UK); Liverpool (University of Liverpool, UK);  
174 Lyon (Centre de Recherche en Nutrition Humaine Rhône Alpes, France). Northern Europe:  
175 Copenhagen (University of Copenhagen, Denmark). Southern Europe: Pamplona (University  
176 of Navarra, Spain). University's of Leeds and Navarra are the leaders of this work package,  
177 whilst University of Liverpool is the co-ordinating centre of the SWEET project in its  
178 entirety.

## 179 **PATIENT AND PUBLIC INVOLVEMENT**

180 During the study, research staff discuss with participants about their experiences of the  
181 clinical investigation days, examinations, participant information and written materials, etc.  
182 with the aim to understand and improve participants' experiences in current and future  
183 studies of this nature. This is also captured in an end of study survey.

## 184 **ELIGIBILITY CRITERIA**

185 Male and female adults aged 18-60 years, with a BMI 25-35 kg/m<sup>2</sup> are eligible. Participants  
186 are required to regularly consume sugar-containing foods and willing to consume sugar and  
187 sweetened food products. During screening, they must have an Eating Attitudes Test (EAT-  
188 26) (26) score <20 and a short sweet food frequency questionnaire score  $\geq 3$  of 11, in addition  
189 to rating the control product as  $\geq 40\%$  on a 100-point liking VAS during the taste test and be  
190 willing to consume the product during the duration of the trial. All exclusion criteria are  
191 listed in **Supplemental Material 1**.

## 193 **INTERVENTION**

194 Each trial will begin with an initial exposure to one of the 3 assigned product formulations  
195 under controlled laboratory conditions (clinical investigation day, CIDs 1, 3, 5 – exposure  
196 day 1), followed by repeated daily consumption of the same product at home for 12 ( $\pm 2$   
197 days) and a final exposure in the laboratory on day 14 ( $\pm 2$  days) under identical conditions as  
198 the first exposure (CIDs 2, 4, 6 – exposure day 14), resulting in all participants completing

1  
2  
3 199 the 3 products formulations in a Latin square design (see Figure 1). CIDs 2 and 4 will be  
4  
5 200 followed by a wash out period of 14-21 days between formulations. During the at-home  
6  
7 201 periods, participants will consume a portion of the product at a time and place they choose  
8  
9 202 using a substitution strategy for similar energy/sweetness foods in their habitual diet. This  
10  
11 203 strategy is supported by advice and agreement from the research officer/dietitian. Compliance  
12  
13 204 will be monitored by an intervention booklet completed daily and by return of empty food  
14  
15 205 packaging. All food products are provided in the same blinded container/wrapping. The study  
16  
17 206 duration for each participant will be a minimum of 70 days (plus 7-14 days allowance for  
18  
19 207 extended washout to aid scheduling of CIDs).

208

### 209 **Recruitment and Screening**

210 1) Participants will be recruited via a variety of routes e.g., study databases, webpages,  
211 social media, posters, and flyers. Potential participants will be pre-screened using an  
212 online or telephonic pre-screening questionnaire in accordance with the inclusion and  
213 exclusion criteria. Candidates passing pre-screening will be invited to attend an  
214 information session, either online or in-person, where they will be given detailed  
215 information about the study and invited to participate in a Q&A session. Candidates  
216 who wish to participate in the study will provide written informed consent and sign a  
217 general data protection regulation (GDPR) form before being fully screened. The  
218 screening session will be performed in-person or online, and will consist of  
219 anthropometric measurements (height, weight, waist and hip circumference; all  
220 confirmed in-person at CID1 for participants being screened online); eligibility  
221 questionnaires (EAT-26 (26) and short sweet food frequency questionnaire); baseline  
222 questionnaires (A socio-demographic questionnaire, a questionnaire to assess habitual  
223 sweet food consumption, including regular and S&SE sweet foods (SWITCH sweet  
224 food frequency questionnaire (SWFFQ)) (27), a questionnaire to assess habitual  
225 physical activity (International Physical Activity Questionnaire (IPAQ)) (28) and a  
226 consumer perspective questionnaire); an eligibility taste test of the control  
227 intervention product. Candidates who pass the screening session will be enrolled into  
228 the study.

229

### 230 **Randomisation and blinding**

231 A Latin square design (6 treatment orders) will be used to randomly allocate product  
232 sequence into blocks of 6, as shown in Figure 1. The person responsible for generating the

233 sequences for all sites will not have any study related tasks e.g., inclusion or examination of  
234 participants. Each sequence will be stratified by sex (female/male) and age group (18-45  
235 years/46-60 years). When feasible, a female/male ratio of minimum 60/40 was also  
236 considered to reflect the target population characteristics.

237 Blinding of the intervention products (reformulated and control products) will be done by the  
238 manufacturers. As such, blinding of the research and central laboratory staff will take place  
239 allowing for a double-blind intervention. Moreover, the statistical analyses of the main  
240 outcome variable will be done without breaking the intervention product-assignment code  
241 before the analyses are finalised.

242

243

244 **[Figure 1]**

245

### 246 **Clinical investigation days**

247 Prior to each CID, participants will be asked to consume a similar evening meal at the same  
248 time, before fasting for a minimum of 12 hours and a maximum of 15 hours. High intensity  
249 physical activity, alcohol, and coffee will not be allowed for 12 hours before arriving to the  
250 laboratory. Two glasses, approximately 500 mL, of non-carbonated water will be allowed  
251 during the fasting period. Participants will provide a spot urine sample collected max 24  
252 hours before each CID and will be analysed for the presence of specific S&SEs.

253

254 The CID procedures are outlined in Figure 2. CID start times will be scheduled in the  
255 morning between 8.00 am and 10.30 am and participants will start all 6 CIDs at the same  
256 time. Participants will complete a protocol compliance questionnaire to verify the above  
257 requirements regarding diet, physical activity, etc. If compliance has been breached, staff will  
258 reschedule the CID (within the maximum 14 days allowed, otherwise a protocol deviation  
259 will be recorded). If compliance has been achieved, participants will then fill in the Control  
260 of Eating Questionnaire (CoEQ)(29) to assess cravings over the last 7 days, followed by a  
261 body weight measurement. Participants will consume 200 mL of water before having an  
262 intravenous cannula inserted into an antecubital vein by qualified personnel. A baseline  
263 fasting blood sample will be taken 15 minutes after insertion of the cannula. Once the fasting  
264 sample has been taken, participants will complete fasting subjective appetite ratings for  
265 hunger, fullness, thirst, desire to eat, prospective intake, nausea, bloating, appetite for

1  
2  
3 266 something savoury and for something sweet on a validated 100-point VAS accessed via a PC  
4  
5 267 or a tablet (30, 31). These measures will be completed on an electronic Questionnaire  
6  
7 268 Delivery Platform (QDP), using separate screens for each VAS. Next, food reward will be  
8  
9 269 measured using a culturally adapted version of the Leeds Food Preference Questionnaire  
10  
11 270 (LFPQ)(32) on a computer desktop. Appetite sensations measured by VAS will be repeated  
12  
13 271 after the LFPQ and before the researcher brings the blinded intervention product served with  
14  
15 272 200 mL of water. The participant will be instructed to take one bite, then answer questions  
16  
17 273 regarding sensory-specific satiety and expected satiety by VAS (33, 34). The participant will  
18  
19 274 be asked to consume the rest of the product over a period of 5-10 minutes, depending on the  
20  
21 275 time required to consume the matrix and asked to complete a set of appetite sensation  
22  
23 276 questions by VAS at 10 min, followed by blood samples at 7-10 and 12-15 min to capture  
24  
25 277 peak PP response (35) (yoghurt will be consumed faster than other products therefore blood  
26  
27 278 samples will be taken earlier for this matrix). VAS for assessment of appetite sensation will  
28  
29 279 then be taken at 20, 30, 45, 60, 120 and 180 min with blood samples taken after VAS at 30,  
30  
31 280 60 and 120 min. The LFPQ will be repeated in the fed state after the 20-min VAS. In  
32  
33 281 between measurements, participants will remain seated in a quiet area, free from food-related  
34  
35 282 sensory stimuli and read/listen to music/use a computer (provided there is no material with  
36  
37 283 reference to food/drink). Once the 180-min appetite sensation questions by VAS is complete  
38  
39 284 the participant will be offered water or a snack before leaving the laboratory. Participants will  
40  
41 285 be reminded about the consumption of the products at home and that they will receive a  
42  
43 286 phone call the next day to complete a 24-hour diet recall and report any GI symptoms.  
44  
45 287 Following the end of the trial, participants will be debriefed if requested and offered the  
46  
47 288 chance to complete a survey about the conduct of the study.  
48  
49 289

49  
50 290  
51 291 [Figure 2]  
52 292  
53 293

### 294 **Intervention products**

51 295 There will be 1 control product (sucrose-containing manufactured products) and 2 no  
52  
53 296 added/reduced sugar reformulated products based on the same food matrix - including 2  
54  
55 297 modulations of S&SE content (inclusion as individual S&SE or S&SE blends). The  
56  
57 298 reformulated products have a target of  $\geq 30\%$  reduction in energy and/or sugar to achieve the  
58  
59 299 status of 'reduced sugar' by EU regulation No 1047/2012. This will not be possible in all  
60  
300 300 products, therefore 'no added sugar' will be applied to products who do not meet the criteria

301 (biscuits and cakes). The control products will range from 305-360 kcal (1286-1516 kJ),  
 302 while the intervention products will range from 242-326 kcal (1013-1368 kJ) (full product  
 303 ingredients in **Supplemental Material 2**). Intervention and control products will be matched  
 304 for sweetness intensity, flavour and physical appearance.

305

306 The 2 individual S&SEs tested are Neotame and Stevia Rebaudioside M and the 2 S&SE  
 307 blends are Sucralose/Acesulfame K blend and Mogroside V/Stevia Rebaudioside M blend.

308

### 309 Data Collection and Outcomes

310 Table 1 Details at which time point(s) data are collected at the CID.

311

312 **Table 1:** Data Collection and Timepoints for each CID

|                              |                                                                                               | Baseline<br>or 0' (fasting) | 10' | 15' | 20' | 30' | 45' | 60' | 120' | 180' | Next<br>day |
|------------------------------|-----------------------------------------------------------------------------------------------|-----------------------------|-----|-----|-----|-----|-----|-----|------|------|-------------|
| <b>Primary endpoint</b>      | Subjective appetite (VAS for hunger, desire to eat, fullness, prospective food consumption)   | X                           | X   |     | X   | X   | X   | X   | X    | X    |             |
| <b>Behavioural endpoints</b> | Food preference & reward (LFPQ)                                                               | X                           |     |     | X   |     |     |     |      |      |             |
|                              | Food cravings (CoEQ)                                                                          | X                           |     |     |     |     |     |     |      |      |             |
|                              | Energy intake (24-hour dietary recall)                                                        |                             |     |     |     |     |     |     |      |      | X           |
|                              | Expected satiety                                                                              | X (1 bite)                  |     |     |     |     |     |     |      |      |             |
|                              | Sensory-specific satiety                                                                      | X (1 bite)                  | X   |     |     |     |     |     |      |      |             |
|                              | Other appetite ratings (e.g., thirst, nausea, bloating, appetite for something sweet/savoury) | X                           | X   |     | X   |     | X   | X   | X    | X    |             |
| <b>Metabolic endpoints</b>   | Glucose and insulin                                                                           | X                           | X   | X   |     | X   |     | X   | X    |      |             |
|                              | Pancreatic polypeptide (PP)*                                                                  | X                           | X   | X   |     | X   |     |     |      |      |             |
|                              | GLP-1 and ghrelin                                                                             | X                           |     |     |     | X   |     | X   |      |      |             |
|                              | Lipaemia (triglycerides, total cholesterol, HDL-cholesterol, and LDL-cholesterol)             | X                           |     |     |     | X   |     | X   | X    |      |             |
| <b>Health endpoints</b>      | Liver function (ALT, AST, GGT, FL index, TyG index)                                           | X                           |     |     |     |     |     |     | X    |      |             |
|                              | HbA1c                                                                                         | CID1 & 6                    |     |     |     |     |     |     |      |      |             |
|                              | 24-hour GI side effects (self-report)                                                         |                             |     |     |     |     |     |     |      |      | X           |

313 \* Timepoints for PP are earlier for yoghurt study

314 *Abbreviations:* ALT - alanine transaminase, AST – aspartate transaminase, GGT - gamma-  
 315 glutamyltransferase, FL index - fatty liver index, TyG index - triglycerides and glucose index  
 316 VAS - visual analogue scale, LFPQ - Leeds Food Preference Questionnaire, CoEQ - Control  
 317 of Eating questionnaire, GLP-1- Glucagon-like peptide 1, HDL - High density lipoprotein,  
 318 LDL - Low density lipoprotein, HbA1c - Haemoglobin A1c, GI - Gastrointestinal, CID -  
 319 Clinical Investigation Day.



320

**321 Primary Outcome**

322 This trial has one primary outcome which is the iAUC for the 180-minute composite appetite  
323 score based on hunger, fullness (reverse scored), desire to eat and prospective food  
324 consumption (36). These subjective appetite ratings will be measured throughout the CIDs  
325 using VAS on the QDP. The trapezoid method will be used for the calculation of iAUC (37).

326

**327 Secondary Outcomes****328 Food preference and reward**

329 Food preference and food reward will be measured at all CIDs using the LFPQ (32). Changes  
330 will be determined by comparing the relative preference/food choice, explicit liking and  
331 implicit wanting for high-fat sweet, low-fat sweet, high-fat savoury and low-fat savoury  
332 foods, and fat/sweet appeal bias scores in the fed and hungry states between the reformulated  
333 and control products.

334

**335 Food cravings**

336 Food cravings will be determined at all CIDs by craving control, craving for sweet and  
337 savoury scores from the CoEQ (29), which is a 21-item questionnaire with responses  
338 recorded on a 100-point VAS (1 item allows for text response).

339

**340 Energy intake**

341 Energy intake will be measured by a 24-hour dietary recall (using the multiple pass method  
342 (38)), which will be conducted by a trained dietitian or research staff over the telephone.  
343 Participants will be asked to recall all food and drink consumed during the 24-hour period  
344 since leaving the laboratory. Participants will receive training on reporting food portions  
345 using the Australian Health Survey Food Model Booklet (39) or similar culturally adapted  
346 resources.

347 Compensatory eating behaviour will be determined from the analysis of the 24-hour dietary  
348 interview data using energy intakes calculated with national nutritional software. The following  
349 variables will be considered: 1) Energy and macronutrient distribution and 2) Percent energy  
350 compensation (%EC), defined as the adjustment of energy intake (EI) provoked by the  
351 intervention products (40), (see **Supplemental Material 3** for further information).

352

**353 Expected satiety and sensory specific satiety**

1  
2  
3 354 Expected satiety will be measured by the Expected Satiety (ESAT) questionnaire (33, 41) and  
4  
5 355 sensory specific satiety will be measured by the Sensory-Specific Satiety (SSS) questionnaire  
6  
7 356 (34) after one bite and full consumption (10') of the product. Responses to both  
8  
9 357 questionnaires are recorded on a 100-point VAS completed on the QDP. ESAT and SSS will  
10  
11 358 be recorded on all CIDs (see **Supplemental Material 4** for details of each VAS).  
12  
13 359

### 14 360 *Other behavioural ratings*

15 361 Subjective ratings of thirst, nausea, bloating, appetite for sweet and appetite for savoury will  
16  
17 362 be recorded using 100-point VAS on the QDP regularly throughout the CIDs (Table 1).  
18  
19 363

### 20 364 *Biochemical measures*

21  
22 365 Blood for plasma analyses will be centrifuged at 1500 g at 4°C for 10 minutes immediately  
23  
24 366 after being collected. Blood for serum analyses will be left to clot for 30-60 minutes before  
25  
26 367 being centrifuged. Whole blood samples for DNA and HbA1c will be frozen immediately  
27  
28 368 after collection. Plasma and serum aliquots will be stored at -80°C until shipment for  
29  
30 369 analyses to Bioaitriki Laboratories (central lab) in Athens, Greece.  
31  
32 370 Insulin concentrations will be determined by chemiluminescent microparticle immunoassay  
33  
34 371 (CMIA) (Abbott Laboratories) using an Abbott Alinity i automated immunoassay system.  
35  
36 372 Ghrelin, GLP-1 and PP concentrations will be determined by ELISA, using an open  
37  
38 373 automated ELISA system. Haemoglobin A1c will be determined by enzymatic assay  
39  
40 374 (Abbott) which consists of two separate concentration measurements: glycated haemoglobin  
41  
42 375 (HbA1c) and total haemoglobin. The two concentrations are used to determine the percent  
43  
44 376 HbA1c (NGSP units) or the haemoglobin fraction in mmol/mol (IFCC units). Triglycerides  
45  
46 377 will be determined by glycerol phosphate oxidase method (Abbott). Total cholesterol will be  
47  
48 378 determined by enzymatic (oxidase, esterase and peroxidase) analysis (Abbott). Glucose  
49  
50 379 concentrations will be determined by enzymatic (Hexokinase/G-6-PDH) (Abbott). HDL-  
51  
52 380 cholesterol will be determined by an accelerator selective detergent method (Ultra HDL  
53  
54 381 assay, Abbott) and LDL-cholesterol by a selective resolution of LDL-Particles under dye  
55  
56 382 formation method (Direct LDL assay, Abbott). AST and ALT will be determined by  
57  
58 383 enzymatic (NADH (without P-5'-P)) assays and GGT by enzymatic, L-Gamma glutamyl-3-  
59  
60 384 carboxy-4-nitroanilide substrate (Abbott). All biochemistry parameters will be analysed by an  
61  
62 385 Abbott Alinity c analyser. Fatty liver index and triglyceride glucose index will be calculated  
63  
64 386 according to information provided in **Supplemental Material 5**.  
65  
66 387



### 388 ***Gastrointestinal (GI) side effects***

389 Any reported unusual GI side effects, including abdominal pain/cramps, heartburn, stomach  
390 acid/reflux, nausea, vomiting, abdominal rumbling, bloating, belching, excess gas/wind,  
391 bowel movements, stool type, etc. during the study will be recorded at the phone call the day  
392 after each CID and each day during the at-home intervention in a booklet including the  
393 Bristol Stool Form Scale (42). The GI symptoms check has been based on the validated  
394 Gastrointestinal Symptoms Rating Scale (GSRS) tool (43).

395

### 396 **STATISTICAL ANALYSIS PLAN**

397 Per protocol analysis will include participants that completed all 6 CIDs and had a level of  
398 adherence to the product consumption >80%. The main evaluations for this trial will be to  
399 investigate differences between the intervention products (2 no added/reduced sugar  
400 reformulated S&SE products and 1 sucrose-sweetened control). Where this is not appropriate  
401 for some of the secondary outcomes, descriptive analyses will be used to interpret  
402 differences. Data will be pooled across the split-site (Leeds and Lyon) study using the biscuit  
403 matrix. Data will be presented as means and standard deviation. Outcome variables will be  
404 checked for normality and transformed where necessary. Analyses will include repeated  
405 measures ANOVA or mixed-effects regression models to compare S&SE product conditions  
406 versus control in a within-subjects design. Covariates (age, sex, BMI, fasting appetite levels,  
407 intervention site, treatment order, adverse events and medication changes) will be adjusted  
408 for where necessary (e.g., if they correlate with other variables). Pearson's correlations will  
409 be used to explore relationships between variables. Adjustment for multiple comparisons will  
410 be applied where necessary. The American Statistical Association's policy statement on p-  
411 values (44) advises that all p-values from specified statistical models be reported along with  
412 point estimates, effect size and confidence intervals to help interpret the compatibility of the  
413 data with the study outcomes, therefore this procedure will be followed. Otherwise, the level  
414 of significance will be set at 0.05.

415

### 416 ***Safety analysis***

417 Information relating to adverse events (including events relating to GI side effects) and  
418 concomitant medication will be tabulated and summarised descriptively.

419

### 420 **ETHICS AND MONITORING**

1  
2  
3 421 Each intervention site will obtain ethical approval from their local ethical committee. All  
4 422 study procedures will be conducted in accordance with the Helsinki Declaration and the study  
5 423 protocol has been registered in a public database (clinicaltrials.gov NTC04633681;  
6  
7  
8 424 **Supplemental Material 6**). To the extent relevant and reasonable International Council for  
9  
10 425 Harmonisation Good Clinical Practice (ICH-GCP) guidelines will be used, and standard  
11  
12 426 operating procedures (SOP) will be developed to facilitate the same performance and  
13  
14 427 compliance with the protocol in each centre. All personal data is handled confidentially and  
15  
16 428 stored in accordance with applicable law, GDPR and local laws (see Appendices). All  
17  
18 429 participants will receive written and oral information about the study and only trained study  
19  
20 430 personnel will provide information, monitor and attest signing of the informed consent form.  
21  
22 431 Where required, monitoring of intervention sites will be performed during the study by the  
23  
24 432 University of Navarra depending on local regulations.  
25  
26 433

#### 434 **TRIAL STATUS**

27 435 Recruitment opened in May 2021 for the trial at the Leeds and Lyon intervention sites using the  
28  
29 436 biscuit matrix, with last participant last visit expected by June 2022. Recruitment for the trial  
30  
31 437 at Lyon using the cake matrix opened in February 2022. The trials at Liverpool, Copenhagen  
32  
33 438 and Pamplona will start recruiting in Spring 2022.  
34  
35 439

#### 440 **PUBLICATION**

37 441 After completion of the study, the findings will be submitted for publication in an  
38  
39 442 international peer-reviewed scientific open access journal and other relevant media. Research  
40  
41 443 data from the trial will be deposited in an open access online research data archive (for  
42  
43 444 example Zenodo).  
44  
45 445

#### 446 **FUNDING AND COMPETING INTERESTS STATEMENT**

48 447 The present study is funded by the Horizon 2020 program: Sweeteners and sweetness  
49  
50 448 enhancers: Impact on health, obesity, safety and sustainability (acronym: SWEET, grant no:  
51  
52 449 774293). The current study was initiated by Prof. G. Finlayson as part of the Work Package 2  
53  
54 450 of the SWEET project. The study receives funding from the Horizon2020 program (9 million  
55  
56 451 Euros) to cover salary for project personnel, supplies, remuneration and dissemination of  
57  
58 452 results. The amount is deposited in a project account subject to public revision. The funder  
59  
60 453 has no role in the study design, interpretation of data or publication of material.

1  
2  
3 454 JCGH, JAH and CAH and are in receipt of research funding from the American Beverage  
4  
5 455 Association. CAH has received honoraria from the International Sweeteners Association.  
6  
7 456 ARA has received honoraria from Unilever and the International Sweeteners Association.  
8  
9 457 CH's research centre provides consultancy to and has received travel funds to present  
10  
11 458 research results from organisations supported by food and drink companies. CS is a paid  
12  
13 459 employee of Cargill, Inc.

## 14 15 460 **AUTHORS' CONTRIBUTIONS**

16  
17  
18  
19 461 **Joint first authors:** Equal contribution from Catherine Gibbons and Beverley O'Hara

20  
21  
22 462 **Responsible Author:** Catherine Gibbons

23  
24  
25 463 **Revisions:** Kristine Beaulieu, Graham Finlayson, Eva Almiron-Roig, Santiago Navas-  
26  
27 464 Carretero, J Alfredo Martinez, Corey Scott, Joanna Harrold, Charlotte Hardman, Moon  
28  
29 465 Wilton, Louise Kjølbaek, Anne Raben and Charo Hodgkins

30  
31  
32 466 **With contribution from SWEET Work Pack 2 Phase 2 study partners:** Cécile Rannou,  
33  
34 467 Julie-Anne Nazare, Maud Alligier, Dominic O'Connor, Ellen E Blaak, Jason Halford, Mie  
35  
36 468 Normand, Edith Feskens and Hariklia Moshoyiannis

## 37 38 39 470 **REFERENCES**

- 40  
41 471 1. Mitchell NS, Catenacci VA, Wyatt HR, Hill JO. Obesity: overview of an epidemic.  
42  
43 472 Psychiatr Clin North Am. 2011;34(4):717-32.
- 44  
45 473 2. World Health Organisation. Guideline: Sugars intake for adults and children. Geneva:  
46  
47 474 World Health Organisation; 2015.
- 47  
48 475 3. Azaïs-Braesco V, Sluik D, Maillot M, Kok F, Moreno LA. A review of total & added  
49  
50 476 sugar intakes and dietary sources in Europe. Nutr J. 2017;16(1):6.
- 51  
52 477 4. O'Connor D, Pang M, Castelnuovo G, Finlayson G, Blaak E, Gibbons C, et al. A  
53  
54 478 rational review on the effects of sweeteners and sweetness enhancers on appetite, food  
55  
56 479 reward and metabolic/adiposity outcomes in adults. Food Funct. 2021;12(2):442-65.
- 56  
57 480 5. Lee HY, Jack M, Poon T, Noori D, Venditti C, Hamamji S, et al. Effects of  
58  
59 481 Unsweetened Preloads and Preloads Sweetened with Caloric or Low-/No-Calorie Sweeteners
- 60

- 1  
2  
3 482 on Subsequent Energy Intakes: A Systematic Review and Meta-Analysis of Controlled  
4 483 Human Intervention Studies. *Adv Nutr.* 2021;12(4):1481-99.
- 5  
6 484 6. Rogers PJ, Ferriday D, Irani B, Hei Hoi JK, England CY, Bajwa KK, et al. Sweet  
7 485 satiation: Acute effects of consumption of sweet drinks on appetite for and intake of sweet  
8 486 and non-sweet foods. *Appetite.* 2020;149:104631.
- 9  
10  
11 487 7. Stamatakis NS, Crooks B, Ahmed A, McLaughlin JT. Effects of the Daily  
12 488 Consumption of Stevia on Glucose Homeostasis, Body Weight, and Energy Intake: A  
13 489 Randomised Open-Label 12-Week Trial in Healthy Adults. *Nutrients.* 2020;12(10).
- 14  
15 490 8. Rogers PJ, Hogenkamp PS, de Graaf C, Higgs S, Lluch A, Ness AR, et al. Does low-  
16 491 energy sweetener consumption affect energy intake and body weight? A systematic review,  
17 492 including meta-analyses, of the evidence from human and animal studies. *International*  
18 493 *journal of obesity (2005).* 2016;40(3):381-94.
- 19  
20 494 9. Hunter SR, Reister EJ, Cheon E, Mattes RD. Low Calorie Sweeteners Differ in Their  
21 495 Physiological Effects in Humans. *Nutrients.* 2019;11(11):2717.
- 22  
23 496 10. Pang MD, Goossens GH, Blaak EE. The Impact of Artificial Sweeteners on Body  
24 497 Weight Control and Glucose Homeostasis. *Frontiers in nutrition.* 2021;7:598340-.
- 25  
26 498 11. Higgins KA, Mattes RD. A randomized controlled trial contrasting the effects of 4  
27 499 low-calorie sweeteners and sucrose on body weight in adults with overweight or obesity. *The*  
28 500 *American Journal of Clinical Nutrition.* 2019;109(5):1288-301.
- 29  
30 501 12. Magnuson BA, Carakostas MC, Moore NH, Poulos SP, Renwick AG. Biological fate  
31 502 of low-calorie sweeteners. *Nutr Rev.* 2016;74(11):670-89.
- 32  
33 503 13. Swithers SE. Artificial sweeteners produce the counterintuitive effect of inducing  
34 504 metabolic derangements. *Trends Endocrinol Metab.* 2013;24(9):431-41.
- 35  
36 505 14. McGlynn ND, Khan TA, Wang L, Zhang R, Chiavaroli L, Au-Yeung F, et al.  
37 506 Association of Low- and No-Calorie Sweetened Beverages as a Replacement for Sugar-  
38 507 Sweetened Beverages With Body Weight and Cardiometabolic Risk: A Systematic Review  
39 508 and Meta-analysis. *JAMA Network Open.* 2022;5(3):e222092-e.
- 40  
41 509 15. Nunn R, Young L, Ni Mhurchu C. Prevalence and Types of Non-Nutritive  
42 510 Sweeteners in the New Zealand Food Supply, 2013 and 2019. *Nutrients.* 2021;13(9).
- 43  
44 511 16. Ng SW, Colchero MA, White M. How should we evaluate sweetened beverage tax  
45 512 policies? A review of worldwide experience. *BMC Public Health.* 2021;21(1):1941.
- 46  
47 513 17. Russell C, Grimes C, Baker P, Sievert K, Lawrence MA. The drivers, trends and  
48 514 dietary impacts of non-nutritive sweeteners in the food supply: a narrative review. *Nutrition*  
49 515 *Research Reviews.* 2021;34(2):185-208.

- 1  
2  
3 516 18. Webster J. Working paper on product reformulation and portion size. Brussels: EU  
4 517 Platform on diet, physical activity and health; 2009.
- 5  
6 518 19. World Health Organisation. Sugar-sweetened beverage taxes in the WHO European  
7 519 Region: success through lessons learned and challenges faced. Copenhagen. WHO Regional  
8 520 Office for Europe Licence: CC BY-NC-SA 3.0 IGO; 2022. Contract No.:  
9 521 WHO/EURO:2022-4781-44544-6381.
- 10  
11 522 20. Chan A-W, Tetzlaff JM, Gøtzsche PC, Altman DG, Mann H, Berlin JA, et al. SPIRIT  
12 523 2013 explanation and elaboration: guidance for protocols of clinical trials. *BMJ : British  
13 524 Medical Journal.* 2013;346:e7586.
- 14  
15 525 21. Almiron-Roig E, Green H, Virgili R, Aeschlimann JM, Moser M, Erkner A.  
16 526 Validation of a new hand-held electronic appetite rating system against the pen and paper  
17 527 method. *Appetite.* 2009;53(3):465-8.
- 18  
19 528 22. Jones BK, M. G. Design and Analysis of Cross-Over Trials. 3rd Edition ed. Boca  
20 529 Raton, Florida: CRC Press; 2015.
- 21  
22 530 23. Green MW, Taylor MA, Elliman NA, Rhodes O. Placebo expectancy effects in the  
23 531 relationship between glucose and cognition. *Br J Nutr.* 2001;86(2):173-9.
- 24  
25 532 24. Yeomans MR, Re R, Wickham M, Lundholm H, Chambers L. Beyond expectations:  
26 533 the physiological basis of sensory enhancement of satiety. *Int J Obes (Lond).*  
27 534 2016;40(11):1693-8.
- 28  
29 535 25. Bowen J, Noakes M, Trenerry C, Clifton PM. Energy intake, ghrelin, and  
30 536 cholecystokinin after different carbohydrate and protein preloads in overweight men. *J Clin  
31 537 Endocrinol Metab.* 2006;91(4):1477-83.
- 32  
33 538 26. Garner DM, Garfinkel PE. The Eating Attitudes Test: an index of the symptoms of  
34 539 anorexia nervosa. *Psychol Med.* 1979;9(2):273-9.
- 35  
36 540 27. Masic U, Harrold JA, Christiansen P, Cuthbertson DJ, Hardman CA, Robinson E, et  
37 541 al. EffectS of non-nutritive sWeetened beverages on appetITe during aCtive weigHt loss  
38 542 (SWITCH): Protocol for a randomized, controlled trial assessing the effects of non-nutritive  
39 543 sweetened beverages compared to water during a 12-week weight loss period and a follow up  
40 544 weight maintenance period. *Contemp Clin Trials.* 2017;53:80-8.
- 41  
42 545 28. Booth M. Assessment of physical activity: an international perspective. *Res Q Exerc  
43 546 Sport.* 2000;71 Suppl 2:114-20.
- 44  
45 547 29. Dalton M, Finlayson G, Hill A, Blundell J. Preliminary validation and principal  
46 548 components analysis of the Control of Eating Questionnaire (CoEQ) for the experience of  
47 549 food craving. *European Journal of Clinical Nutrition.* 2015;69(12):1313-7.

- 1  
2  
3 550 30. Brunger L, Smith A, Re R, Wickham M, Philippides A, Watten P, et al. Validation of  
4 551 an iPad visual analogue rating system for assessing appetite and satiety. *Appetite*.  
5 552 2015;84:259-63.  
6  
7  
8 553 31. Gibbons C, Caudwell P, Finlayson G, King N, Blundell J. Validation of a new hand-  
9 554 held electronic data capture method for continuous monitoring of subjective appetite  
10 555 sensations. *Int J Behav Nutr Phys Act*. 2011;8:57.  
11  
12 556 32. Finlayson G, King N, Blundell J. The role of implicit wanting in relation to explicit  
13 557 liking and wanting for food: implications for appetite control. *Appetite*. 2008;50(1):120-7.  
14  
15 558 33. Forde CG, Almiron-Roig E, Brunstrom JM. Expected Satiety: Application to Weight  
16 559 Management and Understanding Energy Selection in Humans. *Current obesity reports*.  
17 560 2015;4(1):131-40.  
18  
19 561 34. Snoek HM, Huntjens L, Van Gemert LJ, De Graaf C, Weenen H. Sensory-specific  
20 562 satiety in obese and normal-weight women. *Am J Clin Nutr*. 2004;80(4):823-31.  
21  
22 563 35. Lasschuijt MP, Mars M, de Graaf C, Smeets PAM. Endocrine Cephalic Phase  
23 564 Responses to Food Cues: A Systematic Review. *Adv Nutr*. 2020;11(5):1364-83.  
24  
25 565 36. Anderson GH, Catherine NL, Woodend DM, Wolever TM. Inverse association  
26 566 between the effect of carbohydrates on blood glucose and subsequent short-term food intake  
27 567 in young men. *The American Journal of Clinical Nutrition*. 2002;76(5):1023-30.  
28  
29 568 37. Blundell J, De Graaf C, Hulshof T, Jebb S, Livingstone B, Lluch A, et al. Appetite  
30 569 control: Methodological aspects of the evaluation of foods. *Obesity Reviews*.  
31 570 2010;11(3):251-70.  
32  
33 571 38. Steinfeldt L, Anand J, Murayi T. Food Reporting Patterns in the USDA Automated  
34 572 Multiple-Pass Method. *Procedia Food Science*. 2013;2:145-56.  
35  
36 573 39. Australian Health Survey. Food Model Booklet. In: Statistics ABo, editor. Belconnen  
37 574 ACT2010.  
38  
39 575 40. Zandstra EH, Mathey MF, Graaf C, van Staveren WA. Short-term regulation of food  
40 576 intake in children, young adults and the elderly. *Eur J Clin Nutr*. 2000;54(3):239-46.  
41  
42 577 41. Brunstrom JM, Shakeshaft NG, Scott-Samuel NE. Measuring 'expected satiety' in a  
43 578 range of common foods using a method of constant stimuli. *Appetite*. 2008;51(3):604-14.  
44  
45 579 42. O'Donnell LJ, Virjee J, Heaton KW. Detection of pseudodiarrhoea by simple clinical  
46 580 assessment of intestinal transit rate. *BMJ (Clinical research ed)*. 1990;300(6722):439-40.  
47  
48 581 43. Svedlund J, Sjödin I, Dotevall G. GSRs--a clinical rating scale for gastrointestinal  
49 582 symptoms in patients with irritable bowel syndrome and peptic ulcer disease. *Dig Dis Sci*.  
50 583 1988;33(2):129-34.

1  
2  
3  
4  
5  
6  
7  
8  
9  
10  
11  
12  
13  
14  
15  
16  
17  
18  
19  
20  
21  
22  
23  
24  
25  
26  
27  
28  
29  
30  
31  
32  
33  
34  
35  
36  
37  
38  
39  
40  
41  
42  
43  
44  
45  
46  
47  
48  
49  
50  
51  
52  
53  
54  
55  
56  
57  
58  
59  
60

584 44. Wasserstein RL, Lazar NA. The ASA Statement on p-Values: Context, Process, and  
585 Purpose. The American Statistician. 2016;70(2):129-33.

586  
587

For peer review only



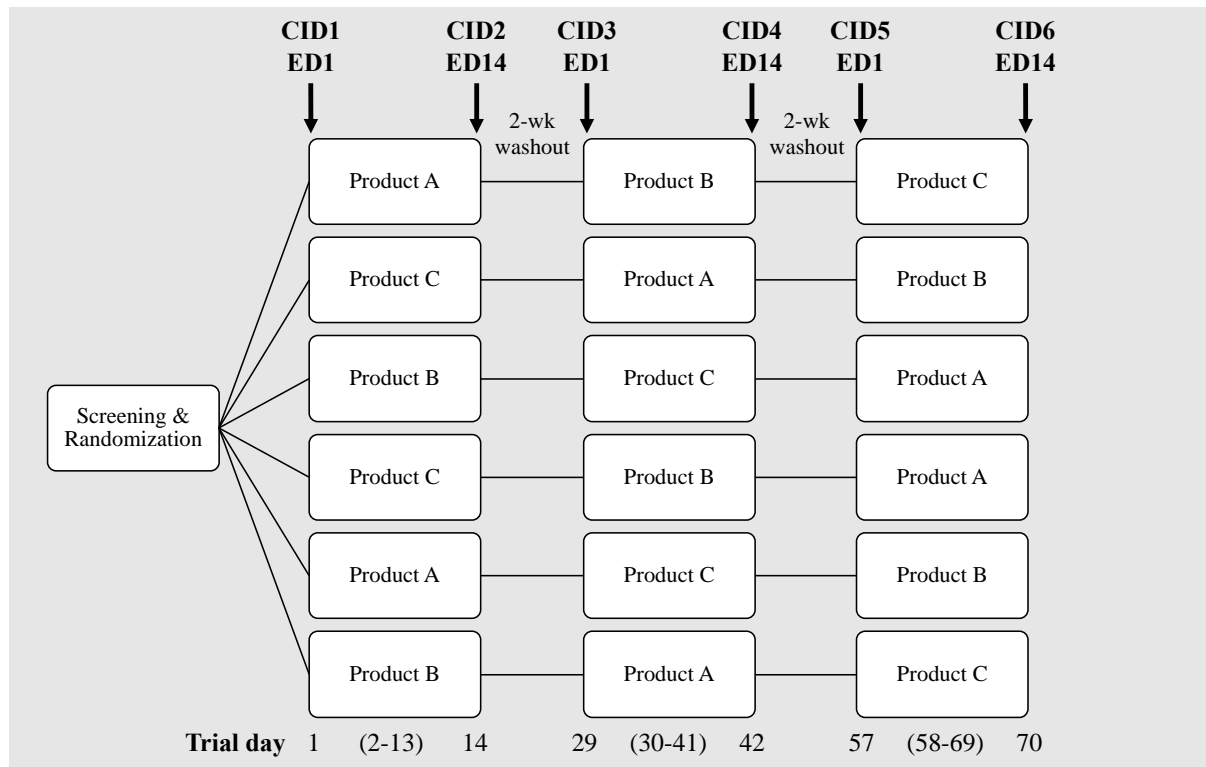

**Figure 1:** Latin Square design and duration for cross-over trials. Each trial will include two no added/reduced sugar reformulated products and 1 sucrose-sweetened control (double-blind) per food matrix. Participant will be randomised to 1 of 6 treatment orders. For example, a participant randomised to order one will consume product A in the lab on clinical investigation day (CID) 1/exposure day (ED) 1 and then every day at home until CID2/ED14 when it is consumed in the lab again. After a 2-week washout, the participant returns to the lab and repeats the study block with product B, followed by another 2-week washout, followed by the final study block with product C.



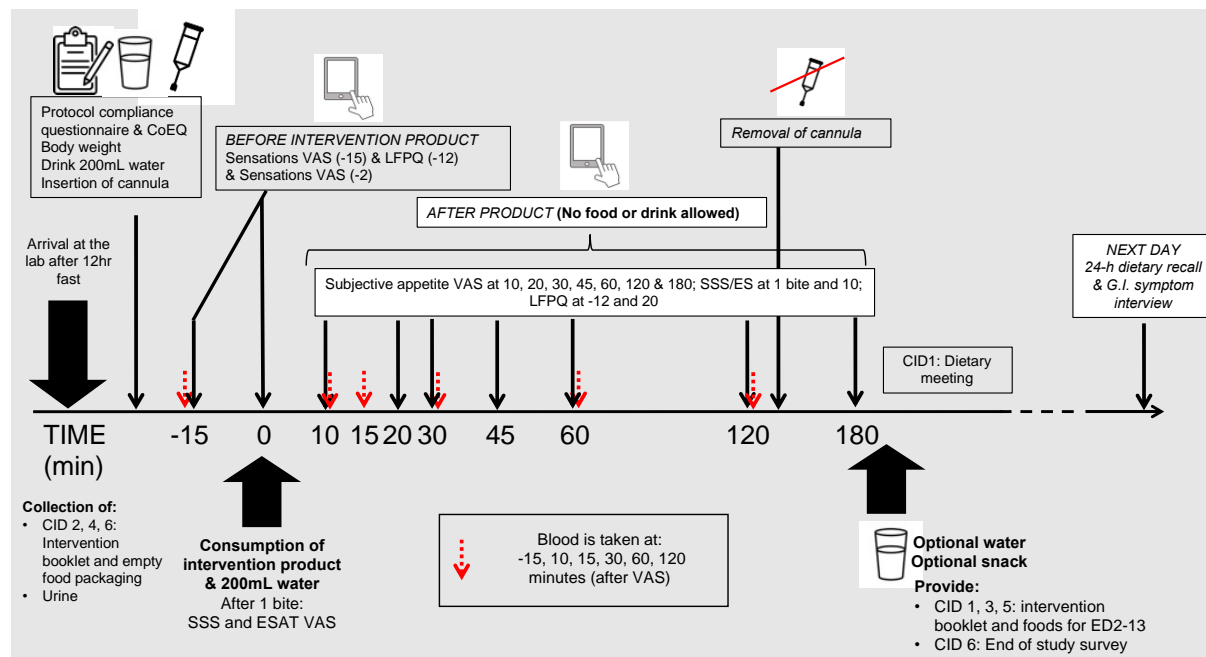

**Figure 2:** Example timeline of events during Clinical Investigation Day for biscuit matrix.

CoEQ, Control of Eating Questionnaire; ED, Exposure Day; ESAT, Expected Satiety; G.I., gastrointestinal; LFPQ, Leeds Food Preference Questionnaire; SSS, Sensory-Specific Satiety; VAS, Visual Analogue Scale.

## Supplemental Material 1: Exclusion Criteria

### General Criteria

- Blood donation < 3 month prior to study or for full duration of the study.
- Food allergy, intolerance, restriction or avoidance of any of the study foods (e.g., veganism) or history of anaphylactic reaction to any food.
- Likelihood for disordered eating defined as a score  $\geq 20$  on the EAT-26 test
- Currently dieting to lose weight.
- Having lost or gained >4.5 kg in the last 3 months.
- Smoking or having quit <3 months prior to study.
- Habitually consuming >14 units/week of alcohol in women or >21 units/week in men in the last 3 months.
- Performing >10 h of intense physical activity per week in the last 3 months.
- Night or late shift work (ending later than 11 pm on a permanent basis). Rotational shift work allowed if can attend on days that do not follow a late/night shift.
- Self-reported use of drugs of abuse within the previous 12 months.
- For women: Pregnancy, lactation.
- Persons who do not have access to either (mobile) phone or internet (this is necessary when being contacted by the study personnel during the study).
- Insufficient communication in the national language.
- Proven or suspected inability, physically or mentally, to comply with the procedures required by the study protocol as evaluated by the daily study manager, site-PI, PI or clinical responsible. This includes volunteers for which insufficient collaboration may be foreseen.
- Subject's general condition contraindicates continuing in the study as evaluated by the daily study manager, site-PI, PI or responsible clinician.
- Simultaneous participation in other relevant clinical intervention studies.
- Previous university or college training related to eating behaviour research.

### Medical conditions as known by the person

- Self-reported eating disorders.
- Diagnosed anaemia.
- Diagnosed diabetes mellitus.
- Abnormal G.I. function or structure such as malformation, angiodysplasia, active peptic ulcer.
- Active inflammatory bowel disease, celiac disease, chronic pancreatitis, or other disorder potentially causing malabsorption.
- History of G.I. surgery with permanent effect (i.e., surgical treatment of obesity).
- Medical history of CVD (e.g., current angina; myocardial infarction or stroke within the past 6 months; heart failure; symptomatic peripheral vascular disease).
- Significant liver disease, e.g., cirrhosis (fatty liver disease allowed).
- Malignancy which is currently active or in remission for less than five years after last treatment (local basal and squamous cell skin cancer allowed).
- Thyroid diseases, except those on Levothyroxine treatment of hypothyroidism if the person has been on a stable dose for at least 3 months.
- Psychiatric illness (e.g., major depression, bipolar disorders).

### Medication

- 1  
2  
3 • Use currently or within the previous 3 months of prescription or over the counter  
4 medication that has the potential of affecting appetite, satiety, or body weight incl. food  
5 supplements.

6 Except: low dose antidepressants if they, in the judgement of the daily study manager, site-  
7 PI, PI or clinical responsible, do not affect weight or following the study protocol.  
8 Levothyroxine for treatment of hypothyroidism is allowed if the person has been on a stable  
9 dose for at least 3 months.

- 10 • Cholesterol lowering medication, if the dose has changed during the last 3 months (i.e.,  
11 the medication is allowed if the participant has been on a stable dose for at least 3 months).  
12  
13  
14  
15  
16  
17  
18  
19  
20  
21  
22  
23  
24  
25  
26  
27  
28  
29  
30  
31  
32  
33  
34  
35  
36  
37  
38  
39  
40  
41  
42  
43  
44  
45  
46  
47  
48  
49  
50  
51  
52  
53  
54  
55  
56  
57  
58  
59  
60

For peer review only

## Supplemental Material 2: Product Ingredients List

Table 1: Proposed energy and nutrient composition of the intervention products

|                                    | Control  |                                                              | Reformulation |                                                              |
|------------------------------------|----------|--------------------------------------------------------------|---------------|--------------------------------------------------------------|
|                                    | Per 100g | Per portion<br>(85g/ 3 cakes)                                | Per 100g      | Per portion<br>(85g/ 3 cakes)                                |
| <b>Cake with fruit filling</b>     |          |                                                              |               |                                                              |
| Energy (kcal)                      | 391      | 332                                                          | 343           | 292                                                          |
| Energy (kJ)                        | 1638     | 1392                                                         | 1427          | 1213                                                         |
| Fats (g)                           | 16.6     | 14.1                                                         | 16.5          | 14.0                                                         |
| Sat. fats (g)                      | 1.7      | 1.4                                                          | 1.7           | 1.4                                                          |
| Carbs (g)                          | 56.8     | 48.2                                                         | 57.0          | 48.4                                                         |
| Sugars (g)                         | 28.3     | 24.1                                                         | 1.3           | 1.1                                                          |
| Polyols (g)                        | 3.7      | 3.1                                                          | 28.4          | 24.1                                                         |
| Fibre (g)                          | 1.4      | 1.2                                                          | 1.3           | 1.1                                                          |
| Proteins (g)                       | 5.7      | 4.8                                                          | 5.7           | 4.8                                                          |
| Salt (mg)                          | 0.4      | 0.3                                                          | 0.4           | 0.3                                                          |
| <b>Biscuit</b>                     | Per 100g | Per portion<br>(3 biscuits)                                  | Per 100g      | Per portion<br>(3 biscuits)                                  |
| Energy (kcal)                      | 423      | 360                                                          | 384           | 326                                                          |
| Energy (kJ)                        | 1783     | 1516                                                         | 1609          | 1368                                                         |
| Fats (g)                           | 11.2     | 9.5                                                          | 11.5          | 9.8                                                          |
| Sat. fats (g)                      | 7.11     | 6.0                                                          | 7.33          | 6.2                                                          |
| Carbs (g)                          | 75.9     | 64.5                                                         | 76.2          | 64.8                                                         |
| Sugars (g)                         | 24.7     | 21.0                                                         | 1.8           | 1.5                                                          |
| Polyols (g)                        | 3.7      | 3.1                                                          | 22.7          | 19.3                                                         |
| Fibre (g)                          | 0.7      | 0.6                                                          | 2.4           | 2.0                                                          |
| Proteins (g)                       | 6.5      | 5.5                                                          | 6.6           | 5.6                                                          |
| Salt (mg)                          | 0.7      | 0.6                                                          | 0.7           | 0.6                                                          |
| <b>Creamy yoghurt</b>              | Per 100g | Per portion<br>(135g 1 serving)                              | Per 100g      | Per portion<br>(135g 1 serving)                              |
| Energy (kcal)                      | 226      | 305                                                          | 180           | 242                                                          |
| Energy (kJ)                        | 943      | 1286                                                         | 750           | 1013                                                         |
| Fats (g)                           | 18.5     | 25.0                                                         | 16.3          | 22.0                                                         |
| Sat. fats (g)                      | 8.3      | 18.7                                                         | 8.3           | 18.7                                                         |
| Carbs (g)                          | 8.12     | 10.96                                                        | 1.71          | 2.31                                                         |
| Sugars (g)                         | 8.12     | 10.96                                                        | 1.71          | 2.31                                                         |
| Polyols (g)                        | 0.00     | 0.00                                                         | 0.00          | 0.00                                                         |
| Fibre (g)                          | 0.00     | 0.00                                                         | 0.00          | 0.00                                                         |
| Proteins (g)                       | 6.50     | 8.78                                                         | 6.50          | 8.78                                                         |
| Salt (mg)                          | 0.14     | 0.32                                                         | 0.14          | 0.32                                                         |
| <b>Chocolate</b>                   | Per 100g | Per portion<br>(60g 1 bar)                                   | Per 100g      | Per portion<br>(60g 1 bar)                                   |
| Energy (kcal)                      | 500      | 325                                                          | 477           | 310                                                          |
| Energy (kJ)                        | 2098     | 1364                                                         | 2004          | 1303                                                         |
| Fats (g)                           | 31       | 20                                                           | 31            | 20                                                           |
| Sat. fats (g)                      | 18       | 12                                                           | 18            | 12                                                           |
| Carbs (g)                          | 46       | 30                                                           | 46            | 30                                                           |
| Sugars (g)                         | 45       | 29                                                           | 31            | 20                                                           |
| Polyols (g)                        | 0        | 0                                                            | 12            | 8                                                            |
| Fibre (g)                          | 8        | 5                                                            | 8             | 5                                                            |
| Proteins (g)                       | 5        | 3                                                            | 5             | 3                                                            |
| Salt (mg)                          | 5        | 3                                                            | 8             | 5                                                            |
| <b>Honey ball breakfast cereal</b> | Per 100g | Per portion<br>(60 g of cereals + 125 ml<br>(121 g) of milk) | Per 100g      | Per portion<br>(60 g of cereals + 125 ml<br>(121 g) of milk) |
| Energy (kcal)                      | 173      | 320                                                          | 153           | 283                                                          |
| Energy (kJ)                        | 731.2    | 1353.8                                                       | 641.7         | 1187.2                                                       |
| Fats (g)                           | 3.26     | 6.03                                                         | 3.16          | 5.84                                                         |
| Sat. fats (g)                      | 1.64     | 3.04                                                         | 1.63          | 3.01                                                         |
| Carbs (g)                          | 31.17    | 57.66                                                        | 25.59         | 47.33                                                        |

1  
2  
3  
4  
5  
6  
7  
8  
9  
10  
11  
12  
13  
14  
15  
16  
17  
18  
19  
20  
21  
22  
23  
24  
25  
26  
27  
28  
29  
30  
31  
32  
33  
34  
35  
36  
37  
38  
39  
40  
41  
42  
43  
44  
45  
46  
47  
48  
49  
50  
51  
52  
53  
54  
55  
56  
57  
58  
59  
60

|              |       |       |      |       |
|--------------|-------|-------|------|-------|
| Sugars (g)   | 12.03 | 22.26 | 5.02 | 9.28  |
| Polyols (g)  | 0     | 0     | 4.86 | 9.00  |
| Fibre (g)    | 0.86  | 1.60  | 6.64 | 12.28 |
| Proteins (g) | 4.38  | 8.11  | 4.21 | 7.79  |
| Salt (mg)    | 0.35  | 0.64  | 0.33 | 0.60  |

For peer review only

### Supplementary Material 3 – Energy Intake Calculation

Percent energy compensation (%EC) was derived from the dietary recall data as previously reported by Zandstra et al.<sup>1</sup>, and Almiron-Roig et al<sup>2</sup>. Briefly, %EC was calculated as:

$$\%EC = [ (EI_{\text{Control Product}} - EI_{\text{Reformulated Product}}) / |EP| ] * 100$$

where EI represents the cumulative energy intake 24-h post consumption under the control product or under the reformulated product conditions, excluding the energy of the product itself. EP (as an absolute value) represents the difference in energy between the full-energy-containing preload (i.e., control product) and the lower-energy-containing preload (i.e., reformulated products). For example, if the control product has a value of 325 kcal and the reformulated product has a value of 250 kcal, then EP=325-250 or 75 kcal).

1. Zandstra, E. H., Mathey, M. F., Graaf, C., & van Staveren, W. A. (2000). Short-term regulation of food intake in children, young adults and the elderly. *European Journal of Clinical Nutrition*, 54(3), 239-246. <http://www.ncbi.nlm.nih.gov/pubmed/10713747>
2. Almiron-Roig, E., Palla, L., Guest, K., Ricchiutu, C., Vint, N., Jebb, S. A., & Drewnowski, A. (2013). Factors that determine energy compensation: a systematic review of preload studies. *Nutrition Reviews*, 71(7), 458-473. [https://doi.org/10.1111.nure.12048](https://doi.org/10.1111/nure.12048)

1  
2  
3 **Supplemental Material 4: Questions used to assess product taste text, subjective**  
4 **appetite sensations, sensory specific satiety and expected satiety**  
5  
6  
7

8 **Food Taste Test (FTT) (Conducted at screening)**  
9

10  
11 **Screen 1**  
12

13 You will now be presented with a food that we will ask you to evaluate. Please follow the  
14 instructions as they appear on the screen.  
15  
16  
17  
18  
19  
20

21 -----  
22 **Screen 2**  
23

- 24  
25 1. Take a mouthful of the food provided.  
26 2. Chew while counting to 5.  
27 3. Swallow.  
28 4. Answer the question by moving the arrow to the left or to the right.  
29  
30

31 **How pleasant was this food?**  
32  
33 Not at all pleasant Extremely  
34 pleasant  
35  
36  
37  
38  
39

40 -----  
41 **Screen 3**  
42

43 Thank you. This is the end of the taste test.  
44

45 Please call the investigator after submitting your answer.  
46  
47  
48  
49  
50  
51  
52  
53  
54  
55  
56  
57  
58  
59  
60

### **Subjective Appetite Questions (used during all CIDs)**

Considering how you feel **right now**, give your answer to each of the following questions by moving the arrow to the left or to the right at the point that best represents your experience. The list below is the complete list of questions used via visual analogue scales.

1. How **hungry** do you feel?
  2. How **full** do you feel?
  3. How **thirsty** do you feel?
  4. How strong is your **desire to eat**?
  5. How **much** do you think you could **eat** right now?
  6. How **nauseous** do you feel?
  7. How **bloated** do you feel?
  8. How strong is your appetite for something **savoury**?
  9. How strong is your appetite for something **sweet**?
- 

**Sensory Specific Satiety Questionnaire** (assessed after 1 bite and after consumption of product)

**After 1 bite:**

Please take a bite of the food and keep the food in your mouth while rating the food. Swallow the food only when your rating is complete.

How **pleasant** is the taste of the food right now?

**At 10 minutes:**

How **pleasant** is the taste of the food now that you have finished eating it?

**Expected Satiety (ESAT)** (assessed after 1 bite and after consumption of product)<sup>1</sup>

**After 1 bite:**

After having taken 1 bite of the food and looking at the whole food portion, how much will this portion of food stop you from feeling hungry between meals?

**At 10 minutes after full consumption and after SSS rating:**

How much will this food stop you from feeling hungry between meals?



## Supplemental Material 5: Fatty liver index and triglyceride glucose index calculation

### Calculation of Fatty Liver Index:

Some of the blood parameters will be used to calculate a Fatty Liver index (FLI) using the formula of Bedogni et al <sup>1</sup>, with measured values for BMI, fasting TG (mg/dL), fasting GGT (U/L) and waist circumference (cm), as follows:

$$FLI = \left( e^{0.953 \cdot \log_e(\text{triglycerides}) + 0.139 \cdot \text{BMI} + 0.718 \cdot \log_e(\text{ggt}) + 0.053 \cdot \text{waist circumference} - 15.745} \right) / \left( 1 + e^{0.953 \cdot \log_e(\text{triglycerides}) + 0.139 \cdot \text{BMI} + 0.718 \cdot \log_e(\text{ggt}) + 0.053 \cdot \text{waist circumference} - 15.745} \right) * 100$$

### Calculation of Triglyceride Glucose Index:

The formula of Simental-Mendía et al.<sup>2</sup> will be measured with measured fasting TG (mg/dL) and fasting glucose (mg/dL), by dividing the Ln of the TG \*glucose product by 2:

$$\text{TyG index} = \text{Ln} [(\text{fasting triglycerides}) (\text{mg/dL}) \times \text{fasting glucose} (\text{mg/dL})] / 2$$

1. Bedogni, G., Bellentani, S., Miglioli, L., Masutti, F., Passalacqua, M., Castiglione, A., & Tiribelli, C. (2006). The fatty liver index: A simple and accurate predictor of hepatic steatosis in the general population. *BMC Gastroenterology*, 6(1), 33. <https://doi.org/10.1186/1471-230X-6-33>
2. Simental-Mendía, L. E., Rodríguez-Morán, M., & Guerrero-Romero, F. (2008). The product of fasting glucose and triglycerides as surrogate for identifying insulin resistance in apparently healthy subjects. *Metabolic Syndrome and Related Disorders*, 6(4), 299–304. <https://doi.org/10.1089/met.2008.0034>

**Protocol for acute and repeated dose impact of sweeteners and sweetness enhancers on appetite-related behaviour, physiology, and health: a multi-centre, double-blind, cross-over, randomised, controlled trial in people with overweight/obesity. The SWEET project.**

**Supplemental Material 6: Trial Registration Data Set**

| Trial registration data                       |                                                                                                                                                                                                                                                                                                                                                                                                                                                                                                                                                                                                                                                                                                                                                                                                                                                                                                                                                                                                                                                                                                                                                                                                                                                                                                                                                                                                                                                                                                                                                                                                                                                                                                                                                                                                                                                                                                                                                                                                                                                                                                                                                                                                                                                                                                                                                                                                                                                                                                                                                                                                                                                                                                                                                                                                                                                                                                                                                                                                                                                                                                                                                                                                                                                                                                                                                                                                                                                                                                                                                                                                                                                                                                                                                                                                                                                                                                                                                                                                                                                                                                                                                                                                                                                                                                                              |
|-----------------------------------------------|------------------------------------------------------------------------------------------------------------------------------------------------------------------------------------------------------------------------------------------------------------------------------------------------------------------------------------------------------------------------------------------------------------------------------------------------------------------------------------------------------------------------------------------------------------------------------------------------------------------------------------------------------------------------------------------------------------------------------------------------------------------------------------------------------------------------------------------------------------------------------------------------------------------------------------------------------------------------------------------------------------------------------------------------------------------------------------------------------------------------------------------------------------------------------------------------------------------------------------------------------------------------------------------------------------------------------------------------------------------------------------------------------------------------------------------------------------------------------------------------------------------------------------------------------------------------------------------------------------------------------------------------------------------------------------------------------------------------------------------------------------------------------------------------------------------------------------------------------------------------------------------------------------------------------------------------------------------------------------------------------------------------------------------------------------------------------------------------------------------------------------------------------------------------------------------------------------------------------------------------------------------------------------------------------------------------------------------------------------------------------------------------------------------------------------------------------------------------------------------------------------------------------------------------------------------------------------------------------------------------------------------------------------------------------------------------------------------------------------------------------------------------------------------------------------------------------------------------------------------------------------------------------------------------------------------------------------------------------------------------------------------------------------------------------------------------------------------------------------------------------------------------------------------------------------------------------------------------------------------------------------------------------------------------------------------------------------------------------------------------------------------------------------------------------------------------------------------------------------------------------------------------------------------------------------------------------------------------------------------------------------------------------------------------------------------------------------------------------------------------------------------------------------------------------------------------------------------------------------------------------------------------------------------------------------------------------------------------------------------------------------------------------------------------------------------------------------------------------------------------------------------------------------------------------------------------------------------------------------------------------------------------------------------------------------------------------|
| Data category                                 | Information                                                                                                                                                                                                                                                                                                                                                                                                                                                                                                                                                                                                                                                                                                                                                                                                                                                                                                                                                                                                                                                                                                                                                                                                                                                                                                                                                                                                                                                                                                                                                                                                                                                                                                                                                                                                                                                                                                                                                                                                                                                                                                                                                                                                                                                                                                                                                                                                                                                                                                                                                                                                                                                                                                                                                                                                                                                                                                                                                                                                                                                                                                                                                                                                                                                                                                                                                                                                                                                                                                                                                                                                                                                                                                                                                                                                                                                                                                                                                                                                                                                                                                                                                                                                                                                                                                                  |
| Primary registry and trial identifying number | ClinicalTrials.gov NCT04633681                                                                                                                                                                                                                                                                                                                                                                                                                                                                                                                                                                                                                                                                                                                                                                                                                                                                                                                                                                                                                                                                                                                                                                                                                                                                                                                                                                                                                                                                                                                                                                                                                                                                                                                                                                                                                                                                                                                                                                                                                                                                                                                                                                                                                                                                                                                                                                                                                                                                                                                                                                                                                                                                                                                                                                                                                                                                                                                                                                                                                                                                                                                                                                                                                                                                                                                                                                                                                                                                                                                                                                                                                                                                                                                                                                                                                                                                                                                                                                                                                                                                                                                                                                                                                                                                                               |
| Date of registration in primary registry      | November 2021                                                                                                                                                                                                                                                                                                                                                                                                                                                                                                                                                                                                                                                                                                                                                                                                                                                                                                                                                                                                                                                                                                                                                                                                                                                                                                                                                                                                                                                                                                                                                                                                                                                                                                                                                                                                                                                                                                                                                                                                                                                                                                                                                                                                                                                                                                                                                                                                                                                                                                                                                                                                                                                                                                                                                                                                                                                                                                                                                                                                                                                                                                                                                                                                                                                                                                                                                                                                                                                                                                                                                                                                                                                                                                                                                                                                                                                                                                                                                                                                                                                                                                                                                                                                                                                                                                                |
| Secondary identifying numbers                 | N/A                                                                                                                                                                                                                                                                                                                                                                                                                                                                                                                                                                                                                                                                                                                                                                                                                                                                                                                                                                                                                                                                                                                                                                                                                                                                                                                                                                                                                                                                                                                                                                                                                                                                                                                                                                                                                                                                                                                                                                                                                                                                                                                                                                                                                                                                                                                                                                                                                                                                                                                                                                                                                                                                                                                                                                                                                                                                                                                                                                                                                                                                                                                                                                                                                                                                                                                                                                                                                                                                                                                                                                                                                                                                                                                                                                                                                                                                                                                                                                                                                                                                                                                                                                                                                                                                                                                          |
| Source(s) of monetary or material support     | European Union Horizon 2020 Program                                                                                                                                                                                                                                                                                                                                                                                                                                                                                                                                                                                                                                                                                                                                                                                                                                                                                                                                                                                                                                                                                                                                                                                                                                                                                                                                                                                                                                                                                                                                                                                                                                                                                                                                                                                                                                                                                                                                                                                                                                                                                                                                                                                                                                                                                                                                                                                                                                                                                                                                                                                                                                                                                                                                                                                                                                                                                                                                                                                                                                                                                                                                                                                                                                                                                                                                                                                                                                                                                                                                                                                                                                                                                                                                                                                                                                                                                                                                                                                                                                                                                                                                                                                                                                                                                          |
| Primary sponsor                               | European Union Horizon 2020 Program                                                                                                                                                                                                                                                                                                                                                                                                                                                                                                                                                                                                                                                                                                                                                                                                                                                                                                                                                                                                                                                                                                                                                                                                                                                                                                                                                                                                                                                                                                                                                                                                                                                                                                                                                                                                                                                                                                                                                                                                                                                                                                                                                                                                                                                                                                                                                                                                                                                                                                                                                                                                                                                                                                                                                                                                                                                                                                                                                                                                                                                                                                                                                                                                                                                                                                                                                                                                                                                                                                                                                                                                                                                                                                                                                                                                                                                                                                                                                                                                                                                                                                                                                                                                                                                                                          |
| Secondary sponsor(s)                          | N/A                                                                                                                                                                                                                                                                                                                                                                                                                                                                                                                                                                                                                                                                                                                                                                                                                                                                                                                                                                                                                                                                                                                                                                                                                                                                                                                                                                                                                                                                                                                                                                                                                                                                                                                                                                                                                                                                                                                                                                                                                                                                                                                                                                                                                                                                                                                                                                                                                                                                                                                                                                                                                                                                                                                                                                                                                                                                                                                                                                                                                                                                                                                                                                                                                                                                                                                                                                                                                                                                                                                                                                                                                                                                                                                                                                                                                                                                                                                                                                                                                                                                                                                                                                                                                                                                                                                          |
| Contact for public queries                    | Professor Graham Finlayson (G.S.Finlayson@leeds.ac.uk)                                                                                                                                                                                                                                                                                                                                                                                                                                                                                                                                                                                                                                                                                                                                                                                                                                                                                                                                                                                                                                                                                                                                                                                                                                                                                                                                                                                                                                                                                                                                                                                                                                                                                                                                                                                                                                                                                                                                                                                                                                                                                                                                                                                                                                                                                                                                                                                                                                                                                                                                                                                                                                                                                                                                                                                                                                                                                                                                                                                                                                                                                                                                                                                                                                                                                                                                                                                                                                                                                                                                                                                                                                                                                                                                                                                                                                                                                                                                                                                                                                                                                                                                                                                                                                                                       |
| Contact for scientific queries                | Professor Graham Finlayson (G.S.Finlayson@leeds.ac.uk)                                                                                                                                                                                                                                                                                                                                                                                                                                                                                                                                                                                                                                                                                                                                                                                                                                                                                                                                                                                                                                                                                                                                                                                                                                                                                                                                                                                                                                                                                                                                                                                                                                                                                                                                                                                                                                                                                                                                                                                                                                                                                                                                                                                                                                                                                                                                                                                                                                                                                                                                                                                                                                                                                                                                                                                                                                                                                                                                                                                                                                                                                                                                                                                                                                                                                                                                                                                                                                                                                                                                                                                                                                                                                                                                                                                                                                                                                                                                                                                                                                                                                                                                                                                                                                                                       |
| Public title                                  | Impact of Sweeteners on Behaviour, Physiology & Health ( SWEET-WP2-P2 )                                                                                                                                                                                                                                                                                                                                                                                                                                                                                                                                                                                                                                                                                                                                                                                                                                                                                                                                                                                                                                                                                                                                                                                                                                                                                                                                                                                                                                                                                                                                                                                                                                                                                                                                                                                                                                                                                                                                                                                                                                                                                                                                                                                                                                                                                                                                                                                                                                                                                                                                                                                                                                                                                                                                                                                                                                                                                                                                                                                                                                                                                                                                                                                                                                                                                                                                                                                                                                                                                                                                                                                                                                                                                                                                                                                                                                                                                                                                                                                                                                                                                                                                                                                                                                                      |
| Scientific title                              | Acute and Repeated Impact of Sweeteners and Sweetness Enhancers on Food Behaviour, Physiology & Health (SWEET Work Package 2 Phase 2)                                                                                                                                                                                                                                                                                                                                                                                                                                                                                                                                                                                                                                                                                                                                                                                                                                                                                                                                                                                                                                                                                                                                                                                                                                                                                                                                                                                                                                                                                                                                                                                                                                                                                                                                                                                                                                                                                                                                                                                                                                                                                                                                                                                                                                                                                                                                                                                                                                                                                                                                                                                                                                                                                                                                                                                                                                                                                                                                                                                                                                                                                                                                                                                                                                                                                                                                                                                                                                                                                                                                                                                                                                                                                                                                                                                                                                                                                                                                                                                                                                                                                                                                                                                        |
| Countries of recruitment                      | Denmark, France, Spain, United Kingdom                                                                                                                                                                                                                                                                                                                                                                                                                                                                                                                                                                                                                                                                                                                                                                                                                                                                                                                                                                                                                                                                                                                                                                                                                                                                                                                                                                                                                                                                                                                                                                                                                                                                                                                                                                                                                                                                                                                                                                                                                                                                                                                                                                                                                                                                                                                                                                                                                                                                                                                                                                                                                                                                                                                                                                                                                                                                                                                                                                                                                                                                                                                                                                                                                                                                                                                                                                                                                                                                                                                                                                                                                                                                                                                                                                                                                                                                                                                                                                                                                                                                                                                                                                                                                                                                                       |
| Health condition(s) or problem(s) studied     | Eating Behaviour                                                                                                                                                                                                                                                                                                                                                                                                                                                                                                                                                                                                                                                                                                                                                                                                                                                                                                                                                                                                                                                                                                                                                                                                                                                                                                                                                                                                                                                                                                                                                                                                                                                                                                                                                                                                                                                                                                                                                                                                                                                                                                                                                                                                                                                                                                                                                                                                                                                                                                                                                                                                                                                                                                                                                                                                                                                                                                                                                                                                                                                                                                                                                                                                                                                                                                                                                                                                                                                                                                                                                                                                                                                                                                                                                                                                                                                                                                                                                                                                                                                                                                                                                                                                                                                                                                             |
| Intervention(s)                               | Consumption of food product with sweetener and sweetness enhancer<br>Consumption of sucrose-sweetened control food product                                                                                                                                                                                                                                                                                                                                                                                                                                                                                                                                                                                                                                                                                                                                                                                                                                                                                                                                                                                                                                                                                                                                                                                                                                                                                                                                                                                                                                                                                                                                                                                                                                                                                                                                                                                                                                                                                                                                                                                                                                                                                                                                                                                                                                                                                                                                                                                                                                                                                                                                                                                                                                                                                                                                                                                                                                                                                                                                                                                                                                                                                                                                                                                                                                                                                                                                                                                                                                                                                                                                                                                                                                                                                                                                                                                                                                                                                                                                                                                                                                                                                                                                                                                                   |
| Key inclusion and exclusion criteria          | Ages eligible for study: $\geq 18 \leq 60$ years ; Sexes eligible for study :both; Accepts healthy volunteers: yes                                                                                                                                                                                                                                                                                                                                                                                                                                                                                                                                                                                                                                                                                                                                                                                                                                                                                                                                                                                                                                                                                                                                                                                                                                                                                                                                                                                                                                                                                                                                                                                                                                                                                                                                                                                                                                                                                                                                                                                                                                                                                                                                                                                                                                                                                                                                                                                                                                                                                                                                                                                                                                                                                                                                                                                                                                                                                                                                                                                                                                                                                                                                                                                                                                                                                                                                                                                                                                                                                                                                                                                                                                                                                                                                                                                                                                                                                                                                                                                                                                                                                                                                                                                                           |
|                                               | <p>Inclusion criteria: BMI 25-35kgm<sup>2</sup>; Use of contraceptive methods or not planning to become pregnant for the duration of the study (women only); Regular consumption of sugar-containing foods and willing to consume sugar and artificially-sweetened food products; Liking of the intervention foods defined by a response of 'Yes' for the product during the pre-screening interview and a score of 40% or above on the Liking Visual Analogue Scale for the sucrose-sweetened control product; Able to participate on the Clinical Investigation Days during normal working hours; Healthy as determined from the self-reported medical history or when a clinical condition exists, when this is considered to be irrelevant (i.e. not influencing study outcomes) for the study by the study medical doctor; Consuming breakfast regularly (at least 5 days per week); Able to understand and be willing to sign the informed consent form, and to follow all the study procedures and requirements; Capacity to store at-home intervention quantity of intervention product</p> <p>Exclusion criteria: Blood donation &lt; 3 month prior to study or for full duration of the study; Food allergy, intolerance, restriction or avoidance of any of the study foods (e.g. veganism) or history of anaphylactic reaction to any food; Likelihood for disordered eating defined as a score <math>\geq 20</math> on the Eating Attitudes Test; Currently dieting to lose weight; Having lost or gained &gt;4.5 kg in the last 3 months; Smoking or having quit &lt;3 months prior to study; Habitually consuming &gt;14 units/week of alcohol in women or &gt;21 units/week in men in the last 3 months; Performing &gt;10 h of intense physical activity per week in the last 3 months; Night or late shift work (ending later than 11 pm on a permanent basis). Rotational shift work allowed if can attend on days that do not follow a late/night shift; Self-reported use of drugs of abuse within the previous 12 months; Pregnancy, lactation (women only); Persons who do not have access to either (mobile) phone or internet (this is necessary when being contacted by the study personnel during the study); Insufficient communication in the national language; Proven or suspected inability, physically or mentally, to comply with the procedures required by the study protocol as evaluated by the daily study manager, site-PI, PI or clinical responsible. This includes volunteers for which insufficient collaboration may be foreseen; Subject's general condition contraindicates continuing in the study as evaluated by the daily study manager, site-PI, PI or responsible clinician; Simultaneous participation in other relevant clinical intervention studies; Previous university or college training related to eating behaviour research; Self-reported eating disorders; Diagnosed anaemia; Diagnosed diabetes mellitus; Abnormal G.I. function or structure such as malformation, angiodysplasia, active peptic ulcer; Active inflammatory bowel disease, coeliac disease, chronic pancreatitis or other disorder potentially causing malabsorption; History of G.I. surgery with permanent effect (i.e. surgical treatment of obesity); Medical history of Cardiovascular Disease (e.g. current angina; myocardial infarction or stroke within the past 6 months; heart failure; symptomatic peripheral vascular disease); Significant liver disease, e.g. cirrhosis (fatty liver disease allowed); Malignancy which is currently active or in remission for less than five years after last treatment (local basal and squamous cell skin cancer allowed); Thyroid diseases, except those on Levothyroxine treatment of hypothyroidism if the person has been on a stable dose for at least 3months; Psychiatric illness (e.g. major depression, bipolar disorders); Use currently or within the previous 3 months of prescription or over the counter medication that has the potential of affecting appetite, satiety or body weight incl. food supplements. Except: low dose antidepressants if they, in the judgement of the daily study manager, site-PI, PI or clinical responsible, do not affect weight or following the study protocol. Levothyroxine for</p> |

|    |                                                                                                                                       |
|----|---------------------------------------------------------------------------------------------------------------------------------------|
| 1  |                                                                                                                                       |
| 2  |                                                                                                                                       |
| 3  | treatment of hypothyroidism is allowed if the person has been on a stable dose for at least 3 months. Cholesterol lowering            |
| 4  | medication, if the dose has changed during the last 3 months (i.e., the medication is allowed if the participant has been on a stable |
| 5  | dose for at least 3 months)                                                                                                           |
| 6  | Interventional                                                                                                                        |
| 7  | Allocation: Randomised. Double-blind, within-subjects, cross-over trial                                                               |
| 8  |                                                                                                                                       |
| 9  | Study type                                                                                                                            |
| 10 | Primary purpose: Evaluation                                                                                                           |
| 11 | Phase: N/A                                                                                                                            |
| 12 | Date of first enrolment                                                                                                               |
| 13 | April 2021                                                                                                                            |
| 14 | Target sample size                                                                                                                    |
| 15 | 213                                                                                                                                   |
| 16 | Recruitment status                                                                                                                    |
| 17 | Recruiting                                                                                                                            |
| 18 | Primary outcome(s)                                                                                                                    |
| 19 | Incremental area under the curve (iAUC) for composite appetite sensations in response to each product.                                |
| 20 | Leeds Food Preference Questionnaire (LFPQ) Explicit Liking, Implicit Wanting, Relative preference, Explicit wanting; Control of       |
| 21 | Eating Questionnaire (CoEQ): Craving Control, Craving for Sweet, Craving for Savoury, Positive Mood; Blood Glucose                    |
| 22 | Incremental Area Under the Curve; Blood Insulin Incremental Area Under the Curve; Cephalic and intestinal satiety biomarkers:         |
| 23 | Glucagon-like peptide-1 (GLP-1) Incremental area under the curve for blood GLP-1 concentrations in response to each product           |
| 24 | (120 min post intake); Ghrelin Incremental area under the curve for blood Ghrelin concentrations in response to each product          |
| 25 | (120 min post intake).                                                                                                                |
| 26 |                                                                                                                                       |
| 27 |                                                                                                                                       |
| 28 |                                                                                                                                       |
| 29 |                                                                                                                                       |
| 30 |                                                                                                                                       |
| 31 |                                                                                                                                       |
| 32 |                                                                                                                                       |
| 33 |                                                                                                                                       |
| 34 |                                                                                                                                       |
| 35 |                                                                                                                                       |
| 36 |                                                                                                                                       |
| 37 |                                                                                                                                       |
| 38 |                                                                                                                                       |
| 39 |                                                                                                                                       |
| 40 |                                                                                                                                       |
| 41 |                                                                                                                                       |
| 42 |                                                                                                                                       |
| 43 |                                                                                                                                       |
| 44 |                                                                                                                                       |
| 45 |                                                                                                                                       |
| 46 |                                                                                                                                       |
| 47 |                                                                                                                                       |
| 48 |                                                                                                                                       |
| 49 |                                                                                                                                       |
| 50 |                                                                                                                                       |
| 51 |                                                                                                                                       |
| 52 |                                                                                                                                       |
| 53 |                                                                                                                                       |
| 54 |                                                                                                                                       |
| 55 |                                                                                                                                       |
| 56 |                                                                                                                                       |
| 57 |                                                                                                                                       |
| 58 |                                                                                                                                       |
| 59 |                                                                                                                                       |
| 60 |                                                                                                                                       |

# Reporting checklist for protocol of a clinical trial.

Based on the SPIRIT guidelines.

## Instructions to authors

Complete this checklist by entering the page numbers from your manuscript where readers will find each of the items listed below.

Your article may not currently address all the items on the checklist. Please modify your text to include the missing information. If you are certain that an item does not apply, please write "n/a" and provide a short explanation.

Upload your completed checklist as an extra file when you submit to a journal.

In your methods section, say that you used the SPIRIT reporting guidelines, and cite them as:

Chan A-W, Tetzlaff JM, Gøtzsche PC, Altman DG, Mann H, Berlin J, Dickersin K, Hróbjartsson A, Schulz KF, Parulekar WR, Krleža-Jerić K, Laupacis A, Moher D. SPIRIT 2013 Explanation and Elaboration: Guidance for protocols of clinical trials. *BMJ*. 2013;346:e7586

|                                             |                     | Reporting Item                                                                                               | Page Number             |
|---------------------------------------------|---------------------|--------------------------------------------------------------------------------------------------------------|-------------------------|
| <b>Administrative information</b>           |                     |                                                                                                              |                         |
| Title                                       | <a href="#">#1</a>  | Descriptive title identifying the study design, population, interventions, and, if applicable, trial acronym | 1                       |
| Trial registration                          | <a href="#">#2a</a> | Trial identifier and registry name. If not yet registered, name of intended registry                         | 12                      |
| Trial registration: data set                | <a href="#">#2b</a> | All items from the World Health Organization Trial Registration Data Set                                     | Supplemental Material 6 |
| Protocol version                            | <a href="#">#3</a>  | Date and version identifier                                                                                  | 6                       |
| Funding                                     | <a href="#">#4</a>  | Sources and types of financial, material, and other support                                                  | 15                      |
| Roles and responsibilities: contributorship | <a href="#">#5a</a> | Names, affiliations, and roles of protocol contributors                                                      | 16                      |

|    |                      |                     |                                                     |          |
|----|----------------------|---------------------|-----------------------------------------------------|----------|
| 1  | Roles and            | <a href="#">#5b</a> | Name and contact information for the trial          | 15       |
| 2  | responsibilities:    |                     | sponsor                                             |          |
| 3  | sponsor contact      |                     |                                                     |          |
| 4  | information          |                     |                                                     |          |
| 5  |                      |                     |                                                     |          |
| 6  |                      |                     |                                                     |          |
| 7  |                      |                     |                                                     |          |
| 8  | Roles and            | <a href="#">#5c</a> | Role of study sponsor and funders, if any, in       | 15       |
| 9  | responsibilities:    |                     | study design; collection, management, analysis,     |          |
| 10 | sponsor and funder   |                     | and interpretation of data; writing of the report;  |          |
| 11 |                      |                     | and the decision to submit the report for           |          |
| 12 |                      |                     | publication, including whether they will have       |          |
| 13 |                      |                     | ultimate authority over any of these activities     |          |
| 14 |                      |                     |                                                     |          |
| 15 |                      |                     |                                                     |          |
| 16 |                      |                     |                                                     |          |
| 17 | Roles and            | <a href="#">#5d</a> | Composition, roles, and responsibilities of the     | 7 and 15 |
| 18 | responsibilities:    |                     | coordinating centre, steering committee,            |          |
| 19 | committees           |                     | endpoint adjudication committee, data               |          |
| 20 |                      |                     | management team, and other individuals or           |          |
| 21 |                      |                     | groups overseeing the trial, if applicable (see     |          |
| 22 |                      |                     | Item 21a for data monitoring committee)             |          |
| 23 |                      |                     |                                                     |          |
| 24 |                      |                     |                                                     |          |
| 25 |                      |                     |                                                     |          |
| 26 |                      |                     |                                                     |          |
| 27 | <b>Introduction</b>  |                     |                                                     |          |
| 28 |                      |                     |                                                     |          |
| 29 |                      |                     |                                                     |          |
| 30 | Background and       | <a href="#">#6a</a> | Description of research question and justification  | 4        |
| 31 | rationale            |                     | for undertaking the trial, including summary of     |          |
| 32 |                      |                     | relevant studies (published and unpublished)        |          |
| 33 |                      |                     | examining benefits and harms for each               |          |
| 34 |                      |                     | intervention                                        |          |
| 35 |                      |                     |                                                     |          |
| 36 |                      |                     |                                                     |          |
| 37 |                      |                     |                                                     |          |
| 38 | Background and       | <a href="#">#6b</a> | Explanation for choice of comparators               | 4        |
| 39 | rationale: choice of |                     |                                                     |          |
| 40 | comparators          |                     |                                                     |          |
| 41 |                      |                     |                                                     |          |
| 42 |                      |                     |                                                     |          |
| 43 | Objectives           | <a href="#">#7</a>  | Specific objectives or hypotheses                   | 5        |
| 44 |                      |                     |                                                     |          |
| 45 |                      |                     |                                                     |          |
| 46 | Trial design         | <a href="#">#8</a>  | Description of trial design including type of trial | 6        |
| 47 |                      |                     | (eg, parallel group, crossover, factorial, single   |          |
| 48 |                      |                     | group), allocation ratio, and framework (eg,        |          |
| 49 |                      |                     | superiority, equivalence, non-inferiority,          |          |
| 50 |                      |                     | exploratory)                                        |          |
| 51 |                      |                     |                                                     |          |
| 52 |                      |                     |                                                     |          |
| 53 |                      |                     |                                                     |          |

**Methods:  
Participants,  
interventions, and  
outcomes**

|    |                                 |                      |                                                                                                                                                                                                                                                                                                                                                                                |                                   |
|----|---------------------------------|----------------------|--------------------------------------------------------------------------------------------------------------------------------------------------------------------------------------------------------------------------------------------------------------------------------------------------------------------------------------------------------------------------------|-----------------------------------|
| 1  | Study setting                   | <a href="#">#9</a>   | Description of study settings (eg, community clinic, academic hospital) and list of countries where data will be collected. Reference to where list of study sites can be obtained                                                                                                                                                                                             | 7                                 |
| 2  |                                 |                      |                                                                                                                                                                                                                                                                                                                                                                                |                                   |
| 3  |                                 |                      |                                                                                                                                                                                                                                                                                                                                                                                |                                   |
| 4  |                                 |                      |                                                                                                                                                                                                                                                                                                                                                                                |                                   |
| 5  |                                 |                      |                                                                                                                                                                                                                                                                                                                                                                                |                                   |
| 6  |                                 |                      |                                                                                                                                                                                                                                                                                                                                                                                |                                   |
| 7  |                                 |                      |                                                                                                                                                                                                                                                                                                                                                                                |                                   |
| 8  | Eligibility criteria            | <a href="#">#10</a>  | Inclusion and exclusion criteria for participants. If applicable, eligibility criteria for study centres and individuals who will perform the interventions (eg, surgeons, psychotherapists)                                                                                                                                                                                   | 7 & Supplemental Material 1       |
| 9  |                                 |                      |                                                                                                                                                                                                                                                                                                                                                                                |                                   |
| 10 |                                 |                      |                                                                                                                                                                                                                                                                                                                                                                                |                                   |
| 11 |                                 |                      |                                                                                                                                                                                                                                                                                                                                                                                |                                   |
| 12 |                                 |                      |                                                                                                                                                                                                                                                                                                                                                                                |                                   |
| 13 |                                 |                      |                                                                                                                                                                                                                                                                                                                                                                                |                                   |
| 14 | Interventions: description      | <a href="#">#11a</a> | Interventions for each group with sufficient detail to allow replication, including how and when they will be administered                                                                                                                                                                                                                                                     | 7-8                               |
| 15 |                                 |                      |                                                                                                                                                                                                                                                                                                                                                                                |                                   |
| 16 |                                 |                      |                                                                                                                                                                                                                                                                                                                                                                                |                                   |
| 17 |                                 |                      |                                                                                                                                                                                                                                                                                                                                                                                |                                   |
| 18 |                                 |                      |                                                                                                                                                                                                                                                                                                                                                                                |                                   |
| 19 |                                 |                      |                                                                                                                                                                                                                                                                                                                                                                                |                                   |
| 20 | Interventions: modifications    | <a href="#">#11b</a> | Criteria for discontinuing or modifying allocated interventions for a given trial participant (eg, drug dose change in response to harms, participant request, or improving / worsening disease)                                                                                                                                                                               | N/A not required                  |
| 21 |                                 |                      |                                                                                                                                                                                                                                                                                                                                                                                |                                   |
| 22 |                                 |                      |                                                                                                                                                                                                                                                                                                                                                                                |                                   |
| 23 |                                 |                      |                                                                                                                                                                                                                                                                                                                                                                                |                                   |
| 24 |                                 |                      |                                                                                                                                                                                                                                                                                                                                                                                |                                   |
| 25 |                                 |                      |                                                                                                                                                                                                                                                                                                                                                                                |                                   |
| 26 |                                 |                      |                                                                                                                                                                                                                                                                                                                                                                                |                                   |
| 27 | Interventions: adherence        | <a href="#">#11c</a> | Strategies to improve adherence to intervention protocols, and any procedures for monitoring adherence (eg, drug tablet return; laboratory tests)                                                                                                                                                                                                                              | N/A Not required                  |
| 28 |                                 |                      |                                                                                                                                                                                                                                                                                                                                                                                |                                   |
| 29 |                                 |                      |                                                                                                                                                                                                                                                                                                                                                                                |                                   |
| 30 |                                 |                      |                                                                                                                                                                                                                                                                                                                                                                                |                                   |
| 31 |                                 |                      |                                                                                                                                                                                                                                                                                                                                                                                |                                   |
| 32 |                                 |                      |                                                                                                                                                                                                                                                                                                                                                                                |                                   |
| 33 |                                 |                      |                                                                                                                                                                                                                                                                                                                                                                                |                                   |
| 34 | Interventions: concomitant care | <a href="#">#11d</a> | Relevant concomitant care and interventions that are permitted or prohibited during the trial                                                                                                                                                                                                                                                                                  | N/A participants are not patients |
| 35 |                                 |                      |                                                                                                                                                                                                                                                                                                                                                                                |                                   |
| 36 |                                 |                      |                                                                                                                                                                                                                                                                                                                                                                                |                                   |
| 37 | Outcomes                        | <a href="#">#12</a>  | Primary, secondary, and other outcomes, including the specific measurement variable (eg, systolic blood pressure), analysis metric (eg, change from baseline, final value, time to event), method of aggregation (eg, median, proportion), and time point for each outcome. Explanation of the clinical relevance of chosen efficacy and harm outcomes is strongly recommended | 12                                |
| 38 |                                 |                      |                                                                                                                                                                                                                                                                                                                                                                                |                                   |
| 39 |                                 |                      |                                                                                                                                                                                                                                                                                                                                                                                |                                   |
| 40 |                                 |                      |                                                                                                                                                                                                                                                                                                                                                                                |                                   |
| 41 |                                 |                      |                                                                                                                                                                                                                                                                                                                                                                                |                                   |
| 42 |                                 |                      |                                                                                                                                                                                                                                                                                                                                                                                |                                   |
| 43 |                                 |                      |                                                                                                                                                                                                                                                                                                                                                                                |                                   |
| 44 |                                 |                      |                                                                                                                                                                                                                                                                                                                                                                                |                                   |
| 45 |                                 |                      |                                                                                                                                                                                                                                                                                                                                                                                |                                   |
| 46 |                                 |                      |                                                                                                                                                                                                                                                                                                                                                                                |                                   |
| 47 |                                 |                      |                                                                                                                                                                                                                                                                                                                                                                                |                                   |
| 48 |                                 |                      |                                                                                                                                                                                                                                                                                                                                                                                |                                   |
| 49 |                                 |                      |                                                                                                                                                                                                                                                                                                                                                                                |                                   |
| 50 | Participant timeline            | <a href="#">#13</a>  | Time schedule of enrolment, interventions (including any run-ins and washouts), assessments, and visits for participants. A schematic diagram is highly recommended (see Figure)                                                                                                                                                                                               | 7                                 |
| 51 |                                 |                      |                                                                                                                                                                                                                                                                                                                                                                                |                                   |
| 52 |                                 |                      |                                                                                                                                                                                                                                                                                                                                                                                |                                   |
| 53 |                                 |                      |                                                                                                                                                                                                                                                                                                                                                                                |                                   |
| 54 |                                 |                      |                                                                                                                                                                                                                                                                                                                                                                                |                                   |
| 55 |                                 |                      |                                                                                                                                                                                                                                                                                                                                                                                |                                   |
| 56 |                                 |                      |                                                                                                                                                                                                                                                                                                                                                                                |                                   |
| 57 |                                 |                      |                                                                                                                                                                                                                                                                                                                                                                                |                                   |
| 58 |                                 |                      |                                                                                                                                                                                                                                                                                                                                                                                |                                   |
| 59 |                                 |                      |                                                                                                                                                                                                                                                                                                                                                                                |                                   |
| 60 |                                 |                      |                                                                                                                                                                                                                                                                                                                                                                                |                                   |

|    |                           |                      |                                                       |                         |
|----|---------------------------|----------------------|-------------------------------------------------------|-------------------------|
| 1  | Sample size               | <a href="#">#14</a>  | Estimated number of participants needed to            | 6                       |
| 2  |                           |                      | achieve study objectives and how it was               |                         |
| 3  |                           |                      | determined, including clinical and statistical        |                         |
| 4  |                           |                      | assumptions supporting any sample size                |                         |
| 5  |                           |                      | calculations                                          |                         |
| 6  |                           |                      |                                                       |                         |
| 7  |                           |                      |                                                       |                         |
| 8  |                           |                      |                                                       |                         |
| 9  | Recruitment               | <a href="#">#15</a>  | Strategies for achieving adequate participant         | 8                       |
| 10 |                           |                      | enrolment to reach target sample size                 |                         |
| 11 |                           |                      |                                                       |                         |
| 12 |                           |                      |                                                       |                         |
| 13 | <b>Methods:</b>           |                      |                                                       |                         |
| 14 | <b>Assignment of</b>      |                      |                                                       |                         |
| 15 | <b>interventions (for</b> |                      |                                                       |                         |
| 16 | <b>controlled trials)</b> |                      |                                                       |                         |
| 17 |                           |                      |                                                       |                         |
| 18 |                           |                      |                                                       |                         |
| 19 |                           |                      |                                                       |                         |
| 20 | Allocation: sequence      | <a href="#">#16a</a> | Method of generating the allocation sequence          | 8-9                     |
| 21 | generation                |                      | (eg, computer-generated random numbers), and          |                         |
| 22 |                           |                      | list of any factors for stratification. To reduce     |                         |
| 23 |                           |                      | predictability of a random sequence, details of       |                         |
| 24 |                           |                      | any planned restriction (eg, blocking) should be      |                         |
| 25 |                           |                      | provided in a separate document that is               |                         |
| 26 |                           |                      | unavailable to those who enrol participants or        |                         |
| 27 |                           |                      | assign interventions                                  |                         |
| 28 |                           |                      |                                                       |                         |
| 29 |                           |                      |                                                       |                         |
| 30 |                           |                      |                                                       |                         |
| 31 |                           |                      |                                                       |                         |
| 32 |                           |                      |                                                       |                         |
| 33 | Allocation                | <a href="#">#16b</a> | Mechanism of implementing the allocation              | 9                       |
| 34 | concealment               |                      | sequence (eg, central telephone; sequentially         |                         |
| 35 | mechanism                 |                      | numbered, opaque, sealed envelopes),                  |                         |
| 36 |                           |                      | describing any steps to conceal the sequence          |                         |
| 37 |                           |                      | until interventions are assigned                      |                         |
| 38 |                           |                      |                                                       |                         |
| 39 |                           |                      |                                                       |                         |
| 40 |                           |                      |                                                       |                         |
| 41 | Allocation:               | <a href="#">#16c</a> | Who will generate the allocation sequence, who        | 8                       |
| 42 | implementation            |                      | will enrol participants, and who will assign          |                         |
| 43 |                           |                      | participants to interventions                         |                         |
| 44 |                           |                      |                                                       |                         |
| 45 |                           |                      |                                                       |                         |
| 46 | Blinding (masking)        | <a href="#">#17a</a> | Who will be blinded after assignment to               | 9                       |
| 47 |                           |                      | interventions (eg, trial participants, care           |                         |
| 48 |                           |                      | providers, outcome assessors, data analysts),         |                         |
| 49 |                           |                      | and how                                               |                         |
| 50 |                           |                      |                                                       |                         |
| 51 |                           |                      |                                                       |                         |
| 52 |                           |                      |                                                       |                         |
| 53 | Blinding (masking):       | <a href="#">#17b</a> | If blinded, circumstances under which unblinding      | N/A: No safety/critical |
| 54 | emergency                 |                      | is permissible, and procedure for revealing a         | efficacy issues present |
| 55 | unblinding                |                      | participant's allocated intervention during the trial |                         |
| 56 |                           |                      |                                                       |                         |
| 57 |                           |                      |                                                       |                         |
| 58 |                           |                      |                                                       |                         |
| 59 |                           |                      |                                                       |                         |
| 60 |                           |                      |                                                       |                         |



1 **Methods: Data**  
 2 **collection,**  
 3 **management, and**  
 4 **analysis**  
 5  
 6

|    |                                                  |                      |                                                                                                                                                                                                                                                                                                                                                                                                              |
|----|--------------------------------------------------|----------------------|--------------------------------------------------------------------------------------------------------------------------------------------------------------------------------------------------------------------------------------------------------------------------------------------------------------------------------------------------------------------------------------------------------------|
| 7  |                                                  |                      |                                                                                                                                                                                                                                                                                                                                                                                                              |
| 8  | Data collection plan                             | <a href="#">#18a</a> | Plans for assessment and collection of outcome, baseline, and other trial data, including any related processes to promote data quality (eg, duplicate measurements, training of assessors) and a description of study instruments (eg, questionnaires, laboratory tests) along with their reliability and validity, if known. Reference to where data collection forms can be found, if not in the protocol |
| 9  |                                                  |                      | 15; Supplemental Material 4                                                                                                                                                                                                                                                                                                                                                                                  |
| 10 |                                                  |                      |                                                                                                                                                                                                                                                                                                                                                                                                              |
| 11 |                                                  |                      |                                                                                                                                                                                                                                                                                                                                                                                                              |
| 12 |                                                  |                      |                                                                                                                                                                                                                                                                                                                                                                                                              |
| 13 |                                                  |                      |                                                                                                                                                                                                                                                                                                                                                                                                              |
| 14 |                                                  |                      |                                                                                                                                                                                                                                                                                                                                                                                                              |
| 15 |                                                  |                      |                                                                                                                                                                                                                                                                                                                                                                                                              |
| 16 |                                                  |                      |                                                                                                                                                                                                                                                                                                                                                                                                              |
| 17 |                                                  |                      |                                                                                                                                                                                                                                                                                                                                                                                                              |
| 18 |                                                  |                      |                                                                                                                                                                                                                                                                                                                                                                                                              |
| 19 |                                                  |                      |                                                                                                                                                                                                                                                                                                                                                                                                              |
| 20 |                                                  |                      |                                                                                                                                                                                                                                                                                                                                                                                                              |
| 21 |                                                  |                      |                                                                                                                                                                                                                                                                                                                                                                                                              |
| 22 | Data collection plan: retention                  | <a href="#">#18b</a> | Plans to promote participant retention and complete follow-up, including list of any outcome data to be collected for participants who discontinue or deviate from intervention protocols                                                                                                                                                                                                                    |
| 23 |                                                  |                      | N/A Data from participants who discontinue/ deviate from protocol not collected                                                                                                                                                                                                                                                                                                                              |
| 24 |                                                  |                      |                                                                                                                                                                                                                                                                                                                                                                                                              |
| 25 |                                                  |                      |                                                                                                                                                                                                                                                                                                                                                                                                              |
| 26 |                                                  |                      |                                                                                                                                                                                                                                                                                                                                                                                                              |
| 27 |                                                  |                      |                                                                                                                                                                                                                                                                                                                                                                                                              |
| 28 |                                                  |                      |                                                                                                                                                                                                                                                                                                                                                                                                              |
| 29 |                                                  |                      |                                                                                                                                                                                                                                                                                                                                                                                                              |
| 30 | Data management                                  | <a href="#">#19</a>  | Plans for data entry, coding, security, and storage, including any related processes to promote data quality (eg, double data entry; range checks for data values). Reference to where details of data management procedures can be found, if not in the protocol                                                                                                                                            |
| 31 |                                                  |                      | 15; appendices                                                                                                                                                                                                                                                                                                                                                                                               |
| 32 |                                                  |                      |                                                                                                                                                                                                                                                                                                                                                                                                              |
| 33 |                                                  |                      |                                                                                                                                                                                                                                                                                                                                                                                                              |
| 34 |                                                  |                      |                                                                                                                                                                                                                                                                                                                                                                                                              |
| 35 |                                                  |                      |                                                                                                                                                                                                                                                                                                                                                                                                              |
| 36 |                                                  |                      |                                                                                                                                                                                                                                                                                                                                                                                                              |
| 37 |                                                  |                      |                                                                                                                                                                                                                                                                                                                                                                                                              |
| 38 |                                                  |                      |                                                                                                                                                                                                                                                                                                                                                                                                              |
| 39 |                                                  |                      |                                                                                                                                                                                                                                                                                                                                                                                                              |
| 40 | Statistics: outcomes                             | <a href="#">#20a</a> | Statistical methods for analysing primary and secondary outcomes. Reference to where other details of the statistical analysis plan can be found, if not in the protocol                                                                                                                                                                                                                                     |
| 41 |                                                  |                      | 14                                                                                                                                                                                                                                                                                                                                                                                                           |
| 42 |                                                  |                      |                                                                                                                                                                                                                                                                                                                                                                                                              |
| 43 |                                                  |                      |                                                                                                                                                                                                                                                                                                                                                                                                              |
| 44 |                                                  |                      |                                                                                                                                                                                                                                                                                                                                                                                                              |
| 45 |                                                  |                      |                                                                                                                                                                                                                                                                                                                                                                                                              |
| 46 |                                                  |                      |                                                                                                                                                                                                                                                                                                                                                                                                              |
| 47 | Statistics: additional analyses                  | <a href="#">#20b</a> | Methods for any additional analyses (eg, subgroup and adjusted analyses)                                                                                                                                                                                                                                                                                                                                     |
| 48 |                                                  |                      | N/A, no analysis included                                                                                                                                                                                                                                                                                                                                                                                    |
| 49 |                                                  |                      |                                                                                                                                                                                                                                                                                                                                                                                                              |
| 50 |                                                  |                      |                                                                                                                                                                                                                                                                                                                                                                                                              |
| 51 | Statistics: analysis population and missing data | <a href="#">#20c</a> | Definition of analysis population relating to protocol non-adherence (eg, as randomised analysis), and any statistical methods to handle missing data (eg, multiple imputation)                                                                                                                                                                                                                              |
| 52 |                                                  |                      | N/A, no analysis included                                                                                                                                                                                                                                                                                                                                                                                    |
| 53 |                                                  |                      |                                                                                                                                                                                                                                                                                                                                                                                                              |
| 54 |                                                  |                      |                                                                                                                                                                                                                                                                                                                                                                                                              |
| 55 |                                                  |                      |                                                                                                                                                                                                                                                                                                                                                                                                              |
| 56 |                                                  |                      |                                                                                                                                                                                                                                                                                                                                                                                                              |
| 57 |                                                  |                      |                                                                                                                                                                                                                                                                                                                                                                                                              |
| 58 |                                                  |                      |                                                                                                                                                                                                                                                                                                                                                                                                              |
| 59 |                                                  |                      |                                                                                                                                                                                                                                                                                                                                                                                                              |
| 60 |                                                  |                      |                                                                                                                                                                                                                                                                                                                                                                                                              |



**Methods:****Monitoring**

|    |                      |                      |                                                      |
|----|----------------------|----------------------|------------------------------------------------------|
| 1  |                      |                      |                                                      |
| 2  |                      |                      |                                                      |
| 3  |                      |                      |                                                      |
| 4  |                      |                      |                                                      |
| 5  | Data monitoring:     | <a href="#">#21a</a> | Composition of data monitoring committee             |
| 6  | formal committee     |                      | (DMC); summary of its role and reporting             |
| 7  |                      |                      | structure; statement of whether it is independent    |
| 8  |                      |                      | from the sponsor and competing interests; and        |
| 9  |                      |                      | reference to where further details about its         |
| 10 |                      |                      | charter can be found, if not in the protocol.        |
| 11 |                      |                      | Alternatively, an explanation of why a DMC is        |
| 12 |                      |                      | not needed                                           |
| 13 |                      |                      |                                                      |
| 14 |                      |                      |                                                      |
| 15 |                      |                      |                                                      |
| 16 |                      |                      |                                                      |
| 17 |                      |                      |                                                      |
| 18 | Data monitoring:     | <a href="#">#21b</a> | Description of any interim analyses and stopping     |
| 19 | interim analysis     |                      | guidelines, including who will have access to        |
| 20 |                      |                      | these interim results and make the final decision    |
| 21 |                      |                      | to terminate the trial                               |
| 22 |                      |                      |                                                      |
| 23 |                      |                      |                                                      |
| 24 | Harms                | <a href="#">#22</a>  | Plans for collecting, assessing, reporting, and      |
| 25 |                      |                      | managing solicited and spontaneously reported        |
| 26 |                      |                      | adverse events and other unintended effects of       |
| 27 |                      |                      | trial interventions or trial conduct                 |
| 28 |                      |                      |                                                      |
| 29 |                      |                      |                                                      |
| 30 |                      |                      |                                                      |
| 31 | Auditing             | <a href="#">#23</a>  | Frequency and procedures for auditing trial          |
| 32 |                      |                      | conduct, if any, and whether the process will be     |
| 33 |                      |                      | independent from investigators and the sponsor       |
| 34 |                      |                      |                                                      |
| 35 |                      |                      |                                                      |
| 36 |                      |                      |                                                      |
| 37 | <b>Ethics and</b>    |                      |                                                      |
| 38 | <b>dissemination</b> |                      |                                                      |
| 39 |                      |                      |                                                      |
| 40 | Research ethics      | <a href="#">#24</a>  | Plans for seeking research ethics committee /        |
| 41 | approval             |                      | institutional review board (REC / IRB) approval      |
| 42 |                      |                      |                                                      |
| 43 |                      |                      |                                                      |
| 44 | Protocol             | <a href="#">#25</a>  | Plans for communicating important protocol           |
| 45 | amendments           |                      | modifications (eg, changes to eligibility criteria,  |
| 46 |                      |                      | outcomes, analyses) to relevant parties (eg,         |
| 47 |                      |                      | investigators, REC / IRBs, trial participants, trial |
| 48 |                      |                      | registries, journals, regulators)                    |
| 49 |                      |                      |                                                      |
| 50 |                      |                      |                                                      |
| 51 |                      |                      |                                                      |
| 52 | Consent or assent    | <a href="#">#26a</a> | Who will obtain informed consent or assent from      |
| 53 |                      |                      | potential trial participants or authorised           |
| 54 |                      |                      | surrogates, and how (see Item 32)                    |
| 55 |                      |                      |                                                      |
| 56 |                      |                      |                                                      |
| 57 |                      |                      |                                                      |
| 58 |                      |                      |                                                      |
| 59 |                      |                      |                                                      |
| 60 |                      |                      |                                                      |

N/A: No safety/critical efficacy issues present

N/A: No safety/critical efficacy issues present

N/A: No safety/critical efficacy issues present

15

3

N/A

15

|    |                       |                      |                                                       |                         |
|----|-----------------------|----------------------|-------------------------------------------------------|-------------------------|
| 1  | Consent or assent:    | <a href="#">#26b</a> | Additional consent provisions for collection and      | N/A                     |
| 2  | ancillary studies     |                      | use of participant data and biological specimens      |                         |
| 3  |                       |                      | in ancillary studies, if applicable                   |                         |
| 4  |                       |                      |                                                       |                         |
| 5  |                       |                      |                                                       |                         |
| 6  | Confidentiality       | <a href="#">#27</a>  | How personal information about potential and          | Appendices              |
| 7  |                       |                      | enrolled participants will be collected, shared,      |                         |
| 8  |                       |                      | and maintained in order to protect confidentiality    |                         |
| 9  |                       |                      | before, during, and after the trial                   |                         |
| 10 |                       |                      |                                                       |                         |
| 11 |                       |                      |                                                       |                         |
| 12 |                       |                      |                                                       |                         |
| 13 | Declaration of        | <a href="#">#28</a>  | Financial and other competing interests for           | 15                      |
| 14 | interests             |                      | principal investigators for the overall trial and     |                         |
| 15 |                       |                      | each study site                                       |                         |
| 16 |                       |                      |                                                       |                         |
| 17 |                       |                      |                                                       |                         |
| 18 | Data access           | <a href="#">#29</a>  | Statement of who will have access to the final        | 15                      |
| 19 |                       |                      | trial dataset, and disclosure of contractual          |                         |
| 20 |                       |                      | agreements that limit such access for                 |                         |
| 21 |                       |                      | investigators                                         |                         |
| 22 |                       |                      |                                                       |                         |
| 23 |                       |                      |                                                       |                         |
| 24 |                       |                      |                                                       |                         |
| 25 | Ancillary and post    | <a href="#">#30</a>  | Provisions, if any, for ancillary and post-trial      | N/A: No safety/critical |
| 26 | trial care            |                      | care, and for compensation to those who suffer        | efficacy issues present |
| 27 |                       |                      | harm from trial participation                         |                         |
| 28 |                       |                      |                                                       |                         |
| 29 |                       |                      |                                                       |                         |
| 30 |                       |                      |                                                       |                         |
| 31 | Dissemination         | <a href="#">#31a</a> | Plans for investigators and sponsor to                | 15                      |
| 32 | policy: trial results |                      | communicate trial results to participants,            |                         |
| 33 |                       |                      | healthcare professionals, the public, and other       |                         |
| 34 |                       |                      | relevant groups (eg, via publication, reporting in    |                         |
| 35 |                       |                      | results databases, or other data sharing              |                         |
| 36 |                       |                      | arrangements), including any publication              |                         |
| 37 |                       |                      | restrictions                                          |                         |
| 38 |                       |                      |                                                       |                         |
| 39 |                       |                      |                                                       |                         |
| 40 |                       |                      |                                                       |                         |
| 41 |                       |                      |                                                       |                         |
| 42 | Dissemination         | <a href="#">#31b</a> | Authorship eligibility guidelines and any intended    | 16                      |
| 43 | policy: authorship    |                      | use of professional writers                           |                         |
| 44 |                       |                      |                                                       |                         |
| 45 |                       |                      |                                                       |                         |
| 46 | Dissemination         | <a href="#">#31c</a> | Plans, if any, for granting public access to the full | 15                      |
| 47 | policy: reproducible  |                      | protocol, participant-level dataset, and statistical  |                         |
| 48 | research              |                      | code                                                  |                         |
| 49 |                       |                      |                                                       |                         |
| 50 |                       |                      |                                                       |                         |
| 51 | <b>Appendices</b>     |                      |                                                       |                         |
| 52 |                       |                      |                                                       |                         |
| 53 |                       |                      |                                                       |                         |
| 54 | Informed consent      | <a href="#">#32</a>  | Model consent form and other related                  | Appendices              |
| 55 | materials             |                      | documentation given to participants and               |                         |
| 56 |                       |                      | authorised surrogates                                 |                         |
| 57 |                       |                      |                                                       |                         |
| 58 |                       |                      |                                                       |                         |
| 59 |                       |                      |                                                       |                         |
| 60 |                       |                      |                                                       |                         |

1 Biological specimens [#33](#) Plans for collection, laboratory evaluation, and 12  
2 storage of biological specimens for genetic or  
3 molecular analysis in the current trial and for  
4 future use in ancillary studies, if applicable  
5  
6  
7

8 None The SPIRIT Explanation and Elaboration paper is distributed under the terms of the Creative  
9 Commons Attribution License CC-BY-NC. This checklist can be completed online using  
10 <https://www.goodreports.org/>, a tool made by the [EQUATOR Network](#) in collaboration with  
11 [Penelope.ai](#)  
12  
13  
14  
15  
16  
17  
18  
19  
20  
21  
22  
23  
24  
25  
26  
27  
28  
29  
30  
31  
32  
33  
34  
35  
36  
37  
38  
39  
40  
41  
42  
43  
44  
45  
46  
47  
48  
49  
50  
51  
52  
53  
54  
55  
56  
57  
58  
59  
60

# BMJ Open

## Acute and repeated impact of sweeteners and sweetness enhancers in solid and semi-solid foods on appetite - protocol for a multi-centre, cross-over, RCT in people with overweight/obesity: The SWEET Project

|                                 |                                                                                                                                                                                                                                                                                                                                                                                                                                                                                                                                                                                                                                                                                                                                                                                                                                                                                                                                                                                                                                                                                                                                                                                                                                                                                                                                                                                                                                                                                                                                                                                                                                                                                                                                                                                                                                                                                                                                                                                                    |
|---------------------------------|----------------------------------------------------------------------------------------------------------------------------------------------------------------------------------------------------------------------------------------------------------------------------------------------------------------------------------------------------------------------------------------------------------------------------------------------------------------------------------------------------------------------------------------------------------------------------------------------------------------------------------------------------------------------------------------------------------------------------------------------------------------------------------------------------------------------------------------------------------------------------------------------------------------------------------------------------------------------------------------------------------------------------------------------------------------------------------------------------------------------------------------------------------------------------------------------------------------------------------------------------------------------------------------------------------------------------------------------------------------------------------------------------------------------------------------------------------------------------------------------------------------------------------------------------------------------------------------------------------------------------------------------------------------------------------------------------------------------------------------------------------------------------------------------------------------------------------------------------------------------------------------------------------------------------------------------------------------------------------------------------|
| Journal:                        | <i>BMJ Open</i>                                                                                                                                                                                                                                                                                                                                                                                                                                                                                                                                                                                                                                                                                                                                                                                                                                                                                                                                                                                                                                                                                                                                                                                                                                                                                                                                                                                                                                                                                                                                                                                                                                                                                                                                                                                                                                                                                                                                                                                    |
| Manuscript ID                   | bmjopen-2022-063903.R1                                                                                                                                                                                                                                                                                                                                                                                                                                                                                                                                                                                                                                                                                                                                                                                                                                                                                                                                                                                                                                                                                                                                                                                                                                                                                                                                                                                                                                                                                                                                                                                                                                                                                                                                                                                                                                                                                                                                                                             |
| Article Type:                   | Protocol                                                                                                                                                                                                                                                                                                                                                                                                                                                                                                                                                                                                                                                                                                                                                                                                                                                                                                                                                                                                                                                                                                                                                                                                                                                                                                                                                                                                                                                                                                                                                                                                                                                                                                                                                                                                                                                                                                                                                                                           |
| Date Submitted by the Author:   | 12-Aug-2022                                                                                                                                                                                                                                                                                                                                                                                                                                                                                                                                                                                                                                                                                                                                                                                                                                                                                                                                                                                                                                                                                                                                                                                                                                                                                                                                                                                                                                                                                                                                                                                                                                                                                                                                                                                                                                                                                                                                                                                        |
| Complete List of Authors:       | Gibbons, Catherine; University of Leeds, School of Psychology<br>O'Hara, Beverley; University of Leeds, School of Psychology<br>O'Connor, Dominic; University of Leeds, School of Psychology<br>Hardman, Charlotte; University of Liverpool, Institute of Population Health<br>Wilton, Moon; University of Liverpool, Institute of Population Health<br>Harrold, Joanne; University of Liverpool, Institute of Population Health<br>Almiron-Roig, Eva; University of Navarra, Centre for Nutrition Research; Navarra Institute for Health Research, IdiSNA<br>Navas-Carretero, Santiago; University of Navarra, Centre for Nutrition Research; Navarra Institute for Health Research, IdiSNA<br>Hodgkins, Charo ; University of Surrey, Food, Consumer Behaviour and Health Research Centre, School of Psychology<br>Nazare, Julie Anne; Rhône-Alpes Research Centre for Human Nutrition<br>Alligier, Maud; Rhône-Alpes Research Centre for Human Nutrition; French Obesity Research Centre of France<br>Martínez, Jose; University of Navarra, Centre for Nutrition Research; IMDEA, Precision Nutrition Program<br>Scott, Corey; Cargill Inc<br>Kjølbaek, Louise; University of Copenhagen, Department of Nutrition, Exercise and Sports<br>Normand, Mie; University of Copenhagen, Department of Nutrition, Exercise and Sports<br>Rannou, Cécile; Oniris, UMR CNRS GEPEA 6144<br>Blaak, Ellen; Maastricht University, School of Nutrition and Translational Research in Metabolism<br>Feskens, Edith; Wageningen University, Division of Human Nutrition and Health<br>Moshoyiannis, Hariklia; Bioaitriki S. A, International Reference Laboratory Services<br>Raben, Anne; University of Copenhagen, Department of Nutrition, Exercise & Sports; Steno Diabetes Center Copenhagen, Clinical Research<br>Halford, Jason; University of Leeds, School of Psychology<br>Beaulieu, Kristine; University of Leeds, School of Psychology<br>Finlayson, G; University of Leeds, School of Psychology |
| <b>Primary Subject Heading</b>: | Nutrition and metabolism                                                                                                                                                                                                                                                                                                                                                                                                                                                                                                                                                                                                                                                                                                                                                                                                                                                                                                                                                                                                                                                                                                                                                                                                                                                                                                                                                                                                                                                                                                                                                                                                                                                                                                                                                                                                                                                                                                                                                                           |

1  
2  
3  
4  
5  
6  
7  
8  
9  
10  
11  
12  
13  
14  
15  
16  
17  
18  
19  
20  
21  
22  
23  
24  
25  
26  
27  
28  
29  
30  
31  
32  
33  
34  
35  
36  
37  
38  
39  
40  
41  
42  
43  
44  
45  
46  
47  
48  
49  
50  
51  
52  
53  
54  
55  
56  
57  
58  
59  
60

|                            |                                                                                                                                                              |
|----------------------------|--------------------------------------------------------------------------------------------------------------------------------------------------------------|
| Secondary Subject Heading: | Public health                                                                                                                                                |
| Keywords:                  | Protocols & guidelines < HEALTH SERVICES ADMINISTRATION & MANAGEMENT, PUBLIC HEALTH, NUTRITION & DIETETICS, General endocrinology < DIABETES & ENDOCRINOLOGY |
|                            |                                                                                                                                                              |

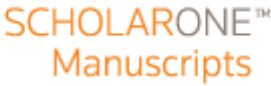

1  
2  
3 1 **Acute and repeated impact of sweeteners and sweetness enhancers in solid and semi-**  
4 **solid foods on appetite - protocol for a multi-centre, cross-over, RCT in people with**  
5 **overweight/obesity: The SWEET Project**  
6  
7  
8  
9

10 **Authors:** Catherine Gibbons<sup>1\*</sup>, Beverley O'Hara<sup>1\*</sup>, Dominic O'Connor<sup>1</sup>, Charlotte A  
11 Hardman<sup>2</sup>, Moon M Wilton<sup>2</sup>, Joanne A Harrold<sup>2</sup>, Eva Almiron-Roig<sup>3,4</sup>, Santiago Navas-  
12 Carretero<sup>3,4</sup>, Charo E Hodgkins<sup>5</sup>, Julie-Anne Nazare<sup>6</sup>, Maud Alligier<sup>6,7</sup>, J Alfredo Martinez<sup>3,8</sup>,  
13 Corey Scott<sup>9</sup>, Louise Kjølbaek<sup>10</sup>, Mie Normand<sup>10</sup>, Cécile Rannou<sup>11</sup>, Ellen E Blaak<sup>12</sup>, Edith J  
14 M Feskens<sup>13</sup>, Hariklia Moshoyiannis<sup>14</sup>, Anne Raben<sup>10,15</sup>, Jason C G Halford<sup>1</sup>, Kristine  
15 Beaulieu<sup>1</sup>, Graham Finlayson<sup>1</sup>  
16  
17  
18  
19

20  
21  
22 12 \*Contributed equally.  
23

24 13 Correspondence to Dr Catherine Gibbons; c.gibbons@leeds.ac.uk  
25  
26  
27

28 **Affiliations:**

29 16 <sup>1</sup>School of Psychology, Faculty of Medicine & Health, University of Leeds, UK

30 17 <sup>2</sup>Department of Psychology, Institute of Population Health, University of Liverpool, UK

31 18 <sup>3</sup>Centre for Nutrition Research, University of Navarra, Spain

32 19 <sup>4</sup>Navarra Institute for Health Research, IdiSNA, Pamplona, Spain

33 20 <sup>5</sup>Food, Consumer Behaviour and Health Research Centre, School of Psychology, University  
34 of Surrey, UK

35 21 <sup>6</sup>Human Nutrition Research Center Rhône-Alpes, Lyon 1 Claude Bernard University, France

36 22 <sup>7</sup>French Obesity Research Centre of Excellence, France

37 23 <sup>8</sup>Precision Nutrition Program, IMDEA, Madrid, Spain

38 24 <sup>9</sup>Core Research and Development, Cargill, Inc, USA

39 25 <sup>10</sup>Department of Nutrition, Exercise and Sports, University of Copenhagen, Denmark

40 26 <sup>11</sup>UMR CNRS GEPEA 6144, Oniris, France

41 27 <sup>12</sup>School of Nutrition and Translational Research in Metabolism, University of Maastricht,  
42 The Netherlands

43 28 <sup>13</sup>Division of Human Nutrition and Health, Wageningen University, Wageningen,  
44 Netherlands

45 29 <sup>14</sup>International Reference Laboratory Services, Bioiatriki S.A., Athens, Greece

46 30 <sup>15</sup>Clinical Research, Copenhagen University Hospital – Steno Diabetes Center Copenhagen,  
47 Herlev, Denmark  
48  
49  
50  
51  
52  
53  
54  
55  
56  
57  
58  
59  
60

|   |                         |
|---|-------------------------|
| 1 |                         |
| 2 |                         |
| 3 | 35                      |
| 4 |                         |
| 5 | 36                      |
| 6 |                         |
| 7 | 37                      |
| 8 | 38                      |
| 9 | <b>Word Count: 3874</b> |

For peer review only

10  
11  
12  
13  
14  
15  
16  
17  
18  
19  
20  
21  
22  
23  
24  
25  
26  
27  
28  
29  
30  
31  
32  
33  
34  
35  
36  
37  
38  
39  
40  
41  
42  
43  
44  
45  
46  
47  
48  
49  
50  
51  
52  
53  
54  
55  
56  
57  
58  
59  
60

## 39 Abstract

40 **Introduction:** Intake of free sugars in European countries is high and attempts to reduce  
41 sugar intake have been mostly ineffective. Non-nutritive sweeteners and sweetness enhancers  
42 (S&SEs) can maintain sweet taste in the absence of energy, but little is known about the  
43 impact of acute and repeated consumption of S&SE in foods these products on appetite. This  
44 study aims to evaluate the effect of acute and repeated consumption of 2 individual S&SEs  
45 and 2 S&SE blends in semi-solid and solid foods on appetite and related behavioural,  
46 metabolic and health outcomes.

47 **Methods and Analysis:** A work package of the SWEET project, this study consists of 5  
48 double-blind randomised cross-over trials which will be carried out at 5 sites across 4  
49 European countries, aiming to have n=213. Five food matrices will be tested across 3  
50 formulations (sucrose-sweetened control versus 2 reformulated products with S&SE blends  
51 and no added sugar). Participants (body mass index (BMI) 25-35 kg/m<sup>2</sup>; aged 18-60 years)  
52 will consume each formulation for 14 days. The primary endpoint is composite appetite score  
53 (hunger, inverse of fullness, desire to eat and prospective food consumption) over a 3-hour  
54 postprandial incremental area under the curve during clinical investigation days on day 1 and  
55 14.

56 **Ethics and dissemination:** The trial will be approved by national ethical committees before  
57 starting recruitment and will be conducted in accordance with the Declaration of Helsinki.  
58 Results will be published in international peer-reviewed open access scientific journals.  
59 Research data from the trial will be deposited in an open access online research data archive.

60 **Trial registration number:** Clinicaltrials.gov: NCT04633681

## 62 Strengths and Limitations of this study:

- 63 • The trial is the first of its kind to investigate the effects of acute and repeated exposure to  
64 2 individual S&SE and 2 S&SE blends in 5 different sweet food products across a variety  
65 of matrices including bakery (cakes and biscuits), dairy (yoghurt), confectionary  
66 (chocolate) and breakfast cereal.
- 67 • This trial includes a large range of outcomes across behaviour, physiology, and health  
68 from persons living in Northern, Central and Southern Europe.
- 69 • The COVID-19 pandemic resulted in changes to the design of the studies in the trial.  
70 Originally, all products were to be tested across 2 sites, but the reduced time frame means  
71 this is not possible for some products.



- 1  
2  
3 72 • Due to COVID-19 disruptions the number of participants in 2 of the 5 studies will be  
4 73 reduced. Blood samples will not be taken in one of these smaller studies. Outcomes will  
5 74 be reported descriptively in these 2 studies where appropriate.  
6  
7 75  
8  
9

## 10 76 **BACKGROUND AND RATIONALE**

11 77 The global increase in the prevalence of obesity and its associated diseases is driven by a  
12 78 range of internal factors, involving genetic, behavioural, and metabolic determinants along  
13 79 with permissive external factors from the physical, social, and public (nutritional) policy  
14 80 environment (1). One of the main behavioural drivers involves a diet too rich in energy intake  
15 81 relative to energy expenditure. Free sugar intake (derived from sugar added to foods and  
16 82 beverages by the manufacturer or consumer) is one nutritional component that has gained  
17 83 focus because of its low nutritional value (lack of vitamins, minerals or fibre) and its  
18 84 potential to add to overall energy consumed, facilitating weight gain (2), and potential altered  
19 85 appetite and endocrine responses to carbohydrates (sugars) relative to other macronutrients  
20 86 (3).

21 87 Simply restricting free sugars from the diet without substitution may reduce diet palatability  
22 88 or contribute to changes in sweet craving (4), particularly in women (5), resulting in poor  
23 89 acceptance.. The replacement of free sugars with non-nutritive sweeteners and sweetness  
24 90 enhancers (S&SEs) in food products is one method to reduce sugar intake while maintaining  
25 91 acceptance and palatability of the diet. S&SEs have increasingly been employed over recent  
26 92 years to reduce the energy and sugar content of foods; however, their impact on appetite- and  
27 93 health-related outcomes is somewhat unclear (6).

28 94 The effect of S&SEs on appetite is difficult to summarise due the types of studies,  
29 95 comparisons and S&SEs being used. One of the reasons for the current partial understanding  
30 96 of the appetitive and metabolic effects of S&SEs in humans is that different S&SEs are  
31 97 commonly assumed to have similar behavioural effects (6-8). Only recently, one 12-week  
32 98 investigation of 4 distinct S&SEs reported directionally dissimilar effects of saccharin  
33 99 compared to sucralose on body weight (9). A recent review comparing different S&SEs  
34 100 suggests that some have the potential to enhance appetite, but these effects do not follow  
35 101 through to subsequent energy intake (6). A recent meta-analysis detailed the impact of no- or  
36 102 low-energy sweetened preloads compared to conventionally sweetened preloads on *ad*  
37 103 *libitum* energy intake. They concluded that similar effects on energy intake were seen due to  
38 104 only partial compensation being evident (although total energy intake was lower in the no- or  
39 105 low-energy sweetener) (10). Furthermore, recent studies have highlighted that S&SEs may

1  
2  
3 106 reduce sweet food cravings and therefore reduce sugar intake (11) appetite and energy intake  
4  
5 107 (12). Overall, there is currently insufficient evidence to make a clear conclusion about the  
6  
7 108 effect of S&SEs on appetite and energy intake. Indeed, the 11 S&SEs that are currently  
8  
9 109 approved for use in the EU are chemically heterogeneous and absorbed, metabolised, and  
10  
11 110 excreted differently (13). Furthermore, most investigations of the relationship between S&SE  
12  
13 111 intake and health outcomes have used beverages as the vehicle (14) ; these have recently been  
14  
15 112 reviewed (15). Since the amount of S&SEs in the food supply is increasing in response to  
16  
17 113 consumer demand (16) and policy (e.g., 'sugar taxes'(17, 18); EU initiatives (19, 20)), there  
18  
19 114 is a pressing need to examine the appetite-related behavioural and metabolic consequences of  
20  
21 115 consuming S&SEs particularly in semi-solid and solid food matrices. Furthermore, it should  
22  
23 116 be acknowledged that differences between acute and longer-term effects of S&SEs may not  
24  
25 117 be the same (21) and this needs investigating further.

118

## 119 **AIMS AND OBJECTIVES**

120 The main objective of this study is to evaluate the acute (1-day) and repeated (14-day) effects  
121 of 2 individual S&SEs and 2 S&SE blends in reformulated reduced or no added sugar food  
122 products (using 2 modulations of S&SEs per matrix) on appetite and related behavioural,  
123 metabolic and health outcomes in adult men and women with overweight or obesity.

124 The hypotheses are:

125 **H<sub>1</sub>** Consumption of no added/reduced sugar products reformulated with S&SEs will result in  
126 an altered incremental area under the curve (iAUC) appetite score, compared with the  
127 sucrose-sweetened control product after repeated compared with acute consumption.

128

129 **H<sub>2</sub>** There will be differences between the no added/reduced sugar and sucrose-sweetened  
130 formulations on behavioural (e.g., food reward and preferences, food cravings, self-reported  
131 energy intake), metabolic (satiety peptides, glycaemic and lipaemic response) and health-  
132 related (liver function and gastrointestinal (GI) side effects) outcomes.

133

## 134 **TRIAL DESIGN**

135 This study is part of the wider SWEET project (<https://sweetproject.eu/>) funded by the  
136 European Commission Horizon 2020 program. It is a multicentre double-blind, randomised

1  
2  
3 137 cross-over trial conducted across 5 intervention sites in 4 countries, with 3 product  
4  
5 138 formulations (sucrose-sweetened control vs 2 individual S&SEs or S&SE blends) over 5  
6  
7 139 intervention product types (cake, biscuits, yoghurt, chocolate, and breakfast cereal matrices)  
8  
9 140 aiming for a total of 213 completers. The protocol is reported as per the SPIRIT reporting  
10  
11 141 guidelines (22). While this study addresses the short term impact of specific S&SEs vs added  
12  
13 142 sucrose on appetite, another work package in the SWEET project will examine the long term  
14  
15 143 (1-year) impact of a weight loss and weight maintenance intervention with or without S&SE  
16  
17 144 as part of a healthy diet (bmjopen-2022-061075).

145

### 146 ***Sample Size Determination***

147 The following calculations apply to the studies involving biscuit, yoghurt and chocolate  
148 matrices:

149 Primary outcome: Power calculations showed that to detect a minimum difference of 8 mm in  
150 appetite ratings on a 100 mm visual analogue scale (VAS) with 80% power, alpha 0.05, and  
151 based on a published within-subject SD of 14.4 mm in VAS measures (23), an overall sample  
152 of 53 completers (both sexes, same BMI group, across all centres) would be needed (24; p.30)  
153 per matrix. We expect this sample size will be sufficient to detect iAUC differences in the  
154 appetite response relative to control of around 8–10%, considered to be of practical relevance  
155 (25).

156 Secondary outcomes: Due to the number of secondary outcomes in this study, it was not  
157 feasible to conduct power calculations for all outcomes. However, we consulted published  
158 studies (e.g. Yeomans et al, 2016 (24)) which utilized a similar design and demonstrated  
159 effects of small nutritional manipulations on various gut peptides. In these studies, sample sizes  
160 ranged from 12-23 participants, giving us confidence that a sample of 53 participants per matrix  
161 should be sufficient to detect differences with clinical significance.

162 Due to the impact of the COVID-19 pandemic on the trial (detailed later), the cake and  
163 breakfast cereal studies were scaled down according to reduced feasibility at each intervention  
164 centre to n=24 (cake) and n=30 (breakfast cereal), and no blood samples will be collected in  
165 the cake study. The primary outcome will be reported descriptively in these 2 studies where  
166 appropriate and reflected in the study registration and protocol.

### 167 **STUDY SETTING**

1  
2  
3 168 This trial is conducted across 5 intervention sites in 4 countries across 3 regions of Europe,  
4  
5 169 with each site testing a different product, whilst following the same protocol. Western  
6  
7 170 Europe: Leeds (University of Leeds, UK) will test biscuits; Liverpool (University of  
8  
9 171 Liverpool, UK) will test chocolate; Lyon (Centre de Recherche en Nutrition Humaine Rhône  
10  
11 172 Alpes, France) will test biscuits and cakes. Northern Europe: Copenhagen (University of  
12  
13 173 Copenhagen, Denmark) will test cereal. Southern Europe: Pamplona (University of Navarra,  
14  
15 174 Spain) will test yoghurt. University's of Leeds and Navarra are the leaders of this work  
16  
17 175 package, whilst University of Liverpool is the co-ordinating centre of the SWEET project in  
18  
19 176 its entirety.

## 20 177 **PATIENT AND PUBLIC INVOLVEMENT**

21  
22 178 During the study, research staff discuss with participants about their experiences of the  
23  
24 179 clinical investigation days, examinations, participant information and written materials, etc.  
25  
26 180 with the aim to understand and improve participants' experiences in current and future  
27  
28 181 studies of this nature. This is also captured in an end of study survey.

## 30 182 **ELIGIBILITY CRITERIA**

31  
32 183 Male and female adults aged 18-60 years, with a BMI 25-35 kg/m<sup>2</sup> are eligible. Participants  
33  
34 184 are required to regularly consume sugar-containing foods and willing to consume sugar and  
35  
36 185 sweetened food products. During screening, they must have an Eating Attitudes Test (EAT-  
37  
38 186 26) (26) score <20 and a short sweet food frequency questionnaire score  $\geq 3$  of 11, in addition  
39  
40 187 to rating the control product as  $\geq 40\%$  on a 100-point liking VAS during the taste test and be  
41  
42 188 willing to consume the product during the duration of the trial. All exclusion criteria are  
43  
44 189 listed in **Supplemental Material 1**.

## 46 191 **INTERVENTION**

47  
48 192 Each trial will begin with an initial exposure to one of the 3 assigned product formulations  
49  
50 193 under controlled laboratory conditions (clinical investigation day, CIDs 1, 3, 5 – exposure  
51  
52 194 day 1), followed by repeated daily consumption of the same product at home for 12 ( $\pm 2$   
53  
54 195 days) and a final exposure in the laboratory on day 14 ( $\pm 2$  days) under identical conditions as  
55  
56 196 the first exposure (CIDs 2, 4, 6 – exposure day 14), resulting in all participants completing  
57  
58 197 the 3 products formulations in a Latin square design (see Figure 1). CIDs 2 and 4 will be  
59  
60 198 followed by a wash out period of 14-21 days between formulations. During the at-home  
199  
200 199 periods, participants will consume a portion of the product at a time and place they choose

1  
2  
3 200 using a substitution strategy for similar energy/sweetness foods in their habitual diet. Foods  
4  
5 201 habitually consumed of an equivalent energy density/sweetness are identified using  
6  
7 202 participant's answers to a food frequency questionnaire and an energy equivalent guide, with  
8  
9 203 a decision making tree developed to identify the most suitable foods to substitute for each  
10  
11 204 intervention product. This strategy is supported by advice and agreement from the research  
12  
13 205 officer/dietitian. Compliance will be monitored by an intervention booklet completed daily  
14  
15 206 and by return of empty food packaging. All food products are provided in the same blinded  
16  
17 207 container/wrapping. The study duration for each participant will be a minimum of 70 days  
18  
19 208 (plus 7-14 days allowance for extended washout to aid scheduling of CIDs).

209

### 210 **Recruitment and Screening**

211 Participants will be recruited via a variety of routes e.g., study databases, webpages, social  
212 media, posters, and flyers. Potential participants will be pre-screened using an online or  
213 telephonic pre-screening questionnaire in accordance with the inclusion and exclusion  
214 criteria. Candidates passing pre-screening will be invited to attend an information session,  
215 either online or in-person, where they will be given detailed information about the study and  
216 invited to participate in a Q&A session. Candidates who wish to participate in the study will  
217 provide written informed consent and sign a general data protection regulation (GDPR) form  
218 before being fully screened. The screening session will be performed in-person or online, and  
219 will consist of anthropometric measurements (height, weight, waist and hip circumference;  
220 all confirmed in-person at CID1 for participants being screened online); eligibility  
221 questionnaires (EAT-26 (26) and short sweet food frequency questionnaire); baseline  
222 questionnaires (A socio-demographic questionnaire, a questionnaire to assess habitual sweet  
223 food consumption, including regular and S&SE sweet foods (SWITCH sweet food frequency  
224 questionnaire (SWFFQ)) (27), a questionnaire to assess habitual physical activity  
225 (International Physical Activity Questionnaire (IPAQ)) (28) and a consumer perspective  
226 questionnaire); an eligibility taste test of the control intervention product here participants  
227 rated the pleasantness of the product on a 100mm VAS after taking one bite and chewing for  
228 5 seconds (a score of >40mm was required for inclusion into the study). Candidates who pass  
229 the screening session will be enrolled into the study.

230

### 231 **Randomisation and blinding**

232 A Latin square design (6 treatment orders) will be used to randomly allocate product  
233 sequence into blocks of 6, as shown in Figure 1. The person responsible for generating the

1  
2  
3 234 sequences for all sites will not have any study related tasks e.g., inclusion or examination of  
4  
5 235 participants. Each sequence will be stratified by sex (female/male) and age group (18-45  
6  
7 236 years/46-60 years). When feasible, a female/male ratio of minimum 60/40 was also  
8  
9 237 considered to reflect the target population characteristics.

10 238 Blinding of the intervention products (reformulated and control products) will be done by the  
11  
12 239 manufacturers. As such, blinding of the research and central laboratory staff will take place  
13  
14 240 allowing for a double-blind intervention. Moreover, the statistical analyses of the main  
15  
16 241 outcome variable will be done without breaking the intervention product-assignment code  
17  
18 242 before the analyses are finalised.

19 243

20 244

21  
22 245 **[Figure 1]**

23 246

### 24 247 **Clinical investigation days**

25  
26 248 Prior to each CID, participants will be asked to consume a similar evening meal at the same  
27  
28 249 time, before fasting for a minimum of 12 hours and a maximum of 15 hours. High intensity  
29  
30 250 physical activity, alcohol, and coffee will not be allowed for 12 hours before arriving to the  
31  
32 251 laboratory. Two glasses, approximately 500 mL, of non-carbonated water will be allowed  
33  
34 252 during the fasting period. Participants will provide a spot urine sample collected max 24  
35  
36 253 hours before each CID and will be analysed for the presence of specific S&SEs.

37 254

38  
39 255 The CID procedures are outlined in Figure 2. CID start times will be scheduled in the  
40  
41 256 morning between 8.00 am and 10.30 am and participants will start all 6 CIDs at the same  
42  
43 257 time. Participants will complete a protocol compliance questionnaire to verify the above  
44  
45 258 requirements regarding diet, physical activity, etc. If compliance has been breached, staff will  
46  
47 259 reschedule the CID (within the maximum 14 days allowed, otherwise a protocol deviation  
48  
49 260 will be recorded). If compliance has been achieved, participants will then fill in the Control  
50  
51 261 of Eating Questionnaire (CoEQ)(29) to assess cravings over the last 7 days, followed by a  
52  
53 262 body weight measurement. Participants will consume 200 mL of water before having an  
54  
55 263 intravenous cannula inserted into an antecubital vein by qualified personnel. A baseline  
56  
57 264 fasting blood sample will be taken 15 minutes after insertion of the cannula. Once the fasting  
58  
59 265 sample has been taken, participants will complete fasting subjective appetite ratings for  
60  
266 hunger, fullness, thirst, desire to eat, prospective intake, nausea, bloating, appetite for



1  
2  
3 267 something savoury and for something sweet on a validated 100-point VAS accessed via a PC  
4  
5 268 or a tablet (30, 31). These measures will be completed on an electronic Questionnaire  
6  
7 269 Delivery Platform (QDP), using separate screens for each VAS. Next, food reward will be  
8  
9 270 measured using a culturally adapted version of the Leeds Food Preference Questionnaire  
10  
11 271 (LFPQ)(32) on a computer desktop. Appetite sensations measured by VAS will be repeated  
12  
13 272 after the LFPQ and before the researcher brings the blinded intervention product served with  
14  
15 273 200 mL of water. The participant will be instructed to take one bite, then answer questions  
16  
17 274 regarding sensory-specific satiety and expected satiety by VAS (33, 34). The participant will  
18  
19 275 be asked to consume the rest of the product over a period of 5-10 minutes, depending on the  
20  
21 276 time required to consume the matrix and asked to complete a set of appetite sensation  
22  
23 277 questions by VAS at 10 min, followed by blood samples at 7-10 and 12-15 min to capture  
24  
25 278 peak PP response (35) (yoghurt will be consumed faster than other products therefore blood  
26  
27 279 samples will be taken earlier for this matrix). VAS for assessment of appetite sensation will  
28  
29 280 then be taken at 20, 30, 45, 60, 120 and 180 min with blood samples taken after VAS at 30,  
30  
31 281 60 and 120 min. The LFPQ will be repeated in the fed state after the 20-min VAS. In  
32  
33 282 between measurements, participants will remain seated in a quiet area, free from food-related  
34  
35 283 sensory stimuli and read/listen to music/use a computer (provided there is no material with  
36  
37 284 reference to food/drink). Once the 180-min appetite sensation questions by VAS is complete  
38  
39 285 the participant will be offered water or a snack before leaving the laboratory. Participants will  
40  
41 286 be reminded about the consumption of the products at home and that they will receive a  
42  
43 287 phone call the next day to complete a 24-hour diet recall and report any GI symptoms.  
44  
45 288 Following the end of the trial, participants will be debriefed if requested and offered the  
46  
47 289 chance to complete a survey about the conduct of the study.  
48

49  
50  
51  
52  
53  
54  
55  
56  
57  
58  
59  
60  
[Figure 2]

### 295 **Intervention products**

296 There will be 1 control product (sucrose-containing manufactured products) and 2 no  
297 added/reduced sugar reformulated products based on the same food matrix - including 2  
298 modulations of S&SE content (inclusion as individual S&SE or S&SE blends). The  
299 reformulated products have a target of  $\geq 30\%$  reduction in energy and/or sugar to achieve the  
300 status of 'reduced sugar' by EU regulation No 1047/2012. This will not be possible in all  
301 products, therefore 'no added sugar' will be applied to products who do not meet the criteria

302 (biscuits and cakes). The control products will range from 305-360 kcal (1286-1516 kJ),  
 303 while the intervention products will range from 242-326 kcal (1013-1368 kJ) (full product  
 304 nutritional information in **Supplemental Material 2**). Intervention and control products will  
 305 be matched for sweetness intensity, flavour and physical appearance.

306

307 The 2 individual S&SEs selected based on published literature were Neotame and Stevia  
 308 Rebaudioside M (in the biscuits and cakes) and 2 further S&SE blends were  
 309 Sucralose/Acesulfame K blend and Mogroside V/Stevia Rebaudioside M blend (in yoghurt,  
 310 chocolate and cereal), selected based on the results of a preliminary study using a beverage  
 311 matrix (manuscript in preparation).

312

### 313 Data Collection and Outcomes

314 Table 1 Details at which time point(s) data are collected at the CID.

315

316 **Table 1:** Data Collection and Timepoints for each CID

|                              |                                                                                               | Baseline<br>or 0' (fasting) | 10' | 15' | 20' | 30' | 45' | 60' | 120' | 180' | Next<br>day |
|------------------------------|-----------------------------------------------------------------------------------------------|-----------------------------|-----|-----|-----|-----|-----|-----|------|------|-------------|
| <b>Primary endpoint</b>      | Subjective appetite (VAS for hunger, desire to eat, fullness, prospective food consumption)   | X                           | X   |     | X   | X   | X   | X   | X    | X    |             |
| <b>Behavioural endpoints</b> | Food preference & reward (LFPQ)                                                               | X                           |     |     | X   |     |     |     |      |      |             |
|                              | Food cravings (CoEQ)                                                                          | X                           |     |     |     |     |     |     |      |      |             |
|                              | Energy intake (24-hour dietary recall)                                                        |                             |     |     |     |     |     |     |      |      | X           |
|                              | Expected satiety                                                                              | X (1 bite)                  |     |     |     |     |     |     |      |      |             |
|                              | Sensory-specific satiety                                                                      | X (1 bite)                  | X   |     |     |     |     |     |      |      |             |
|                              | Other appetite ratings (e.g., thirst, nausea, bloating, appetite for something sweet/savoury) | X                           | X   |     | X   |     | X   | X   | X    | X    |             |
| <b>Metabolic endpoints</b>   | Glucose and insulin                                                                           | X                           | X   | X   |     | X   |     | X   | X    |      |             |
|                              | Pancreatic polypeptide (PP)*                                                                  | X                           | X   | X   |     | X   |     |     |      |      |             |
|                              | GLP-1 and ghrelin                                                                             | X                           |     |     |     | X   |     | X   |      |      |             |
|                              | Lipaemia (triglycerides, total cholesterol, HDL-cholesterol, and LDL-cholesterol)             | X                           |     |     |     | X   |     | X   | X    |      |             |
| <b>Health endpoints</b>      | Liver function (ALT, AST, GGT, FL index, TyG index)                                           | X                           |     |     |     |     |     |     | X    |      |             |
|                              | HbA1c                                                                                         | CID1 & 6                    |     |     |     |     |     |     |      |      |             |
|                              | 24-hour GI side effects (self-report)                                                         |                             |     |     |     |     |     |     |      |      | X           |

317 \* Timepoints for PP are earlier for yoghurt study

318 *Abbreviations:* ALT - alanine transaminase, AST – aspartate transaminase, GGT - gamma-  
 319 glutamyltransferase, FL index - fatty liver index, TyG index - triglycerides and glucose index  
 320 VAS - visual analogue scale, LFPQ - Leeds Food Preference Questionnaire, CoEQ - Control



1  
2  
3 321 of Eating questionnaire, GLP-1- Glucagon-like peptide 1, HDL - High density lipoprotein,  
4 322 LDL - Low density lipoprotein, HbA1c - Haemoglobin A1c, GI - Gastrointestinal, CID -  
5 323 Clinical Investigation Day.  
6  
7

8 324  
9

### 10 325 **Primary Outcome**

11 326 This trial has one primary outcome which is the iAUC for the 180-minute composite appetite  
12 327 score based on hunger, fullness (reverse scored), desire to eat and prospective food  
13 328 consumption (36). These subjective appetite ratings will be measured throughout the CIDs  
14 329 using VAS on the QDP. The trapezoid method will be used for the calculation of iAUC (25).  
15  
16  
17  
18

19 330

### 20 331 **Secondary Outcomes**

#### 21 332 *Food preference and reward*

22 333 Food preference and food reward will be measured at all CIDs using the LFPQ (32). Changes  
23 334 will be determined by comparing the relative preference/food choice, explicit liking and  
24 335 implicit wanting for high-fat sweet, low-fat sweet, high-fat savoury and low-fat savoury  
25 336 foods, and fat/sweet appeal bias scores in the fed and hungry states between the reformulated  
26 337 and control products.  
27  
28  
29  
30

31 338

#### 32 339 *Food cravings*

33 340 Food cravings will be determined at all CIDs by craving control, craving for sweet and  
34 341 savoury scores from the CoEQ (29), which is a 21-item questionnaire with responses  
35 342 recorded on a 100-point VAS (1 item allows for text response).  
36  
37  
38  
39

40 343

#### 41 344 *Energy intake*

42 345 Energy intake will be measured by a 24-hour dietary recall (using the multiple pass method  
43 346 (37)), which will be conducted by a trained dietitian or research staff over the telephone.

44 347 Participants will be asked to recall all food and drink consumed during the 24-hour period  
45 348 since leaving the laboratory. Participants will receive training on reporting food portions  
46 349 using the Australian Health Survey Food Model Booklet (38) or similar culturally adapted  
47 350 resources.  
48  
49

50 351 Compensatory eating behaviour will be determined from the analysis of the 24-hour dietary  
51 352 interview data using energy intakes calculated with national nutritional software. The following  
52 353 variables will be considered: 1) Energy and macronutrient distribution and 2) Percent energy  
53  
54  
55  
56  
57  
58  
59  
60

1  
2  
3 354 compensation (%EC), defined as the adjustment of energy intake (EI) provoked by the  
4 intervention products (39), (see **Supplemental Material 3** for further information).  
5  
6  
7 356

8 357 ***Expected satiety and sensory specific satiety***

9  
10 358 Expected satiety will be measured by the Expected Satiety (ESAT) questionnaire (33, 40) and  
11 sensory specific satiety will be measured by the Sensory-Specific Satiety (SSS) questionnaire  
12 (34) after one bite and full consumption (10') of the product. Responses to both  
13 questionnaires are recorded on a 100-point VAS completed on the QDP. ESAT and SSS will  
14 be recorded on all CIDs (see **Supplemental Material 4** for details of each VAS).  
15  
16  
17  
18  
19 363

20 364 ***Other behavioural ratings***

21  
22 365 Subjective ratings of thirst, nausea, bloating, appetite for sweet and appetite for savoury will  
23 be recorded using 100-point VAS on the QDP regularly throughout the CIDs (Table 1).  
24  
25  
26 367

27 368 ***Biochemical measures***

28  
29 369 Blood for plasma analyses will be centrifuged at 1500 g at 4°C for 10 minutes immediately  
30 after being collected. Blood for serum analyses will be left to clot for 30-60 minutes before  
31 being centrifuged. Whole blood samples for DNA and HbA1c will be frozen immediately  
32 after collection. Plasma and serum aliquots will be stored at -80°C until shipment for  
33 analyses to Bioaitriki Laboratories (central lab) in Athens, Greece.  
34  
35  
36 373 Insulin concentrations will be determined by chemiluminescent microparticle immunoassay  
37 (CMIA) (Abbott Laboratories) using an Abbott Alinity i automated immunoassay system.  
38  
39 375 Ghrelin, GLP-1 and PP concentrations will be determined by ELISA, using an open  
40 automated ELISA system. Haemoglobin A1c will be determined by enzymatic assay  
41 (Abbott) which consists of two separate concentration measurements: glycated haemoglobin  
42 (HbA1c) and total haemoglobin. The two concentrations are used to determine the percent  
43 HbA1c (NGSP units) or the haemoglobin fraction in mmol/mol (IFCC units). Triglycerides  
44 will be determined by glycerol phosphate oxidase method (Abbott). Total cholesterol will be  
45 determined by enzymatic (oxidase, esterase and peroxidase) analysis (Abbott). Glucose  
46 concentrations will be determined by enzymatic (Hexokinase/G-6-PDH) (Abbott). HDL-  
47 cholesterol will be determined by an accelerator selective detergent method (Ultra HDL  
48 assay, Abbott) and LDL-cholesterol by a selective resolution of LDL-Particles under dye  
49 formation method (Direct LDL assay, Abbott). AST and ALT will be determined by  
50 enzymatic (NADH (without P-5'-P)) assays and GGT by enzymatic, L-Gamma glutamyl-3-  
51  
52  
53  
54  
55  
56  
57  
58  
59  
60 387

1  
2  
3 388 carboxy-4-nitroanilide substrate (Abbott). All biochemistry parameters will be analysed by an  
4  
5 389 Abbott Alinity c analyser. Fatty liver index and triglyceride glucose index will be calculated  
6  
7 390 according to information provided in **Supplemental Material 5**.

8  
9 391

### 10 392 *Gastrointestinal (GI) side effects*

11 393 Any reported unusual GI side effects, including abdominal pain/cramps, heartburn, stomach  
12  
13 394 acid/reflux, nausea, vomiting, abdominal rumbling, bloating, belching, excess gas/wind,  
14  
15 395 bowel movements, stool type, etc. during the study will be recorded at the phone call the day  
16  
17 396 after each CID and each day during the at-home intervention in a booklet including the  
18  
19 397 Bristol Stool Form Scale (41). The GI symptoms check has been based on the validated  
20  
21 398 Gastrointestinal Symptoms Rating Scale (GSRS) tool (42).

22 399

### 24 400 **STATISTICAL ANALYSIS PLAN**

26 401 Per protocol analysis will include participants that completed all 6 CIDs and had a level of  
27  
28 402 adherence to the product consumption >80%. The main evaluations for this trial will be to  
29  
30 403 investigate differences between the intervention products (2 no added/reduced sugar  
31  
32 404 reformulated S&SE products and 1 sucrose-sweetened control). Where this is not appropriate  
33  
34 405 for some of the secondary outcomes, descriptive analyses will be used to interpret  
35  
36 406 differences. Data will be pooled across the split-site (Leeds and Lyon) study using the biscuit  
37  
38 407 matrix. Data will be presented as means and standard deviation. Outcome variables will be  
39  
40 408 checked for normality and transformed where necessary. To account for any missing data,  
41  
42 409 analyses will be conducted using linear mixed models. Models will compare S&SE product  
43  
44 410 conditions vs. sucrose control in a 3 (S&SE1, S&SE2, sucrose control) x 2 (exposure day 1  
45  
46 411 and exposure day 14) within-subject design. Model parameters will be adjusted to obtain the  
47  
48 412 best model fit. Adjustments for covariates (e.g. age, gender, BMI, intervention site,  
49  
50 413 compliance, protocol deviations, adverse events and concomitant medication) will be applied  
51  
52 414 as necessary, e.g. in the event that they influence outcomes. Analyses will be reported as both  
53  
54 415 unadjusted and adjusted models. The American Statistical Association's policy statement on  
55  
56 416 p-values (43) advises that all p-values from specified statistical models be reported along  
57  
58 417 with point estimates, effect size and confidence intervals to help interpret the compatibility of  
59  
60 418 the data with the study outcomes, therefore this procedure will be followed. Otherwise, the  
419  
420 419 level of significance will be set at 0.05.

1  
2  
3 421 ***Safety analysis***  
4

5 422 Information relating to adverse events (including events relating to GI side effects) and  
6 423 concomitant medication will be tabulated and summarised descriptively.  
7  
8

9 424

10  
11 425 **ETHICS AND MONITORING**  
12

13 426 Each intervention site will obtain ethical approval from their local ethical committee. All  
14 427 study procedures will be conducted in accordance with the Helsinki Declaration and the study  
15 428 protocol has been registered in a public database (clinicaltrials.gov NTC04633681;  
16 429 **Supplemental Material 6**). To the extent relevant and reasonable International Council for  
17  
18 430 Harmonisation Good Clinical Practice (ICH-GCP) guidelines will be used, and standard  
19 431 operating procedures (SOP) will be developed to facilitate the same performance and  
20 432 compliance with the protocol in each centre. All personal data is handled confidentially and  
21 433 stored in accordance with applicable law, GDPR and local laws (see **Supplemental Material**  
22 434 **7**). All participants will receive written and oral information about the study and only trained  
23 435 study personnel will provide information, monitor and attest signing of the informed consent  
24 436 form. Where required, monitoring of intervention sites will be performed during the study by  
25 437 the University of Navarra depending on local regulations.  
26  
27  
28  
29  
30  
31  
32  
33

34 438

35 439 **TRIAL STATUS**  
36

37 440 The COVID pandemic had a large impact on access to infrastructure and services across all  
38 441 intervention centres. For example, research was halted in some institutions or fewer  
39 442 participants could be scheduled per visit (restrictions related to distance and number of social  
40 443 contacts), recruitment of new staff was frozen, new risk assessments were required, ethical  
41 444 review processes were restricted or extremely prolonged because COVID-related protocols  
42 445 were prioritized, procurement of supplies, consumables and services was suspended, and IT  
43 446 and administrative support was restricted. Further, face-to-face clinical work was put under  
44 447 strain. There were also challenges regarding staff and volunteer sickness plus overall  
45 448 volunteer reluctance to engage in clinical trials affecting the speed of recruitment and testing.  
46 449 Nevertheless, recruitment opened in May 2021 for the trial at the Leeds and Lyon intervention  
47 450 centres using the biscuit matrix, with last participant last visit completed in June 2022 for Leeds  
48 451 and expected by October 2022 for Lyon. Recruitment for the trial at Lyon using the cake matrix  
49 452 opened in February 2022. The trials at Liverpool and Pamplona started recruiting in Spring  
50 453 2022, and Copenhagen are still awaiting ethical approval (August 2022).  
51  
52  
53  
54  
55  
56  
57  
58  
59  
60

1  
2  
3 4544  
5 **455 PUBLICATION**

6 456 After completion of the study, the findings will be submitted for publication in an  
7 457 international peer-reviewed scientific open access journal and other relevant media. Research  
8 458 data from the trial will be deposited in an open access online research data archive (for  
9 459 example Zenodo).

10  
11  
12 46013  
14  
15 **461 FUNDING STATEMENT**

16 462 The present study is funded by the Horizon 2020 program: Sweeteners and sweetness  
17 463 enhancers: Impact on health, obesity, safety and sustainability (acronym: SWEET, grant no:  
18 464 774293). The current study was initiated by Prof. G. Finlayson as part of the Work Package 2  
19 465 of the SWEET project. The study receives funding from the Horizon2020 program (9 million  
20 466 Euros) to cover salary for project personnel, supplies, remuneration and dissemination of  
21 467 results. The amount is deposited in a project account subject to public revision. The funder  
22 468 has no role in the study design, interpretation of data or publication of material.

23  
24  
25  
26  
27  
28  
29 46930  
31 **470 COMPETING INTERESTS STATEMENT**

32 471 JCGH, JAH and CAH and are in receipt of research funding from the American Beverage  
33 472 Association. CAH has received honoraria from the International Sweeteners Association.  
34 473 ARA has received honoraria from Unilever and the International Sweeteners Association.  
35 474 CH's research centre provides consultancy to and has received travel funds to present  
36 475 research results from organisations supported by food and drink companies. CS is a paid  
37 476 employee of Cargill, Inc.

38  
39  
40  
41  
42  
43  
44 **477 AUTHORS' CONTRIBUTIONS**45  
46  
47 478

48 479 The SWEET EU-project was initiated by JH, JCGH and AR. The protocol for the present  
49 480 SWEET work package intervention trial was written by CG, CHa, EA-R, SN-C, CHo, J-AN,  
50 481 JAM, CS, EB, EF, HM, KB and GF, with all contributing to the design of the trial along with  
51 482 BO'H, DO'C, MW, MA, MN, CR. JAM, GF, J-AN, AR and CHa are principal investigators  
52 483 (PI) at the 5 intervention sites. CG and BO'H drafted the manuscript and EA-R, SN-C, MW,  
53 484 CS, LK, AR, KB and GF critically reviewed the manuscript. All authors read and approved  
54 485 the final manuscript. Responsible author is CG.

55  
56  
57  
58  
59  
60

486 **REFERENCES**

- 487 1. Mitchell NS, Catenacci VA, Wyatt HR, Hill JO. Obesity: overview of an epidemic.  
488 *Psychiatr Clin North Am.* 2011;34(4):717-32.
- 489 2. World Health Organisation. Guideline: Sugars intake for adults and children. Geneva:  
490 World Health Organisation; 2015.
- 491 3. San-Cristobal R, Navas-Carretero S, Martínez-González MÁ, Ordovas JM, Martínez  
492 JA. Contribution of macronutrients to obesity: implications for precision nutrition. *Nature*  
493 *Reviews Endocrinology.* 2020;16(6):305-20.
- 494 4. Anguah KO, Syed-Abdul MM, Hu Q, Jacome-Sosa M, Heimowitz C, Cox V, et al.  
495 Changes in Food Cravings and Eating Behavior after a Dietary Carbohydrate Restriction  
496 Intervention Trial. *Nutrients.* 2019;12(1).
- 497 5. Zellner DA, Garriga-Trillo A, Rohm E, Centeno S, Parker S. Food Liking and  
498 Craving: A Cross-cultural Approach. *Appetite.* 1999;33(1):61-70.
- 499 6. O'Connor D, Pang M, Castelnuovo G, Finlayson G, Blaak E, Gibbons C, et al. A  
500 rational review on the effects of sweeteners and sweetness enhancers on appetite, food  
501 reward and metabolic/adiposity outcomes in adults. *Food Funct.* 2021;12(2):442-65.
- 502 7. Hunter SR, Reister EJ, Cheon E, Mattes RD. Low Calorie Sweeteners Differ in Their  
503 Physiological Effects in Humans. *Nutrients.* 2019;11(11):2717.
- 504 8. Pang MD, Goossens GH, Blaak EE. The Impact of Artificial Sweeteners on Body  
505 Weight Control and Glucose Homeostasis. *Frontiers in nutrition.* 2021;7:598340-.
- 506 9. Higgins KA, Mattes RD. A randomized controlled trial contrasting the effects of 4  
507 low-calorie sweeteners and sucrose on body weight in adults with overweight or obesity. *The*  
508 *American Journal of Clinical Nutrition.* 2019;109(5):1288-301.
- 509 10. Lee HY, Jack M, Poon T, Noori D, Venditti C, Hamamji S, et al. Effects of  
510 Unsweetened Preloads and Preloads Sweetened with Caloric or Low-/No-Calorie Sweeteners  
511 on Subsequent Energy Intakes: A Systematic Review and Meta-Analysis of Controlled  
512 Human Intervention Studies. *Adv Nutr.* 2021;12(4):1481-99.
- 513 11. Rogers PJ, Ferriday D, Irani B, Hei Hoi JK, England CY, Bajwa KK, et al. Sweet  
514 satiation: Acute effects of consumption of sweet drinks on appetite for and intake of sweet  
515 and non-sweet foods. *Appetite.* 2020;149:104631.
- 516 12. Stamatakis NS, Crooks B, Ahmed A, McLaughlin JT. Effects of the Daily  
517 Consumption of Stevia on Glucose Homeostasis, Body Weight, and Energy Intake: A  
518 Randomised Open-Label 12-Week Trial in Healthy Adults. *Nutrients.* 2020;12(10).



- 1  
2  
3 519 13. Magnuson BA, Carakostas MC, Moore NH, Poulos SP, Renwick AG. Biological fate  
4 520 of low-calorie sweeteners. *Nutr Rev.* 2016;74(11):670-89.
- 5 521 14. Swithers SE. Artificial sweeteners produce the counterintuitive effect of inducing  
6 522 metabolic derangements. *Trends Endocrinol Metab.* 2013;24(9):431-41.
- 7 523 15. McGlynn ND, Khan TA, Wang L, Zhang R, Chiavaroli L, Au-Yeung F, et al.  
8 524 Association of Low- and No-Calorie Sweetened Beverages as a Replacement for Sugar-  
9 525 Sweetened Beverages With Body Weight and Cardiometabolic Risk: A Systematic Review  
10 526 and Meta-analysis. *JAMA Network Open.* 2022;5(3):e222092-e.
- 11 527 16. Nunn R, Young L, Ni Mhurchu C. Prevalence and Types of Non-Nutritive  
12 528 Sweeteners in the New Zealand Food Supply, 2013 and 2019. *Nutrients.* 2021;13(9).
- 13 529 17. Ng SW, Colchero MA, White M. How should we evaluate sweetened beverage tax  
14 530 policies? A review of worldwide experience. *BMC Public Health.* 2021;21(1):1941.
- 15 531 18. Russell C, Grimes C, Baker P, Sievert K, Lawrence MA. The drivers, trends and  
16 532 dietary impacts of non-nutritive sweeteners in the food supply: a narrative review. *Nutrition*  
17 533 *Research Reviews.* 2021;34(2):185-208.
- 18 534 19. Webster J. Working paper on product reformulation and portion size. 2009. Brussels:  
19 535 EU Platform on diet, physical activity and health. 2016.
- 20 536 20. World Health Organisation. Sugar-sweetened beverage taxes in the WHO European  
21 537 Region: success through lessons learned and challenges faced. Copenhagen. WHO Regional  
22 538 Office for Europe Licence: CC BY-NC-SA 3.0 IGO; 2022. Contract No.:  
23 539 WHO/EURO:2022-4781-44544-6381.
- 24 540 21. Rogers PJ, Hogenkamp PS, de Graaf C, Higgs S, Lluch A, Ness AR, et al. Does low-  
25 541 energy sweetener consumption affect energy intake and body weight? A systematic review,  
26 542 including meta-analyses, of the evidence from human and animal studies. *International*  
27 543 *journal of obesity (2005).* 2016;40(3):381-94.
- 28 544 22. SPIRIT 2013 Statement: Defining Standard Protocol Items for Clinical Trials. *Annals*  
29 545 *of Internal Medicine.* 2013;158(3):200-7.
- 30 546 23. Almiron-Roig E, Green H, Virgili R, Aeschlimann JM, Moser M, Erkner A.  
31 547 Validation of a new hand-held electronic appetite rating system against the pen and paper  
32 548 method. *Appetite.* 2009;53(3):465-8.
- 33 549 24. Jones BK, M. G. Design and Analysis of Cross-Over Trials. 3rd Edition ed. Boca  
34 550 Raton, Florida: CRC Press; 2015.
- 35  
36  
37  
38  
39  
40  
41  
42  
43  
44  
45  
46  
47  
48  
49  
50  
51  
52  
53  
54  
55  
56  
57  
58  
59  
60

- 1  
2  
3 551 25. Blundell J, De Graaf C, Hulshof T, Jebb S, Livingstone B, Lluch A, et al. Appetite  
4 552 control: Methodological aspects of the evaluation of foods. *Obesity Reviews*.  
5 553 2010;11(3):251-70.  
6  
7  
8 554 26. Garner DM, Garfinkel PE. The Eating Attitudes Test: an index of the symptoms of  
9 555 anorexia nervosa. *Psychol Med*. 1979;9(2):273-9.  
10  
11 556 27. Masic U, Harrold JA, Christiansen P, Cuthbertson DJ, Hardman CA, Robinson E, et  
12 557 al. EffectS of non-nutritive sWeetened beverages on appetITe during aCtive weighT loss  
13 558 (SWITCH): Protocol for a randomized, controlled trial assessing the effects of non-nutritive  
14 559 sweetened beverages compared to water during a 12-week weight loss period and a follow up  
15 560 weight maintenance period. *Contemp Clin Trials*. 2017;53:80-8.  
16  
17 561 28. Booth M. Assessment of physical activity: an international perspective. *Res Q Exerc*  
18 562 *Sport*. 2000;71 Suppl 2:114-20.  
19  
20 563 29. Dalton M, Finlayson G, Hill A, Blundell J. Preliminary validation and principal  
21 564 components analysis of the Control of Eating Questionnaire (CoEQ) for the experience of  
22 565 food craving. *European Journal of Clinical Nutrition*. 2015;69(12):1313-7.  
23  
24 566 30. Brunger L, Smith A, Re R, Wickham M, Philippides A, Watten P, et al. Validation of  
25 567 an iPad visual analogue rating system for assessing appetite and satiety. *Appetite*.  
26 568 2015;84:259-63.  
27  
28 569 31. Gibbons C, Caudwell P, Finlayson G, King N, Blundell J. Validation of a new hand-  
29 570 held electronic data capture method for continuous monitoring of subjective appetite  
30 571 sensations. *Int J Behav Nutr Phys Act*. 2011;8:57.  
31  
32 572 32. Finlayson G, King N, Blundell J. The role of implicit wanting in relation to explicit  
33 573 liking and wanting for food: implications for appetite control. *Appetite*. 2008;50(1):120-7.  
34  
35 574 33. Forde CG, Almiron-Roig E, Brunstrom JM. Expected Satiety: Application to Weight  
36 575 Management and Understanding Energy Selection in Humans. *Current obesity reports*.  
37 576 2015;4(1):131-40.  
38  
39 577 34. Snoek HM, Huntjens L, Van Gemert LJ, De Graaf C, Weenen H. Sensory-specific  
40 578 satiety in obese and normal-weight women. *Am J Clin Nutr*. 2004;80(4):823-31.  
41  
42 579 35. Lasschuijt MP, Mars M, de Graaf C, Smeets PAM. Endocrine Cephalic Phase  
43 580 Responses to Food Cues: A Systematic Review. *Adv Nutr*. 2020;11(5):1364-83.  
44  
45 581 36. Anderson GH, Catherine NL, Woodend DM, Wolever TM. Inverse association  
46 582 between the effect of carbohydrates on blood glucose and subsequent short-term food intake  
47 583 in young men. *The American Journal of Clinical Nutrition*. 2002;76(5):1023-30.  
48  
49  
50  
51  
52  
53  
54  
55  
56  
57  
58  
59  
60



- 1  
2  
3 584 37. Steinfeldt L, Anand J, Murayi T. Food Reporting Patterns in the USDA Automated  
4 585 Multiple-Pass Method. *Procedia Food Science*. 2013;2:145-56.  
5  
6 586 38. Australian Bureau of Statistics. Australian Health Survey Food Model Booklet.  
7 587 Commonwealth of Australia. Canberra. 2010.  
8  
9 588 39. Zandstra EH, Mathey MF, Graaf C, van Staveren WA. Short-term regulation of food  
10 589 intake in children, young adults and the elderly. *Eur J Clin Nutr*. 2000;54(3):239-46.  
11  
12 590 40. Brunstrom JM, Shakeshaft NG, Scott-Samuel NE. Measuring 'expected satiety' in a  
13 591 range of common foods using a method of constant stimuli. *Appetite*. 2008;51(3):604-14.  
14  
15 592 41. O'Donnell LJ, Virjee J, Heaton KW. Detection of pseudodiarrhoea by simple clinical  
16 593 assessment of intestinal transit rate. *BMJ (Clinical research ed)*. 1990;300(6722):439-40.  
17  
18 594 42. Svedlund J, Sjödin I, Dotevall G. GSRS--a clinical rating scale for gastrointestinal  
19 595 symptoms in patients with irritable bowel syndrome and peptic ulcer disease. *Dig Dis Sci*.  
20 596 1988;33(2):129-34.  
21  
22 597 43. Wasserstein RL, Lazar NA. The ASA Statement on p-Values: Context, Process, and  
23 598 Purpose. *The American Statistician*. 2016;70(2):129-33.  
24  
25  
26  
27  
28  
29  
30  
31  
32  
33  
34  
35  
36  
37  
38  
39  
40  
41  
42  
43  
44  
45  
46  
47  
48  
49  
50  
51  
52  
53  
54  
55  
56  
57  
58  
59  
60



**Figure 1:** Latin Square design and duration for cross-over trials. Each trial will include two no added/reduced sugar reformulated products and 1 sucrose-sweetened control (double-blind) per food matrix. Participant will be randomised to 1 of 6 treatment orders. For example, a participant randomised to order one will consume product A in the lab on clinical investigation day (CID) 1/exposure day (ED) 1 and then every day at home until CID2/ED14 when it is consumed in the lab again. After a 2-week washout, the participant returns to the lab and repeats the study block with product B, followed by another 2-week washout, followed by the final study block with product C.

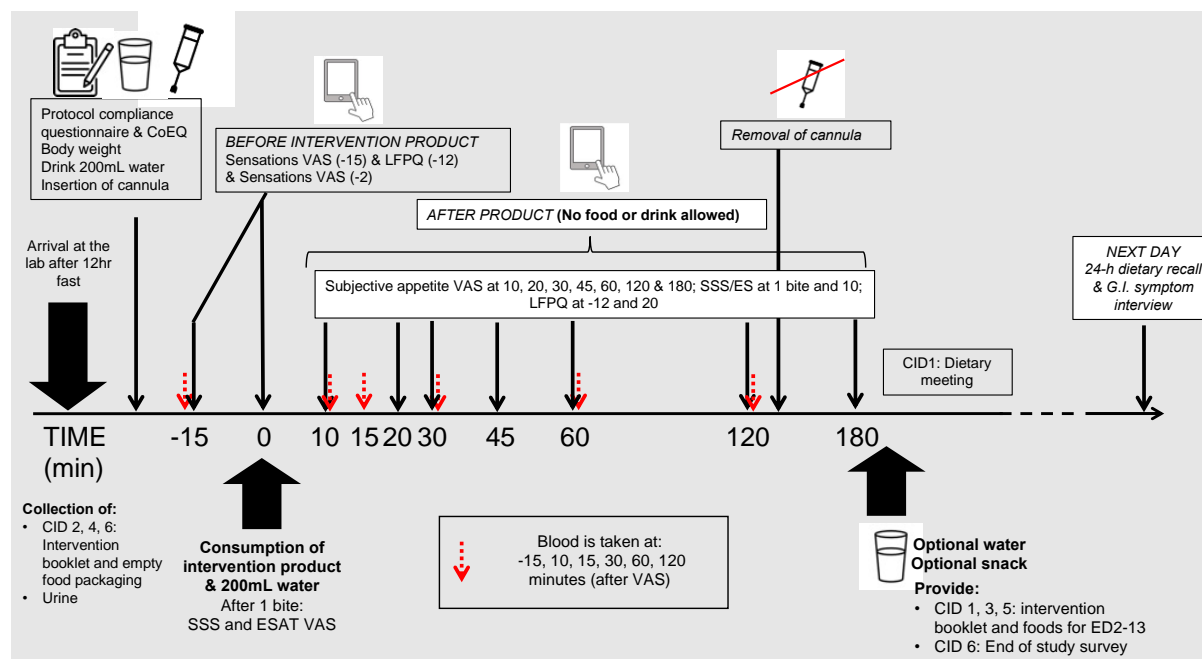

**Figure 2:** Example timeline of events during Clinical Investigation Day for biscuit matrix.

CoEQ, Control of Eating Questionnaire; ED, Exposure Day; ESAT, Expected Satiety; G.I., gastrointestinal; LFPQ, Leeds Food Preference Questionnaire; SSS, Sensory-Specific Satiety; VAS, Visual Analogue Scale.

## Supplemental Material 1: Exclusion Criteria

### General Criteria

- Blood donation < 3 month prior to study or for full duration of the study.
- Food allergy, intolerance, restriction or avoidance of any of the study foods (e.g., veganism) or history of anaphylactic reaction to any food.
- Likelihood for disordered eating defined as a score  $\geq 20$  on the EAT-26 test
- Currently dieting to lose weight.
- Having lost or gained >4.5 kg in the last 3 months.
- Smoking or having quit <3 months prior to study.
- Habitually consuming >14 units/week of alcohol in women or >21 units/week in men in the last 3 months.
- Performing >10 h of intense physical activity per week in the last 3 months.
- Night or late shift work (ending later than 11 pm on a permanent basis). Rotational shift work allowed if can attend on days that do not follow a late/night shift.
- Self-reported use of drugs of abuse within the previous 12 months.
- For women: Pregnancy, lactation.
- Persons who do not have access to either (mobile) phone or internet (this is necessary when being contacted by the study personnel during the study).
- Insufficient communication in the national language.
- Proven or suspected inability, physically or mentally, to comply with the procedures required by the study protocol as evaluated by the daily study manager, site-PI, PI or clinical responsible. This includes volunteers for which insufficient collaboration may be foreseen.
- Subject's general condition contraindicates continuing in the study as evaluated by the daily study manager, site-PI, PI or responsible clinician.
- Simultaneous participation in other relevant clinical intervention studies.
- Previous university or college training related to eating behaviour research.

### Medical conditions as known by the person

- Self-reported eating disorders.
- Diagnosed anaemia.
- Diagnosed diabetes mellitus.
- Abnormal G.I. function or structure such as malformation, angiodysplasia, active peptic ulcer.
- Active inflammatory bowel disease, celiac disease, chronic pancreatitis, or other disorder potentially causing malabsorption.
- History of G.I. surgery with permanent effect (i.e., surgical treatment of obesity).
- Medical history of CVD (e.g., current angina; myocardial infarction or stroke within the past 6 months; heart failure; symptomatic peripheral vascular disease).
- Significant liver disease, e.g., cirrhosis (fatty liver disease allowed).
- Malignancy which is currently active or in remission for less than five years after last treatment (local basal and squamous cell skin cancer allowed).
- Thyroid diseases, except those on Levothyroxine treatment of hypothyroidism if the person has been on a stable dose for at least 3 months.
- Psychiatric illness (e.g., major depression, bipolar disorders).

### Medication

- 1  
2  
3 • Use currently or within the previous 3 months of prescription or over the counter  
4 medication that has the potential of affecting appetite, satiety, or body weight incl. food  
5 supplements.

6 Except: low dose antidepressants if they, in the judgement of the daily study manager, site-  
7 PI, PI or clinical responsible, do not affect weight or following the study protocol.  
8 Levothyroxine for treatment of hypothyroidism is allowed if the person has been on a stable  
9 dose for at least 3 months.

- 10 • Cholesterol lowering medication, if the dose has changed during the last 3 months (i.e.,  
11 the medication is allowed if the participant has been on a stable dose for at least 3 months).  
12  
13  
14  
15  
16  
17  
18  
19  
20  
21  
22  
23  
24  
25  
26  
27  
28  
29  
30  
31  
32  
33  
34  
35  
36  
37  
38  
39  
40  
41  
42  
43  
44  
45  
46  
47  
48  
49  
50  
51  
52  
53  
54  
55  
56  
57  
58  
59  
60

For peer review only

## Supplemental Material 2: Product Ingredients List

Table 1: Proposed energy and nutrient composition of the intervention products

|                                    | Control  |                                                              | Reformulation |                                                              |
|------------------------------------|----------|--------------------------------------------------------------|---------------|--------------------------------------------------------------|
|                                    | Per 100g | Per portion<br>(85g/ 3 cakes)                                | Per 100g      | Per portion<br>(85g/ 3 cakes)                                |
| <b>Cake with fruit filling</b>     |          |                                                              |               |                                                              |
| Energy (kcal)                      | 391      | 332                                                          | 343           | 292                                                          |
| Energy (kJ)                        | 1638     | 1392                                                         | 1427          | 1213                                                         |
| Fats (g)                           | 16.6     | 14.1                                                         | 16.5          | 14.0                                                         |
| Sat. fats (g)                      | 1.7      | 1.4                                                          | 1.7           | 1.4                                                          |
| Carbs (g)                          | 56.8     | 48.2                                                         | 57.0          | 48.4                                                         |
| Sugars (g)                         | 28.3     | 24.1                                                         | 1.3           | 1.1                                                          |
| Polyols (g)                        | 3.7      | 3.1                                                          | 28.4          | 24.1                                                         |
| Fibre (g)                          | 1.4      | 1.2                                                          | 1.3           | 1.1                                                          |
| Proteins (g)                       | 5.7      | 4.8                                                          | 5.7           | 4.8                                                          |
| Salt (mg)                          | 0.4      | 0.3                                                          | 0.4           | 0.3                                                          |
| <b>Biscuit</b>                     | Per 100g | Per portion<br>(3 biscuits)                                  | Per 100g      | Per portion<br>(3 biscuits)                                  |
| Energy (kcal)                      | 423      | 360                                                          | 384           | 326                                                          |
| Energy (kJ)                        | 1783     | 1516                                                         | 1609          | 1368                                                         |
| Fats (g)                           | 11.2     | 9.5                                                          | 11.5          | 9.8                                                          |
| Sat. fats (g)                      | 7.11     | 6.0                                                          | 7.33          | 6.2                                                          |
| Carbs (g)                          | 75.9     | 64.5                                                         | 76.2          | 64.8                                                         |
| Sugars (g)                         | 24.7     | 21.0                                                         | 1.8           | 1.5                                                          |
| Polyols (g)                        | 3.7      | 3.1                                                          | 22.7          | 19.3                                                         |
| Fibre (g)                          | 0.7      | 0.6                                                          | 2.4           | 2.0                                                          |
| Proteins (g)                       | 6.5      | 5.5                                                          | 6.6           | 5.6                                                          |
| Salt (mg)                          | 0.7      | 0.6                                                          | 0.7           | 0.6                                                          |
| <b>Creamy yoghurt</b>              | Per 100g | Per portion<br>(135g 1 serving)                              | Per 100g      | Per portion<br>(135g 1 serving)                              |
| Energy (kcal)                      | 226      | 305                                                          | 180           | 242                                                          |
| Energy (kJ)                        | 943      | 1286                                                         | 750           | 1013                                                         |
| Fats (g)                           | 18.5     | 25.0                                                         | 16.3          | 22.0                                                         |
| Sat. fats (g)                      | 8.3      | 18.7                                                         | 8.3           | 18.7                                                         |
| Carbs (g)                          | 8.12     | 10.96                                                        | 1.71          | 2.31                                                         |
| Sugars (g)                         | 8.12     | 10.96                                                        | 1.71          | 2.31                                                         |
| Polyols (g)                        | 0.00     | 0.00                                                         | 0.00          | 0.00                                                         |
| Fibre (g)                          | 0.00     | 0.00                                                         | 0.00          | 0.00                                                         |
| Proteins (g)                       | 6.50     | 8.78                                                         | 6.50          | 8.78                                                         |
| Salt (mg)                          | 0.14     | 0.32                                                         | 0.14          | 0.32                                                         |
| <b>Chocolate</b>                   | Per 100g | Per portion<br>(60g 1 bar)                                   | Per 100g      | Per portion<br>(60g 1 bar)                                   |
| Energy (kcal)                      | 500      | 325                                                          | 477           | 310                                                          |
| Energy (kJ)                        | 2098     | 1364                                                         | 2004          | 1303                                                         |
| Fats (g)                           | 31       | 20                                                           | 31            | 20                                                           |
| Sat. fats (g)                      | 18       | 12                                                           | 18            | 12                                                           |
| Carbs (g)                          | 46       | 30                                                           | 46            | 30                                                           |
| Sugars (g)                         | 45       | 29                                                           | 31            | 20                                                           |
| Polyols (g)                        | 0        | 0                                                            | 12            | 8                                                            |
| Fibre (g)                          | 8        | 5                                                            | 8             | 5                                                            |
| Proteins (g)                       | 5        | 3                                                            | 5             | 3                                                            |
| Salt (mg)                          | 5        | 3                                                            | 8             | 5                                                            |
| <b>Honey ball breakfast cereal</b> | Per 100g | Per portion<br>(60 g of cereals + 125 ml<br>(121 g) of milk) | Per 100g      | Per portion<br>(60 g of cereals + 125 ml<br>(121 g) of milk) |
| Energy (kcal)                      | 173      | 320                                                          | 153           | 283                                                          |
| Energy (kJ)                        | 731.2    | 1353.8                                                       | 641.7         | 1187.2                                                       |
| Fats (g)                           | 3.26     | 6.03                                                         | 3.16          | 5.84                                                         |
| Sat. fats (g)                      | 1.64     | 3.04                                                         | 1.63          | 3.01                                                         |
| Carbs (g)                          | 31.17    | 57.66                                                        | 25.59         | 47.33                                                        |

1  
2  
3  
4  
5  
6  
7  
8  
9  
10  
11  
12  
13  
14  
15  
16  
17  
18  
19  
20  
21  
22  
23  
24  
25  
26  
27  
28  
29  
30  
31  
32  
33  
34  
35  
36  
37  
38  
39  
40  
41  
42  
43  
44  
45  
46  
47  
48  
49  
50  
51  
52  
53  
54  
55  
56  
57  
58  
59  
60

|              |       |       |      |       |
|--------------|-------|-------|------|-------|
| Sugars (g)   | 12.03 | 22.26 | 5.02 | 9.28  |
| Polyols (g)  | 0     | 0     | 4.86 | 9.00  |
| Fibre (g)    | 0.86  | 1.60  | 6.64 | 12.28 |
| Proteins (g) | 4.38  | 8.11  | 4.21 | 7.79  |
| Salt (mg)    | 0.35  | 0.64  | 0.33 | 0.60  |

For peer review only

### Supplementary Material 3 – Energy Intake Calculation

Percent energy compensation (%EC) was derived from the dietary recall data as previously reported by Zandstra et al.<sup>1</sup>, and Almiron-Roig et al<sup>2</sup>. Briefly, %EC was calculated as:

$$\%EC = [ (EI_{\text{Control Product}} - EI_{\text{Reformulated Product}}) / |EP| ] * 100$$

where EI represents the cumulative energy intake 24-h post consumption under the control product or under the reformulated product conditions, excluding the energy of the product itself. EP (as an absolute value) represents the difference in energy between the full-energy-containing preload (i.e., control product) and the lower-energy-containing preload (i.e., reformulated products). For example, if the control product has a value of 325 kcal and the reformulated product has a value of 250 kcal, then EP=325-250 or 75 kcal).

1. Zandstra, E. H., Mathey, M. F., Graaf, C., & van Staveren, W. A. (2000). Short-term regulation of food intake in children, young adults and the elderly. *European Journal of Clinical Nutrition*, 54(3), 239-246. <http://www.ncbi.nlm.nih.gov/pubmed/10713747>
2. Almiron-Roig, E., Palla, L., Guest, K., Ricchiutu, C., Vint, N., Jebb, S. A., & Drewnowski, A. (2013). Factors that determine energy compensation: a systematic review of preload studies. *Nutrition Reviews*, 71(7), 458-473. [https://doi.org/10.1111.nure.12048](https://doi.org/10.1111/nure.12048)



1  
2  
3 **Supplemental Material 4: Questions used to assess product taste text, subjective**  
4 **appetite sensations, sensory specific satiety and expected satiety**  
5  
6  
7

8 **Food Taste Test (FTT) (Conducted at screening)**  
9

10  
11 **Screen 1**  
12

13 You will now be presented with a food that we will ask you to evaluate. Please follow the  
14 instructions as they appear on the screen.  
15  
16  
17  
18  
19  
20

21 -----  
22 **Screen 2**  
23

- 24  
25 1. Take a mouthful of the food provided.  
26 2. Chew while counting to 5.  
27 3. Swallow.  
28 4. Answer the question by moving the arrow to the left or to the right.  
29  
30

31 **How pleasant was this food?**  
32  
33 Not at all pleasant Extremely  
34 pleasant  
35  
36  
37  
38  
39

40 -----  
41 **Screen 3**  
42

43 Thank you. This is the end of the taste test.  
44

45 Please call the investigator after submitting your answer.  
46  
47  
48  
49  
50  
51  
52  
53  
54  
55  
56  
57  
58  
59  
60

### **Subjective Appetite Questions (used during all CIDs)**

Considering how you feel **right now**, give your answer to each of the following questions by moving the arrow to the left or to the right at the point that best represents your experience. The list below is the complete list of questions used via visual analogue scales.

1. How **hungry** do you feel?
  2. How **full** do you feel?
  3. How **thirsty** do you feel?
  4. How strong is your **desire to eat**?
  5. How **much** do you think you could **eat** right now?
  6. How **nauseous** do you feel?
  7. How **bloated** do you feel?
  8. How strong is your appetite for something **savoury**?
  9. How strong is your appetite for something **sweet**?
- 

### **Sensory Specific Satiety Questionnaire** (assessed after 1 bite and after consumption of product)

#### **After 1 bite:**

Please take a bite of the food and keep the food in your mouth while rating the food. Swallow the food only when your rating is complete.

How **pleasant** is the taste of the food right now?

#### **At 10 minutes:**

How **pleasant** is the taste of the food now that you have finished eating it?

### **Expected Satiety (ESAT)** (assessed after 1 bite and after consumption of product)<sup>1</sup>

#### **After 1 bite:**

After having taken 1 bite of the food and looking at the whole food portion, how much will this portion of food stop you from feeling hungry between meals?

#### **At 10 minutes after full consumption and after SSS rating:**

How much will this food stop you from feeling hungry between meals?

## Supplemental Material 5: Fatty liver index and triglyceride glucose index calculation

### Calculation of Fatty Liver Index:

Some of the blood parameters will be used to calculate a Fatty Liver index (FLI) using the formula of Bedogni et al <sup>1</sup>, with measured values for BMI, fasting TG (mg/dL), fasting GGT (U/L) and waist circumference (cm), as follows:

$$FLI = \left( e^{0.953 \cdot \log_e(\text{triglycerides}) + 0.139 \cdot \text{BMI} + 0.718 \cdot \log_e(\text{ggt}) + 0.053 \cdot \text{waist circumference} - 15.745} \right) / \left( 1 + e^{0.953 \cdot \log_e(\text{triglycerides}) + 0.139 \cdot \text{BMI} + 0.718 \cdot \log_e(\text{ggt}) + 0.053 \cdot \text{waist circumference} - 15.745} \right) * 100$$

### Calculation of Triglyceride Glucose Index:

The formula of Simental-Mendía et al.<sup>2</sup> will be measured with measured fasting TG (mg/dL) and fasting glucose (mg/dL), by dividing the Ln of the TG \*glucose product by 2:

$$\text{TyG index} = \text{Ln} [(\text{fasting triglycerides}) (\text{mg/dL}) \times \text{fasting glucose} (\text{mg/dL})] / 2$$

1. Bedogni, G., Bellentani, S., Miglioli, L., Masutti, F., Passalacqua, M., Castiglione, A., & Tiribelli, C. (2006). The fatty liver index: A simple and accurate predictor of hepatic steatosis in the general population. *BMC Gastroenterology*, 6(1), 33. <https://doi.org/10.1186/1471-230X-6-33>
2. Simental-Mendía, L. E., Rodríguez-Morán, M., & Guerrero-Romero, F. (2008). The product of fasting glucose and triglycerides as surrogate for identifying insulin resistance in apparently healthy subjects. *Metabolic Syndrome and Related Disorders*, 6(4), 299–304. <https://doi.org/10.1089/met.2008.0034>

**Protocol for acute and repeated dose impact of sweeteners and sweetness enhancers on appetite-related behaviour, physiology, and health: a multi-centre, double-blind, cross-over, randomised, controlled trial in people with overweight/obesity. The SWEET project.**

**Supplemental Material 6: Trial Registration Data Set**

| Trial registration data                       |                                                                                                                                                                                                                                                                                                                                                                                                                                                                                                                                                                                                                                                                                                                                                                                                                                                                                                                                                                                                                                                                                                                                                                                                                                                                                                                                                                                                                                                                                                                                                                                                                                                                                                                                                                                                                                                                                                                                                                                                                                                                                                                                                                                                                                                                                                                                                                                                                                                                                                                                                                                                                                                                                                                                                                                                                                                                                                                                                                                                                                                                                                                                                                                                                                                                                                                                                                                                                                                                                                                                                                                                                                                                                                                                                                                                                                                                                                                                                                                                                                                                                                                                                                                                                                                                                                                              |
|-----------------------------------------------|------------------------------------------------------------------------------------------------------------------------------------------------------------------------------------------------------------------------------------------------------------------------------------------------------------------------------------------------------------------------------------------------------------------------------------------------------------------------------------------------------------------------------------------------------------------------------------------------------------------------------------------------------------------------------------------------------------------------------------------------------------------------------------------------------------------------------------------------------------------------------------------------------------------------------------------------------------------------------------------------------------------------------------------------------------------------------------------------------------------------------------------------------------------------------------------------------------------------------------------------------------------------------------------------------------------------------------------------------------------------------------------------------------------------------------------------------------------------------------------------------------------------------------------------------------------------------------------------------------------------------------------------------------------------------------------------------------------------------------------------------------------------------------------------------------------------------------------------------------------------------------------------------------------------------------------------------------------------------------------------------------------------------------------------------------------------------------------------------------------------------------------------------------------------------------------------------------------------------------------------------------------------------------------------------------------------------------------------------------------------------------------------------------------------------------------------------------------------------------------------------------------------------------------------------------------------------------------------------------------------------------------------------------------------------------------------------------------------------------------------------------------------------------------------------------------------------------------------------------------------------------------------------------------------------------------------------------------------------------------------------------------------------------------------------------------------------------------------------------------------------------------------------------------------------------------------------------------------------------------------------------------------------------------------------------------------------------------------------------------------------------------------------------------------------------------------------------------------------------------------------------------------------------------------------------------------------------------------------------------------------------------------------------------------------------------------------------------------------------------------------------------------------------------------------------------------------------------------------------------------------------------------------------------------------------------------------------------------------------------------------------------------------------------------------------------------------------------------------------------------------------------------------------------------------------------------------------------------------------------------------------------------------------------------------------------------------|
| Data category                                 | Information                                                                                                                                                                                                                                                                                                                                                                                                                                                                                                                                                                                                                                                                                                                                                                                                                                                                                                                                                                                                                                                                                                                                                                                                                                                                                                                                                                                                                                                                                                                                                                                                                                                                                                                                                                                                                                                                                                                                                                                                                                                                                                                                                                                                                                                                                                                                                                                                                                                                                                                                                                                                                                                                                                                                                                                                                                                                                                                                                                                                                                                                                                                                                                                                                                                                                                                                                                                                                                                                                                                                                                                                                                                                                                                                                                                                                                                                                                                                                                                                                                                                                                                                                                                                                                                                                                                  |
| Primary registry and trial identifying number | ClinicalTrials.gov NCT04633681                                                                                                                                                                                                                                                                                                                                                                                                                                                                                                                                                                                                                                                                                                                                                                                                                                                                                                                                                                                                                                                                                                                                                                                                                                                                                                                                                                                                                                                                                                                                                                                                                                                                                                                                                                                                                                                                                                                                                                                                                                                                                                                                                                                                                                                                                                                                                                                                                                                                                                                                                                                                                                                                                                                                                                                                                                                                                                                                                                                                                                                                                                                                                                                                                                                                                                                                                                                                                                                                                                                                                                                                                                                                                                                                                                                                                                                                                                                                                                                                                                                                                                                                                                                                                                                                                               |
| Date of registration in primary registry      | November 2021                                                                                                                                                                                                                                                                                                                                                                                                                                                                                                                                                                                                                                                                                                                                                                                                                                                                                                                                                                                                                                                                                                                                                                                                                                                                                                                                                                                                                                                                                                                                                                                                                                                                                                                                                                                                                                                                                                                                                                                                                                                                                                                                                                                                                                                                                                                                                                                                                                                                                                                                                                                                                                                                                                                                                                                                                                                                                                                                                                                                                                                                                                                                                                                                                                                                                                                                                                                                                                                                                                                                                                                                                                                                                                                                                                                                                                                                                                                                                                                                                                                                                                                                                                                                                                                                                                                |
| Secondary identifying numbers                 | N/A                                                                                                                                                                                                                                                                                                                                                                                                                                                                                                                                                                                                                                                                                                                                                                                                                                                                                                                                                                                                                                                                                                                                                                                                                                                                                                                                                                                                                                                                                                                                                                                                                                                                                                                                                                                                                                                                                                                                                                                                                                                                                                                                                                                                                                                                                                                                                                                                                                                                                                                                                                                                                                                                                                                                                                                                                                                                                                                                                                                                                                                                                                                                                                                                                                                                                                                                                                                                                                                                                                                                                                                                                                                                                                                                                                                                                                                                                                                                                                                                                                                                                                                                                                                                                                                                                                                          |
| Source(s) of monetary or material support     | European Union Horizon 2020 Program                                                                                                                                                                                                                                                                                                                                                                                                                                                                                                                                                                                                                                                                                                                                                                                                                                                                                                                                                                                                                                                                                                                                                                                                                                                                                                                                                                                                                                                                                                                                                                                                                                                                                                                                                                                                                                                                                                                                                                                                                                                                                                                                                                                                                                                                                                                                                                                                                                                                                                                                                                                                                                                                                                                                                                                                                                                                                                                                                                                                                                                                                                                                                                                                                                                                                                                                                                                                                                                                                                                                                                                                                                                                                                                                                                                                                                                                                                                                                                                                                                                                                                                                                                                                                                                                                          |
| Primary sponsor                               | European Union Horizon 2020 Program                                                                                                                                                                                                                                                                                                                                                                                                                                                                                                                                                                                                                                                                                                                                                                                                                                                                                                                                                                                                                                                                                                                                                                                                                                                                                                                                                                                                                                                                                                                                                                                                                                                                                                                                                                                                                                                                                                                                                                                                                                                                                                                                                                                                                                                                                                                                                                                                                                                                                                                                                                                                                                                                                                                                                                                                                                                                                                                                                                                                                                                                                                                                                                                                                                                                                                                                                                                                                                                                                                                                                                                                                                                                                                                                                                                                                                                                                                                                                                                                                                                                                                                                                                                                                                                                                          |
| Secondary sponsor(s)                          | N/A                                                                                                                                                                                                                                                                                                                                                                                                                                                                                                                                                                                                                                                                                                                                                                                                                                                                                                                                                                                                                                                                                                                                                                                                                                                                                                                                                                                                                                                                                                                                                                                                                                                                                                                                                                                                                                                                                                                                                                                                                                                                                                                                                                                                                                                                                                                                                                                                                                                                                                                                                                                                                                                                                                                                                                                                                                                                                                                                                                                                                                                                                                                                                                                                                                                                                                                                                                                                                                                                                                                                                                                                                                                                                                                                                                                                                                                                                                                                                                                                                                                                                                                                                                                                                                                                                                                          |
| Contact for public queries                    | Professor Graham Finlayson (G.S.Finlayson@leeds.ac.uk)                                                                                                                                                                                                                                                                                                                                                                                                                                                                                                                                                                                                                                                                                                                                                                                                                                                                                                                                                                                                                                                                                                                                                                                                                                                                                                                                                                                                                                                                                                                                                                                                                                                                                                                                                                                                                                                                                                                                                                                                                                                                                                                                                                                                                                                                                                                                                                                                                                                                                                                                                                                                                                                                                                                                                                                                                                                                                                                                                                                                                                                                                                                                                                                                                                                                                                                                                                                                                                                                                                                                                                                                                                                                                                                                                                                                                                                                                                                                                                                                                                                                                                                                                                                                                                                                       |
| Contact for scientific queries                | Professor Graham Finlayson (G.S.Finlayson@leeds.ac.uk)                                                                                                                                                                                                                                                                                                                                                                                                                                                                                                                                                                                                                                                                                                                                                                                                                                                                                                                                                                                                                                                                                                                                                                                                                                                                                                                                                                                                                                                                                                                                                                                                                                                                                                                                                                                                                                                                                                                                                                                                                                                                                                                                                                                                                                                                                                                                                                                                                                                                                                                                                                                                                                                                                                                                                                                                                                                                                                                                                                                                                                                                                                                                                                                                                                                                                                                                                                                                                                                                                                                                                                                                                                                                                                                                                                                                                                                                                                                                                                                                                                                                                                                                                                                                                                                                       |
| Public title                                  | Impact of Sweeteners on Behaviour, Physiology & Health ( SWEET-WP2-P2 )                                                                                                                                                                                                                                                                                                                                                                                                                                                                                                                                                                                                                                                                                                                                                                                                                                                                                                                                                                                                                                                                                                                                                                                                                                                                                                                                                                                                                                                                                                                                                                                                                                                                                                                                                                                                                                                                                                                                                                                                                                                                                                                                                                                                                                                                                                                                                                                                                                                                                                                                                                                                                                                                                                                                                                                                                                                                                                                                                                                                                                                                                                                                                                                                                                                                                                                                                                                                                                                                                                                                                                                                                                                                                                                                                                                                                                                                                                                                                                                                                                                                                                                                                                                                                                                      |
| Scientific title                              | Acute and Repeated Impact of Sweeteners and Sweetness Enhancers on Food Behaviour, Physiology & Health (SWEET Work Package 2 Phase 2)                                                                                                                                                                                                                                                                                                                                                                                                                                                                                                                                                                                                                                                                                                                                                                                                                                                                                                                                                                                                                                                                                                                                                                                                                                                                                                                                                                                                                                                                                                                                                                                                                                                                                                                                                                                                                                                                                                                                                                                                                                                                                                                                                                                                                                                                                                                                                                                                                                                                                                                                                                                                                                                                                                                                                                                                                                                                                                                                                                                                                                                                                                                                                                                                                                                                                                                                                                                                                                                                                                                                                                                                                                                                                                                                                                                                                                                                                                                                                                                                                                                                                                                                                                                        |
| Countries of recruitment                      | Denmark, France, Spain, United Kingdom                                                                                                                                                                                                                                                                                                                                                                                                                                                                                                                                                                                                                                                                                                                                                                                                                                                                                                                                                                                                                                                                                                                                                                                                                                                                                                                                                                                                                                                                                                                                                                                                                                                                                                                                                                                                                                                                                                                                                                                                                                                                                                                                                                                                                                                                                                                                                                                                                                                                                                                                                                                                                                                                                                                                                                                                                                                                                                                                                                                                                                                                                                                                                                                                                                                                                                                                                                                                                                                                                                                                                                                                                                                                                                                                                                                                                                                                                                                                                                                                                                                                                                                                                                                                                                                                                       |
| Health condition(s) or problem(s) studied     | Eating Behaviour                                                                                                                                                                                                                                                                                                                                                                                                                                                                                                                                                                                                                                                                                                                                                                                                                                                                                                                                                                                                                                                                                                                                                                                                                                                                                                                                                                                                                                                                                                                                                                                                                                                                                                                                                                                                                                                                                                                                                                                                                                                                                                                                                                                                                                                                                                                                                                                                                                                                                                                                                                                                                                                                                                                                                                                                                                                                                                                                                                                                                                                                                                                                                                                                                                                                                                                                                                                                                                                                                                                                                                                                                                                                                                                                                                                                                                                                                                                                                                                                                                                                                                                                                                                                                                                                                                             |
| Intervention(s)                               | Consumption of food product with sweetener and sweetness enhancer<br>Consumption of sucrose-sweetened control food product                                                                                                                                                                                                                                                                                                                                                                                                                                                                                                                                                                                                                                                                                                                                                                                                                                                                                                                                                                                                                                                                                                                                                                                                                                                                                                                                                                                                                                                                                                                                                                                                                                                                                                                                                                                                                                                                                                                                                                                                                                                                                                                                                                                                                                                                                                                                                                                                                                                                                                                                                                                                                                                                                                                                                                                                                                                                                                                                                                                                                                                                                                                                                                                                                                                                                                                                                                                                                                                                                                                                                                                                                                                                                                                                                                                                                                                                                                                                                                                                                                                                                                                                                                                                   |
| Key inclusion and exclusion criteria          | Ages eligible for study: $\geq 18 \leq 60$ years ; Sexes eligible for study :both; Accepts healthy volunteers: yes                                                                                                                                                                                                                                                                                                                                                                                                                                                                                                                                                                                                                                                                                                                                                                                                                                                                                                                                                                                                                                                                                                                                                                                                                                                                                                                                                                                                                                                                                                                                                                                                                                                                                                                                                                                                                                                                                                                                                                                                                                                                                                                                                                                                                                                                                                                                                                                                                                                                                                                                                                                                                                                                                                                                                                                                                                                                                                                                                                                                                                                                                                                                                                                                                                                                                                                                                                                                                                                                                                                                                                                                                                                                                                                                                                                                                                                                                                                                                                                                                                                                                                                                                                                                           |
|                                               | <p>Inclusion criteria: BMI 25-35kgm<sup>2</sup>; Use of contraceptive methods or not planning to become pregnant for the duration of the study (women only); Regular consumption of sugar-containing foods and willing to consume sugar and artificially-sweetened food products; Liking of the intervention foods defined by a response of 'Yes' for the product during the pre-screening interview and a score of 40% or above on the Liking Visual Analogue Scale for the sucrose-sweetened control product; Able to participate on the Clinical Investigation Days during normal working hours; Healthy as determined from the self-reported medical history or when a clinical condition exists, when this is considered to be irrelevant (i.e. not influencing study outcomes) for the study by the study medical doctor; Consuming breakfast regularly (at least 5 days per week); Able to understand and be willing to sign the informed consent form, and to follow all the study procedures and requirements; Capacity to store at-home intervention quantity of intervention product</p> <p>Exclusion criteria: Blood donation &lt; 3 month prior to study or for full duration of the study; Food allergy, intolerance, restriction or avoidance of any of the study foods (e.g. veganism) or history of anaphylactic reaction to any food; Likelihood for disordered eating defined as a score <math>\geq 20</math> on the Eating Attitudes Test; Currently dieting to lose weight; Having lost or gained &gt;4.5 kg in the last 3 months; Smoking or having quit &lt;3 months prior to study; Habitually consuming &gt;14 units/week of alcohol in women or &gt;21 units/week in men in the last 3 months; Performing &gt;10 h of intense physical activity per week in the last 3 months; Night or late shift work (ending later than 11 pm on a permanent basis). Rotational shift work allowed if can attend on days that do not follow a late/night shift; Self-reported use of drugs of abuse within the previous 12 months; Pregnancy, lactation (women only); Persons who do not have access to either (mobile) phone or internet (this is necessary when being contacted by the study personnel during the study); Insufficient communication in the national language; Proven or suspected inability, physically or mentally, to comply with the procedures required by the study protocol as evaluated by the daily study manager, site-PI, PI or clinical responsible. This includes volunteers for which insufficient collaboration may be foreseen; Subject's general condition contraindicates continuing in the study as evaluated by the daily study manager, site-PI, PI or responsible clinician; Simultaneous participation in other relevant clinical intervention studies; Previous university or college training related to eating behaviour research; Self-reported eating disorders; Diagnosed anaemia; Diagnosed diabetes mellitus; Abnormal G.I. function or structure such as malformation, angiodysplasia, active peptic ulcer; Active inflammatory bowel disease, coeliac disease, chronic pancreatitis or other disorder potentially causing malabsorption; History of G.I. surgery with permanent effect (i.e. surgical treatment of obesity); Medical history of Cardiovascular Disease (e.g. current angina; myocardial infarction or stroke within the past 6 months; heart failure; symptomatic peripheral vascular disease); Significant liver disease, e.g. cirrhosis (fatty liver disease allowed); Malignancy which is currently active or in remission for less than five years after last treatment (local basal and squamous cell skin cancer allowed); Thyroid diseases, except those on Levothyroxine treatment of hypothyroidism if the person has been on a stable dose for at least 3months; Psychiatric illness (e.g. major depression, bipolar disorders); Use currently or within the previous 3 months of prescription or over the counter medication that has the potential of affecting appetite, satiety or body weight incl. food supplements. Except: low dose antidepressants if they, in the judgement of the daily study manager, site-PI, PI or clinical responsible, do not affect weight or following the study protocol. Levothyroxine for</p> |

|    |                                                                                                                                       |
|----|---------------------------------------------------------------------------------------------------------------------------------------|
| 1  |                                                                                                                                       |
| 2  |                                                                                                                                       |
| 3  | treatment of hypothyroidism is allowed if the person has been on a stable dose for at least 3 months. Cholesterol lowering            |
| 4  | medication, if the dose has changed during the last 3 months (i.e., the medication is allowed if the participant has been on a stable |
| 5  | dose for at least 3 months)                                                                                                           |
| 6  | Interventional                                                                                                                        |
| 7  | Allocation: Randomised. Double-blind, within-subjects, cross-over trial                                                               |
| 8  |                                                                                                                                       |
| 9  | Study type                                                                                                                            |
| 10 | Primary purpose: Evaluation                                                                                                           |
| 11 | Phase: N/A                                                                                                                            |
| 12 | Date of first enrolment                                                                                                               |
| 13 | April 2021                                                                                                                            |
| 14 | Target sample size                                                                                                                    |
| 15 | 213                                                                                                                                   |
| 16 | Recruitment status                                                                                                                    |
| 17 | Recruiting                                                                                                                            |
| 18 | Primary outcome(s)                                                                                                                    |
| 19 | Incremental area under the curve (iAUC) for composite appetite sensations in response to each product.                                |
| 20 | Leeds Food Preference Questionnaire (LFPQ) Explicit Liking, Implicit Wanting, Relative preference, Explicit wanting; Control of       |
| 21 | Eating Questionnaire (CoEQ): Craving Control, Craving for Sweet, Craving for Savoury, Positive Mood; Blood Glucose                    |
| 22 | Incremental Area Under the Curve; Blood Insulin Incremental Area Under the Curve; Cephalic and intestinal satiety biomarkers:         |
| 23 | Glucagon-like peptide-1 (GLP-1) Incremental area under the curve for blood GLP-1 concentrations in response to each product           |
| 24 | (120 min post intake); Ghrelin Incremental area under the curve for blood Ghrelin concentrations in response to each product          |
| 25 | (120 min post intake).                                                                                                                |
| 26 |                                                                                                                                       |
| 27 |                                                                                                                                       |
| 28 |                                                                                                                                       |
| 29 |                                                                                                                                       |
| 30 |                                                                                                                                       |
| 31 |                                                                                                                                       |
| 32 |                                                                                                                                       |
| 33 |                                                                                                                                       |
| 34 |                                                                                                                                       |
| 35 |                                                                                                                                       |
| 36 |                                                                                                                                       |
| 37 |                                                                                                                                       |
| 38 |                                                                                                                                       |
| 39 |                                                                                                                                       |
| 40 |                                                                                                                                       |
| 41 |                                                                                                                                       |
| 42 |                                                                                                                                       |
| 43 |                                                                                                                                       |
| 44 |                                                                                                                                       |
| 45 |                                                                                                                                       |
| 46 |                                                                                                                                       |
| 47 |                                                                                                                                       |
| 48 |                                                                                                                                       |
| 49 |                                                                                                                                       |
| 50 |                                                                                                                                       |
| 51 |                                                                                                                                       |
| 52 |                                                                                                                                       |
| 53 |                                                                                                                                       |
| 54 |                                                                                                                                       |
| 55 |                                                                                                                                       |
| 56 |                                                                                                                                       |
| 57 |                                                                                                                                       |
| 58 |                                                                                                                                       |
| 59 |                                                                                                                                       |
| 60 |                                                                                                                                       |

Appendices: Informed Consent Materials and GDPR

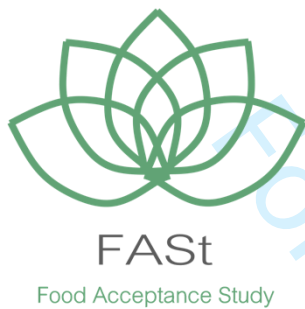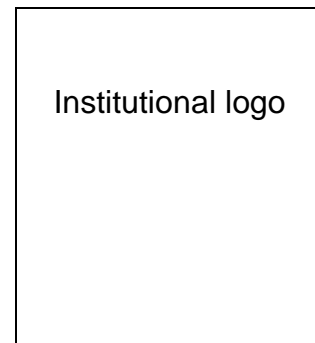

**Informed Consent Form**

Title of research project: Food Acceptance Study (FAST) [or include title in national language]

I confirm that: (please initial next to each statement to show you agree)

|                                                                                                                                                                                                                                                                                                                     |  |
|---------------------------------------------------------------------------------------------------------------------------------------------------------------------------------------------------------------------------------------------------------------------------------------------------------------------|--|
| <p>I have obtained written and oral information about the research project and I am informed about the aim, methods, benefits and risks of participating in the study.</p>                                                                                                                                          |  |
| <p>I have read and have understood the information sheet [version number] for the above study. I have had the opportunity to consider the information, ask questions and have had these answered satisfactorily.</p>                                                                                                |  |
| <p>I understand that taking part in the study involves completing a screening visit plus 6 clinical investigation days during which I will need to consume foods, provide blood [urine, and faeces] samples and fill in questionnaires.</p>                                                                         |  |
| <p>I understand that I will not be able to donate blood for the duration of my participation in the study.</p>                                                                                                                                                                                                      |  |
| <p>I understand that my participation is voluntary and that I am free to stop taking part and can withdraw from the study prior to anonymization of the data (1<sup>st</sup> March 2023) without giving any reason and without my rights being affected.</p>                                                        |  |
| <p>I understand that I can ask for access to the data I provide and I can request the destruction of that data at any time prior to anonymization of the data [add date]. I understand that after anonymization of the data, I will no longer be able to request access to or withdrawal of the data I provide.</p> |  |

## Appendices: Informed Consent Materials and GDPR

|                                                                                                                                                                                                                                                                       |  |
|-----------------------------------------------------------------------------------------------------------------------------------------------------------------------------------------------------------------------------------------------------------------------|--|
|                                                                                                                                                                                                                                                                       |  |
| I understand that the data, including any identifiable data I provide will be held securely and in line with data protection requirements at [add institution].                                                                                                       |  |
| I understand that pseudo-anonymised data (including my participant number) will be sent to other partners within the larger EU project for testing and analysis.                                                                                                      |  |
| I understand that pseudo-anonymised data may also be shared with other researchers who are not working on this study for future research purposes in the public interest.                                                                                             |  |
| I understand that fully anonymised data (after destruction of the ID-log) will be made available to the public (open access). As a result other external organisations or researchers will be also able to access these anonymised data for future research purposes. |  |
| I understand that my anonymised data will be retained indefinitely on password-protected computers at [add institution].                                                                                                                                              |  |
| I consent to participate in the above study.                                                                                                                                                                                                                          |  |
| [Remove if not applicable] I consent that my biological material will be stored in a research biobank at the [enter University].                                                                                                                                      |  |
| I have received a copy of this informed consent form as well as a copy of the Participant Information Sheet ([version number]) and a copy of the General Data Protection Regulation information sheet ([version number]).                                             |  |

Participant name: \_\_\_\_\_

Date: \_\_\_\_\_ Signature: \_\_\_\_\_

## Appendices: Informed Consent Materials and GDPR

In case new information that has substantial influence on your health emerges from the research project, you will be informed. If you would prefer **not** to be informed about such information please mark it here \_\_\_\_\_ (insert X).

**Consent from the study staff that provided the oral information:**

I declare, that the participant has received both written and oral information about the research project.

I declare to the best of my knowledge and belief that the participant has received sufficient information to decide to participate in the research project.

Study staff name: \_\_\_\_\_

Date: \_\_\_\_\_ Signature: \_\_\_\_\_

National project identification: [include e.g. ethical approval number from ethical committee and date of approval]

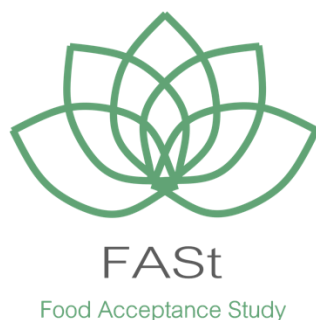

Institutional logo

**General Data Protection Regulation (GDPR) information for study participants**

**What data will be collected, how will they be used and who will see them?**



## Appendices: Informed Consent Materials and GDPR

In relation to your participation in the Food Acceptance Study (FAST), a range of data will be collected from you. This document explains how your data will be used.

### 1. Which data will be collected and how?

The data collected includes information about health and personal data e.g. name, [civil registration number if relevant, include name/type], contact information, gender and ethnicity and biological material (i.e. blood[,urine and faeces]). The data is registered in a personal participant folder and/or in an electronic database.

Data and biological material that is sent from the intervention site to other laboratories or researchers will contain a participant number but never your name or any other personal identifying data.

The investigators and other data processors will ensure that the information collected about you is not accessed by unauthorized persons and that your identity is protected when the results of the study are published. The online questionnaire delivery platform collecting body sensations and other measures will only use basic cookies to enable the proper functioning of the program. No marketing or other tracking cookies will be used.

### 2. How will my data be stored?

The investigators and the data manager will take all necessary security precautions to ensure that any identifying information about you is kept confidential and stored securely in accordance with local law [include name/references] and EU Regulation.

You will be assigned a unique ID number which your data will be identified by throughout the study. All electronic forms of data will be protected with a password which can only be accessed by the researchers. All data recorded on paper will be locked in study-specific storage cabinets accessible only to the researchers on the project.

## Appendices: Informed Consent Materials and GDPR

### 3. How long will my data be stored for?

*Pseudo-anonymised data* (including your participant ID) will be stored for up to 5 years. At that point, the participant ID-log will be destroyed and the pseudo-anonymised data will become fully anonymised data.

*Fully anonymised data* (not including your participant ID) after completion of the study will be retained indefinitely in an open-access repository (see point 7. *Will my data be archived for use in other research projects in the future* below).

Your biological samples (i.e. blood[, urine and faeces]) will be stored temporarily at the intervention site in freezers at either -20 or -80°C and later sent to other specialist laboratories for analysis. Once the biological material has been analysed for results related to this study, it will be destroyed by the laboratory. Destruction will happen at the latest by [2025] (five years after the study has ended).

[A research biobank contains biological material that is stored for future related research. If you wish to donate any excess of your biological material from this study to the research biobank of the [add university or other identifying name]), you must state it separately below. The donation is completely voluntary and does not affect your participation in this study. Samples in the biobank of the [university name] consist of a small amount (e.g. 5 ml blood [amend as suitable]), and are stored at [include name of intervention site] in freezers at -80 ° C for a maximum of 15 years after the study has ended. In order to conduct new analyses of your biological material from this biobank in a new study, the national ethical committee must first approve the study. You can always contact the intervention site and ask to have your samples in the biobank destroyed, unless the samples have been totally anonymised beforehand, which means that no one, nor the principal investigator, can longer assign the material to you. Sample full anonymization will take place alongside full anonymisation of all other data, after 5 years from study termination at the latest.]

### 4. What measures are in place to protect the security and confidentiality of my data?

The site-principal investigator will store an identifier (ID)-log (“key”) that associates your participant number with your personal information. This ID-log

## Appendices: Informed Consent Materials and GDPR

is stored at the intervention site separately from data and biological material in a locked room. Only a few relevant persons from the study staff have access to the ID-log including national and international authorities controlling clinical research projects e.g. the local ethical committee [and if relevant, include other local authorities]. The ID-log will be used to identify you in case it is relevant. The ID-log will be stored at the intervention site as long as it is relevant to have your contact information and for ethical and legal considerations related to the conduct of the study. The ID-log will be stored for a maximum of 5 years after the study has ended.

### **5. How will my data be used?**

The data collected will be securely forwarded to a project data hub at the University of Navarra (Spain) and subsequently used for analysis.

In case you withdraw from the study, the data already collected from you may be used and included in the analyses if the researchers find it important for the quality of the study. Already collected data from you will therefore only be processed if it is fair and important for the study. However, you may request that your data are destroyed and no further use is made of them. Please note, it will not be possible to withdraw your data after the results have been processed (this may be approximately 3 months after the study has ended, or by the 1<sup>st</sup> of March 2023).

The results of the study, regardless of whether they are positive, negative or inconclusive, will be written-up and submitted for publication after the end of the study e.g. as a publication in a journal, a summary of the test results on the Internet or at [www.clinicaltrials.gov](http://www.clinicaltrials.gov). Published results do not contain any information that can identify you.

### **6. Who will have access to my data?**

Your pseudo-anonymised data (including your participant number) will be securely sent to other partners within the larger EU project e.g. the University of Navarra (Spain) and the University of Surrey (UK) for analysis and your pseudo-anonymised biological material will be sent to partner laboratories, e.g. Bioiatriki S.A. (Athens, Greece) for testing and analysis. Data and biological material are

## Appendices: Informed Consent Materials and GDPR

only sent from the intervention site to other laboratories with your participant number and never your name or other personal identifying data.

Pseudo-anonymised data may also be shared with other researchers who are not working on this study for future research purposes in the public interest.

After full anonymisation (destruction of the participant ID-log) the data collected in this study will be made available to the public (open access) by depositing it in an open access repository or other related archive. As a result, other external organisations or researchers will be also able to apply to access these fully anonymised data.

### **7. Will my data be archived for use in other research projects in the future?**

Yes. We will make the fully anonymised data available to other organisations or researchers by depositing it in an open access repository or other archive. It is important that you understand that your data will be completely anonymised for these purposes, therefore there will be no way that you can be identified.

### **8. How will my data be destroyed?**

The ID-log for all data will be stored for a maximum of 5 years after the study has ended. After that point, the ID-log will be destroyed and all data will be fully anonymized. After full anonymisation data will be available to the public (open access).

Any excess biological material will be destroyed by the handling laboratories after the analyses have been completed [keep/remove: unless you have chosen to donate some to a biobank in your local country. If this is the case, biobank material will be destroyed after 15 years following the termination of the study (i.e. by 2035)].

I confirm that I have read and agree to the above information about the handling, processing and storage of my personal information in this study

## Appendices: Informed Consent Materials and GDPR

as well as data sharing procedures between external partners within this larger EU project and other external organisations.

[Please, consider if you want to donate excess material for the biobank:

**Yes**, I want to donate potential excess biological material from me to a biobank.

**No**, I do not want to donate potential excess biological material from me to a biobank.]

**Participant's signature:**

---

---

Date  
Signature

Name

**Researcher's signature:**

---

---

Date  
Signature

Name

# Reporting checklist for protocol of a clinical trial.

Based on the SPIRIT guidelines.

## Instructions to authors

Complete this checklist by entering the page numbers from your manuscript where readers will find each of the items listed below.

Your article may not currently address all the items on the checklist. Please modify your text to include the missing information. If you are certain that an item does not apply, please write "n/a" and provide a short explanation.

Upload your completed checklist as an extra file when you submit to a journal.

In your methods section, say that you used the SPIRIT reporting guidelines, and cite them as:

Chan A-W, Tetzlaff JM, Gøtzsche PC, Altman DG, Mann H, Berlin J, Dickersin K, Hróbjartsson A, Schulz KF, Parulekar WR, Krleža-Jerić K, Laupacis A, Moher D. SPIRIT 2013 Explanation and Elaboration: Guidance for protocols of clinical trials. *BMJ*. 2013;346:e7586

|                                             |                     | Reporting Item                                                                                               | Page Number             |
|---------------------------------------------|---------------------|--------------------------------------------------------------------------------------------------------------|-------------------------|
| <b>Administrative information</b>           |                     |                                                                                                              |                         |
| Title                                       | <a href="#">#1</a>  | Descriptive title identifying the study design, population, interventions, and, if applicable, trial acronym | 1                       |
| Trial registration                          | <a href="#">#2a</a> | Trial identifier and registry name. If not yet registered, name of intended registry                         | 12                      |
| Trial registration: data set                | <a href="#">#2b</a> | All items from the World Health Organization Trial Registration Data Set                                     | Supplemental Material 6 |
| Protocol version                            | <a href="#">#3</a>  | Date and version identifier                                                                                  | 6                       |
| Funding                                     | <a href="#">#4</a>  | Sources and types of financial, material, and other support                                                  | 15                      |
| Roles and responsibilities: contributorship | <a href="#">#5a</a> | Names, affiliations, and roles of protocol contributors                                                      | 16                      |

|    |                      |                     |                                                     |          |
|----|----------------------|---------------------|-----------------------------------------------------|----------|
| 1  | Roles and            | <a href="#">#5b</a> | Name and contact information for the trial          | 15       |
| 2  | responsibilities:    |                     | sponsor                                             |          |
| 3  | sponsor contact      |                     |                                                     |          |
| 4  | information          |                     |                                                     |          |
| 5  |                      |                     |                                                     |          |
| 6  |                      |                     |                                                     |          |
| 7  | Roles and            | <a href="#">#5c</a> | Role of study sponsor and funders, if any, in       | 15       |
| 8  | responsibilities:    |                     | study design; collection, management, analysis,     |          |
| 9  | sponsor and funder   |                     | and interpretation of data; writing of the report;  |          |
| 10 |                      |                     | and the decision to submit the report for           |          |
| 11 |                      |                     | publication, including whether they will have       |          |
| 12 |                      |                     | ultimate authority over any of these activities     |          |
| 13 |                      |                     |                                                     |          |
| 14 |                      |                     |                                                     |          |
| 15 |                      |                     |                                                     |          |
| 16 |                      |                     |                                                     |          |
| 17 | Roles and            | <a href="#">#5d</a> | Composition, roles, and responsibilities of the     | 7 and 15 |
| 18 | responsibilities:    |                     | coordinating centre, steering committee,            |          |
| 19 | committees           |                     | endpoint adjudication committee, data               |          |
| 20 |                      |                     | management team, and other individuals or           |          |
| 21 |                      |                     | groups overseeing the trial, if applicable (see     |          |
| 22 |                      |                     | Item 21a for data monitoring committee)             |          |
| 23 |                      |                     |                                                     |          |
| 24 |                      |                     |                                                     |          |
| 25 |                      |                     |                                                     |          |
| 26 |                      |                     |                                                     |          |
| 27 | <b>Introduction</b>  |                     |                                                     |          |
| 28 |                      |                     |                                                     |          |
| 29 | Background and       | <a href="#">#6a</a> | Description of research question and justification  | 4        |
| 30 | rationale            |                     | for undertaking the trial, including summary of     |          |
| 31 |                      |                     | relevant studies (published and unpublished)        |          |
| 32 |                      |                     | examining benefits and harms for each               |          |
| 33 |                      |                     | intervention                                        |          |
| 34 |                      |                     |                                                     |          |
| 35 |                      |                     |                                                     |          |
| 36 |                      |                     |                                                     |          |
| 37 |                      |                     |                                                     |          |
| 38 | Background and       | <a href="#">#6b</a> | Explanation for choice of comparators               | 4        |
| 39 | rationale: choice of |                     |                                                     |          |
| 40 | comparators          |                     |                                                     |          |
| 41 |                      |                     |                                                     |          |
| 42 |                      |                     |                                                     |          |
| 43 | Objectives           | <a href="#">#7</a>  | Specific objectives or hypotheses                   | 5        |
| 44 |                      |                     |                                                     |          |
| 45 |                      |                     |                                                     |          |
| 46 | Trial design         | <a href="#">#8</a>  | Description of trial design including type of trial | 6        |
| 47 |                      |                     | (eg, parallel group, crossover, factorial, single   |          |
| 48 |                      |                     | group), allocation ratio, and framework (eg,        |          |
| 49 |                      |                     | superiority, equivalence, non-inferiority,          |          |
| 50 |                      |                     | exploratory)                                        |          |
| 51 |                      |                     |                                                     |          |
| 52 |                      |                     |                                                     |          |
| 53 |                      |                     |                                                     |          |

**Methods:  
Participants,  
interventions, and  
outcomes**

|    |                                 |                      |                                                                                                                                                                                                                                                                                                                                                                                |                                   |
|----|---------------------------------|----------------------|--------------------------------------------------------------------------------------------------------------------------------------------------------------------------------------------------------------------------------------------------------------------------------------------------------------------------------------------------------------------------------|-----------------------------------|
| 1  | Study setting                   | <a href="#">#9</a>   | Description of study settings (eg, community clinic, academic hospital) and list of countries where data will be collected. Reference to where list of study sites can be obtained                                                                                                                                                                                             | 7                                 |
| 2  |                                 |                      |                                                                                                                                                                                                                                                                                                                                                                                |                                   |
| 3  |                                 |                      |                                                                                                                                                                                                                                                                                                                                                                                |                                   |
| 4  |                                 |                      |                                                                                                                                                                                                                                                                                                                                                                                |                                   |
| 5  |                                 |                      |                                                                                                                                                                                                                                                                                                                                                                                |                                   |
| 6  |                                 |                      |                                                                                                                                                                                                                                                                                                                                                                                |                                   |
| 7  |                                 |                      |                                                                                                                                                                                                                                                                                                                                                                                |                                   |
| 8  | Eligibility criteria            | <a href="#">#10</a>  | Inclusion and exclusion criteria for participants. If applicable, eligibility criteria for study centres and individuals who will perform the interventions (eg, surgeons, psychotherapists)                                                                                                                                                                                   | 7 & Supplemental Material 1       |
| 9  |                                 |                      |                                                                                                                                                                                                                                                                                                                                                                                |                                   |
| 10 |                                 |                      |                                                                                                                                                                                                                                                                                                                                                                                |                                   |
| 11 |                                 |                      |                                                                                                                                                                                                                                                                                                                                                                                |                                   |
| 12 |                                 |                      |                                                                                                                                                                                                                                                                                                                                                                                |                                   |
| 13 |                                 |                      |                                                                                                                                                                                                                                                                                                                                                                                |                                   |
| 14 | Interventions: description      | <a href="#">#11a</a> | Interventions for each group with sufficient detail to allow replication, including how and when they will be administered                                                                                                                                                                                                                                                     | 7-8                               |
| 15 |                                 |                      |                                                                                                                                                                                                                                                                                                                                                                                |                                   |
| 16 |                                 |                      |                                                                                                                                                                                                                                                                                                                                                                                |                                   |
| 17 |                                 |                      |                                                                                                                                                                                                                                                                                                                                                                                |                                   |
| 18 |                                 |                      |                                                                                                                                                                                                                                                                                                                                                                                |                                   |
| 19 |                                 |                      |                                                                                                                                                                                                                                                                                                                                                                                |                                   |
| 20 | Interventions: modifications    | <a href="#">#11b</a> | Criteria for discontinuing or modifying allocated interventions for a given trial participant (eg, drug dose change in response to harms, participant request, or improving / worsening disease)                                                                                                                                                                               | N/A not required                  |
| 21 |                                 |                      |                                                                                                                                                                                                                                                                                                                                                                                |                                   |
| 22 |                                 |                      |                                                                                                                                                                                                                                                                                                                                                                                |                                   |
| 23 |                                 |                      |                                                                                                                                                                                                                                                                                                                                                                                |                                   |
| 24 |                                 |                      |                                                                                                                                                                                                                                                                                                                                                                                |                                   |
| 25 |                                 |                      |                                                                                                                                                                                                                                                                                                                                                                                |                                   |
| 26 |                                 |                      |                                                                                                                                                                                                                                                                                                                                                                                |                                   |
| 27 | Interventions: adherence        | <a href="#">#11c</a> | Strategies to improve adherence to intervention protocols, and any procedures for monitoring adherence (eg, drug tablet return; laboratory tests)                                                                                                                                                                                                                              | N/A Not required                  |
| 28 |                                 |                      |                                                                                                                                                                                                                                                                                                                                                                                |                                   |
| 29 |                                 |                      |                                                                                                                                                                                                                                                                                                                                                                                |                                   |
| 30 |                                 |                      |                                                                                                                                                                                                                                                                                                                                                                                |                                   |
| 31 |                                 |                      |                                                                                                                                                                                                                                                                                                                                                                                |                                   |
| 32 |                                 |                      |                                                                                                                                                                                                                                                                                                                                                                                |                                   |
| 33 |                                 |                      |                                                                                                                                                                                                                                                                                                                                                                                |                                   |
| 34 | Interventions: concomitant care | <a href="#">#11d</a> | Relevant concomitant care and interventions that are permitted or prohibited during the trial                                                                                                                                                                                                                                                                                  | N/A participants are not patients |
| 35 |                                 |                      |                                                                                                                                                                                                                                                                                                                                                                                |                                   |
| 36 |                                 |                      |                                                                                                                                                                                                                                                                                                                                                                                |                                   |
| 37 | Outcomes                        | <a href="#">#12</a>  | Primary, secondary, and other outcomes, including the specific measurement variable (eg, systolic blood pressure), analysis metric (eg, change from baseline, final value, time to event), method of aggregation (eg, median, proportion), and time point for each outcome. Explanation of the clinical relevance of chosen efficacy and harm outcomes is strongly recommended | 12                                |
| 38 |                                 |                      |                                                                                                                                                                                                                                                                                                                                                                                |                                   |
| 39 |                                 |                      |                                                                                                                                                                                                                                                                                                                                                                                |                                   |
| 40 |                                 |                      |                                                                                                                                                                                                                                                                                                                                                                                |                                   |
| 41 |                                 |                      |                                                                                                                                                                                                                                                                                                                                                                                |                                   |
| 42 |                                 |                      |                                                                                                                                                                                                                                                                                                                                                                                |                                   |
| 43 |                                 |                      |                                                                                                                                                                                                                                                                                                                                                                                |                                   |
| 44 |                                 |                      |                                                                                                                                                                                                                                                                                                                                                                                |                                   |
| 45 |                                 |                      |                                                                                                                                                                                                                                                                                                                                                                                |                                   |
| 46 |                                 |                      |                                                                                                                                                                                                                                                                                                                                                                                |                                   |
| 47 |                                 |                      |                                                                                                                                                                                                                                                                                                                                                                                |                                   |
| 48 |                                 |                      |                                                                                                                                                                                                                                                                                                                                                                                |                                   |
| 49 |                                 |                      |                                                                                                                                                                                                                                                                                                                                                                                |                                   |
| 50 | Participant timeline            | <a href="#">#13</a>  | Time schedule of enrolment, interventions (including any run-ins and washouts), assessments, and visits for participants. A schematic diagram is highly recommended (see Figure)                                                                                                                                                                                               | 7                                 |
| 51 |                                 |                      |                                                                                                                                                                                                                                                                                                                                                                                |                                   |
| 52 |                                 |                      |                                                                                                                                                                                                                                                                                                                                                                                |                                   |
| 53 |                                 |                      |                                                                                                                                                                                                                                                                                                                                                                                |                                   |
| 54 |                                 |                      |                                                                                                                                                                                                                                                                                                                                                                                |                                   |
| 55 |                                 |                      |                                                                                                                                                                                                                                                                                                                                                                                |                                   |
| 56 |                                 |                      |                                                                                                                                                                                                                                                                                                                                                                                |                                   |
| 57 |                                 |                      |                                                                                                                                                                                                                                                                                                                                                                                |                                   |
| 58 |                                 |                      |                                                                                                                                                                                                                                                                                                                                                                                |                                   |
| 59 |                                 |                      |                                                                                                                                                                                                                                                                                                                                                                                |                                   |
| 60 |                                 |                      |                                                                                                                                                                                                                                                                                                                                                                                |                                   |



|    |                           |                      |                                                       |                         |
|----|---------------------------|----------------------|-------------------------------------------------------|-------------------------|
| 1  | Sample size               | <a href="#">#14</a>  | Estimated number of participants needed to            | 6                       |
| 2  |                           |                      | achieve study objectives and how it was               |                         |
| 3  |                           |                      | determined, including clinical and statistical        |                         |
| 4  |                           |                      | assumptions supporting any sample size                |                         |
| 5  |                           |                      | calculations                                          |                         |
| 6  |                           |                      |                                                       |                         |
| 7  |                           |                      |                                                       |                         |
| 8  |                           |                      |                                                       |                         |
| 9  | Recruitment               | <a href="#">#15</a>  | Strategies for achieving adequate participant         | 8                       |
| 10 |                           |                      | enrolment to reach target sample size                 |                         |
| 11 |                           |                      |                                                       |                         |
| 12 |                           |                      |                                                       |                         |
| 13 | <b>Methods:</b>           |                      |                                                       |                         |
| 14 | <b>Assignment of</b>      |                      |                                                       |                         |
| 15 | <b>interventions (for</b> |                      |                                                       |                         |
| 16 | <b>controlled trials)</b> |                      |                                                       |                         |
| 17 |                           |                      |                                                       |                         |
| 18 |                           |                      |                                                       |                         |
| 19 |                           |                      |                                                       |                         |
| 20 | Allocation: sequence      | <a href="#">#16a</a> | Method of generating the allocation sequence          | 8-9                     |
| 21 | generation                |                      | (eg, computer-generated random numbers), and          |                         |
| 22 |                           |                      | list of any factors for stratification. To reduce     |                         |
| 23 |                           |                      | predictability of a random sequence, details of       |                         |
| 24 |                           |                      | any planned restriction (eg, blocking) should be      |                         |
| 25 |                           |                      | provided in a separate document that is               |                         |
| 26 |                           |                      | unavailable to those who enrol participants or        |                         |
| 27 |                           |                      | assign interventions                                  |                         |
| 28 |                           |                      |                                                       |                         |
| 29 |                           |                      |                                                       |                         |
| 30 |                           |                      |                                                       |                         |
| 31 |                           |                      |                                                       |                         |
| 32 |                           |                      |                                                       |                         |
| 33 | Allocation                | <a href="#">#16b</a> | Mechanism of implementing the allocation              | 9                       |
| 34 | concealment               |                      | sequence (eg, central telephone; sequentially         |                         |
| 35 | mechanism                 |                      | numbered, opaque, sealed envelopes),                  |                         |
| 36 |                           |                      | describing any steps to conceal the sequence          |                         |
| 37 |                           |                      | until interventions are assigned                      |                         |
| 38 |                           |                      |                                                       |                         |
| 39 |                           |                      |                                                       |                         |
| 40 |                           |                      |                                                       |                         |
| 41 | Allocation:               | <a href="#">#16c</a> | Who will generate the allocation sequence, who        | 8                       |
| 42 | implementation            |                      | will enrol participants, and who will assign          |                         |
| 43 |                           |                      | participants to interventions                         |                         |
| 44 |                           |                      |                                                       |                         |
| 45 |                           |                      |                                                       |                         |
| 46 | Blinding (masking)        | <a href="#">#17a</a> | Who will be blinded after assignment to               | 9                       |
| 47 |                           |                      | interventions (eg, trial participants, care           |                         |
| 48 |                           |                      | providers, outcome assessors, data analysts),         |                         |
| 49 |                           |                      | and how                                               |                         |
| 50 |                           |                      |                                                       |                         |
| 51 |                           |                      |                                                       |                         |
| 52 |                           |                      |                                                       |                         |
| 53 | Blinding (masking):       | <a href="#">#17b</a> | If blinded, circumstances under which unblinding      | N/A: No safety/critical |
| 54 | emergency                 |                      | is permissible, and procedure for revealing a         | efficacy issues present |
| 55 | unblinding                |                      | participant's allocated intervention during the trial |                         |
| 56 |                           |                      |                                                       |                         |
| 57 |                           |                      |                                                       |                         |
| 58 |                           |                      |                                                       |                         |
| 59 |                           |                      |                                                       |                         |
| 60 |                           |                      |                                                       |                         |

1 **Methods: Data**  
 2 **collection,**  
 3 **management, and**  
 4 **analysis**  
 5  
 6

|    |                                                  |                      |                                                                                                                                                                                                                                                                                                                                                                                                              |
|----|--------------------------------------------------|----------------------|--------------------------------------------------------------------------------------------------------------------------------------------------------------------------------------------------------------------------------------------------------------------------------------------------------------------------------------------------------------------------------------------------------------|
| 7  |                                                  |                      |                                                                                                                                                                                                                                                                                                                                                                                                              |
| 8  | Data collection plan                             | <a href="#">#18a</a> | Plans for assessment and collection of outcome, baseline, and other trial data, including any related processes to promote data quality (eg, duplicate measurements, training of assessors) and a description of study instruments (eg, questionnaires, laboratory tests) along with their reliability and validity, if known. Reference to where data collection forms can be found, if not in the protocol |
| 9  |                                                  |                      | 15; Supplemental Material 4                                                                                                                                                                                                                                                                                                                                                                                  |
| 10 |                                                  |                      |                                                                                                                                                                                                                                                                                                                                                                                                              |
| 11 |                                                  |                      |                                                                                                                                                                                                                                                                                                                                                                                                              |
| 12 |                                                  |                      |                                                                                                                                                                                                                                                                                                                                                                                                              |
| 13 |                                                  |                      |                                                                                                                                                                                                                                                                                                                                                                                                              |
| 14 |                                                  |                      |                                                                                                                                                                                                                                                                                                                                                                                                              |
| 15 |                                                  |                      |                                                                                                                                                                                                                                                                                                                                                                                                              |
| 16 |                                                  |                      |                                                                                                                                                                                                                                                                                                                                                                                                              |
| 17 |                                                  |                      |                                                                                                                                                                                                                                                                                                                                                                                                              |
| 18 |                                                  |                      |                                                                                                                                                                                                                                                                                                                                                                                                              |
| 19 |                                                  |                      |                                                                                                                                                                                                                                                                                                                                                                                                              |
| 20 |                                                  |                      |                                                                                                                                                                                                                                                                                                                                                                                                              |
| 21 |                                                  |                      |                                                                                                                                                                                                                                                                                                                                                                                                              |
| 22 | Data collection plan: retention                  | <a href="#">#18b</a> | Plans to promote participant retention and complete follow-up, including list of any outcome data to be collected for participants who discontinue or deviate from intervention protocols                                                                                                                                                                                                                    |
| 23 |                                                  |                      | N/A Data from participants who discontinue/ deviate from protocol not collected                                                                                                                                                                                                                                                                                                                              |
| 24 |                                                  |                      |                                                                                                                                                                                                                                                                                                                                                                                                              |
| 25 |                                                  |                      |                                                                                                                                                                                                                                                                                                                                                                                                              |
| 26 |                                                  |                      |                                                                                                                                                                                                                                                                                                                                                                                                              |
| 27 |                                                  |                      |                                                                                                                                                                                                                                                                                                                                                                                                              |
| 28 |                                                  |                      |                                                                                                                                                                                                                                                                                                                                                                                                              |
| 29 |                                                  |                      |                                                                                                                                                                                                                                                                                                                                                                                                              |
| 30 | Data management                                  | <a href="#">#19</a>  | Plans for data entry, coding, security, and storage, including any related processes to promote data quality (eg, double data entry; range checks for data values). Reference to where details of data management procedures can be found, if not in the protocol                                                                                                                                            |
| 31 |                                                  |                      | 15; appendices                                                                                                                                                                                                                                                                                                                                                                                               |
| 32 |                                                  |                      |                                                                                                                                                                                                                                                                                                                                                                                                              |
| 33 |                                                  |                      |                                                                                                                                                                                                                                                                                                                                                                                                              |
| 34 |                                                  |                      |                                                                                                                                                                                                                                                                                                                                                                                                              |
| 35 |                                                  |                      |                                                                                                                                                                                                                                                                                                                                                                                                              |
| 36 |                                                  |                      |                                                                                                                                                                                                                                                                                                                                                                                                              |
| 37 |                                                  |                      |                                                                                                                                                                                                                                                                                                                                                                                                              |
| 38 |                                                  |                      |                                                                                                                                                                                                                                                                                                                                                                                                              |
| 39 |                                                  |                      |                                                                                                                                                                                                                                                                                                                                                                                                              |
| 40 | Statistics: outcomes                             | <a href="#">#20a</a> | Statistical methods for analysing primary and secondary outcomes. Reference to where other details of the statistical analysis plan can be found, if not in the protocol                                                                                                                                                                                                                                     |
| 41 |                                                  |                      | 14                                                                                                                                                                                                                                                                                                                                                                                                           |
| 42 |                                                  |                      |                                                                                                                                                                                                                                                                                                                                                                                                              |
| 43 |                                                  |                      |                                                                                                                                                                                                                                                                                                                                                                                                              |
| 44 |                                                  |                      |                                                                                                                                                                                                                                                                                                                                                                                                              |
| 45 |                                                  |                      |                                                                                                                                                                                                                                                                                                                                                                                                              |
| 46 |                                                  |                      |                                                                                                                                                                                                                                                                                                                                                                                                              |
| 47 | Statistics: additional analyses                  | <a href="#">#20b</a> | Methods for any additional analyses (eg, subgroup and adjusted analyses)                                                                                                                                                                                                                                                                                                                                     |
| 48 |                                                  |                      | N/A, no analysis included                                                                                                                                                                                                                                                                                                                                                                                    |
| 49 |                                                  |                      |                                                                                                                                                                                                                                                                                                                                                                                                              |
| 50 |                                                  |                      |                                                                                                                                                                                                                                                                                                                                                                                                              |
| 51 | Statistics: analysis population and missing data | <a href="#">#20c</a> | Definition of analysis population relating to protocol non-adherence (eg, as randomised analysis), and any statistical methods to handle missing data (eg, multiple imputation)                                                                                                                                                                                                                              |
| 52 |                                                  |                      | N/A, no analysis included                                                                                                                                                                                                                                                                                                                                                                                    |
| 53 |                                                  |                      |                                                                                                                                                                                                                                                                                                                                                                                                              |
| 54 |                                                  |                      |                                                                                                                                                                                                                                                                                                                                                                                                              |
| 55 |                                                  |                      |                                                                                                                                                                                                                                                                                                                                                                                                              |
| 56 |                                                  |                      |                                                                                                                                                                                                                                                                                                                                                                                                              |
| 57 |                                                  |                      |                                                                                                                                                                                                                                                                                                                                                                                                              |
| 58 |                                                  |                      |                                                                                                                                                                                                                                                                                                                                                                                                              |
| 59 |                                                  |                      |                                                                                                                                                                                                                                                                                                                                                                                                              |
| 60 |                                                  |                      |                                                                                                                                                                                                                                                                                                                                                                                                              |

**Methods:****Monitoring**

|    |                      |                      |                                                      |
|----|----------------------|----------------------|------------------------------------------------------|
| 1  |                      |                      |                                                      |
| 2  |                      |                      |                                                      |
| 3  |                      |                      |                                                      |
| 4  |                      |                      |                                                      |
| 5  | Data monitoring:     | <a href="#">#21a</a> | Composition of data monitoring committee             |
| 6  | formal committee     |                      | (DMC); summary of its role and reporting             |
| 7  |                      |                      | structure; statement of whether it is independent    |
| 8  |                      |                      | from the sponsor and competing interests; and        |
| 9  |                      |                      | reference to where further details about its         |
| 10 |                      |                      | charter can be found, if not in the protocol.        |
| 11 |                      |                      | Alternatively, an explanation of why a DMC is        |
| 12 |                      |                      | not needed                                           |
| 13 |                      |                      |                                                      |
| 14 |                      |                      |                                                      |
| 15 |                      |                      |                                                      |
| 16 |                      |                      |                                                      |
| 17 |                      |                      |                                                      |
| 18 | Data monitoring:     | <a href="#">#21b</a> | Description of any interim analyses and stopping     |
| 19 | interim analysis     |                      | guidelines, including who will have access to        |
| 20 |                      |                      | these interim results and make the final decision    |
| 21 |                      |                      | to terminate the trial                               |
| 22 |                      |                      |                                                      |
| 23 |                      |                      |                                                      |
| 24 | Harms                | <a href="#">#22</a>  | Plans for collecting, assessing, reporting, and      |
| 25 |                      |                      | managing solicited and spontaneously reported        |
| 26 |                      |                      | adverse events and other unintended effects of       |
| 27 |                      |                      | trial interventions or trial conduct                 |
| 28 |                      |                      |                                                      |
| 29 |                      |                      |                                                      |
| 30 |                      |                      |                                                      |
| 31 | Auditing             | <a href="#">#23</a>  | Frequency and procedures for auditing trial          |
| 32 |                      |                      | conduct, if any, and whether the process will be     |
| 33 |                      |                      | independent from investigators and the sponsor       |
| 34 |                      |                      |                                                      |
| 35 |                      |                      |                                                      |
| 36 |                      |                      |                                                      |
| 37 | <b>Ethics and</b>    |                      |                                                      |
| 38 | <b>dissemination</b> |                      |                                                      |
| 39 |                      |                      |                                                      |
| 40 | Research ethics      | <a href="#">#24</a>  | Plans for seeking research ethics committee /        |
| 41 | approval             |                      | institutional review board (REC / IRB) approval      |
| 42 |                      |                      |                                                      |
| 43 |                      |                      |                                                      |
| 44 | Protocol             | <a href="#">#25</a>  | Plans for communicating important protocol           |
| 45 | amendments           |                      | modifications (eg, changes to eligibility criteria,  |
| 46 |                      |                      | outcomes, analyses) to relevant parties (eg,         |
| 47 |                      |                      | investigators, REC / IRBs, trial participants, trial |
| 48 |                      |                      | registries, journals, regulators)                    |
| 49 |                      |                      |                                                      |
| 50 |                      |                      |                                                      |
| 51 |                      |                      |                                                      |
| 52 | Consent or assent    | <a href="#">#26a</a> | Who will obtain informed consent or assent from      |
| 53 |                      |                      | potential trial participants or authorised           |
| 54 |                      |                      | surrogates, and how (see Item 32)                    |
| 55 |                      |                      |                                                      |
| 56 |                      |                      |                                                      |
| 57 |                      |                      |                                                      |
| 58 |                      |                      |                                                      |
| 59 |                      |                      |                                                      |
| 60 |                      |                      |                                                      |

N/A: No safety/critical efficacy issues present

N/A: No safety/critical efficacy issues present

N/A: No safety/critical efficacy issues present

15

3

N/A

15

|    |                       |                      |                                                       |                         |
|----|-----------------------|----------------------|-------------------------------------------------------|-------------------------|
| 1  | Consent or assent:    | <a href="#">#26b</a> | Additional consent provisions for collection and      | N/A                     |
| 2  | ancillary studies     |                      | use of participant data and biological specimens      |                         |
| 3  |                       |                      | in ancillary studies, if applicable                   |                         |
| 4  |                       |                      |                                                       |                         |
| 5  |                       |                      |                                                       |                         |
| 6  | Confidentiality       | <a href="#">#27</a>  | How personal information about potential and          | Appendices              |
| 7  |                       |                      | enrolled participants will be collected, shared,      |                         |
| 8  |                       |                      | and maintained in order to protect confidentiality    |                         |
| 9  |                       |                      | before, during, and after the trial                   |                         |
| 10 |                       |                      |                                                       |                         |
| 11 |                       |                      |                                                       |                         |
| 12 |                       |                      |                                                       |                         |
| 13 | Declaration of        | <a href="#">#28</a>  | Financial and other competing interests for           | 15                      |
| 14 | interests             |                      | principal investigators for the overall trial and     |                         |
| 15 |                       |                      | each study site                                       |                         |
| 16 |                       |                      |                                                       |                         |
| 17 |                       |                      |                                                       |                         |
| 18 | Data access           | <a href="#">#29</a>  | Statement of who will have access to the final        | 15                      |
| 19 |                       |                      | trial dataset, and disclosure of contractual          |                         |
| 20 |                       |                      | agreements that limit such access for                 |                         |
| 21 |                       |                      | investigators                                         |                         |
| 22 |                       |                      |                                                       |                         |
| 23 |                       |                      |                                                       |                         |
| 24 |                       |                      |                                                       |                         |
| 25 | Ancillary and post    | <a href="#">#30</a>  | Provisions, if any, for ancillary and post-trial      | N/A: No safety/critical |
| 26 | trial care            |                      | care, and for compensation to those who suffer        | efficacy issues present |
| 27 |                       |                      | harm from trial participation                         |                         |
| 28 |                       |                      |                                                       |                         |
| 29 |                       |                      |                                                       |                         |
| 30 |                       |                      |                                                       |                         |
| 31 | Dissemination         | <a href="#">#31a</a> | Plans for investigators and sponsor to                | 15                      |
| 32 | policy: trial results |                      | communicate trial results to participants,            |                         |
| 33 |                       |                      | healthcare professionals, the public, and other       |                         |
| 34 |                       |                      | relevant groups (eg, via publication, reporting in    |                         |
| 35 |                       |                      | results databases, or other data sharing              |                         |
| 36 |                       |                      | arrangements), including any publication              |                         |
| 37 |                       |                      | restrictions                                          |                         |
| 38 |                       |                      |                                                       |                         |
| 39 |                       |                      |                                                       |                         |
| 40 |                       |                      |                                                       |                         |
| 41 |                       |                      |                                                       |                         |
| 42 | Dissemination         | <a href="#">#31b</a> | Authorship eligibility guidelines and any intended    | 16                      |
| 43 | policy: authorship    |                      | use of professional writers                           |                         |
| 44 |                       |                      |                                                       |                         |
| 45 |                       |                      |                                                       |                         |
| 46 | Dissemination         | <a href="#">#31c</a> | Plans, if any, for granting public access to the full | 15                      |
| 47 | policy: reproducible  |                      | protocol, participant-level dataset, and statistical  |                         |
| 48 | research              |                      | code                                                  |                         |
| 49 |                       |                      |                                                       |                         |
| 50 |                       |                      |                                                       |                         |
| 51 | <b>Appendices</b>     |                      |                                                       |                         |
| 52 |                       |                      |                                                       |                         |
| 53 |                       |                      |                                                       |                         |
| 54 | Informed consent      | <a href="#">#32</a>  | Model consent form and other related                  | Appendices              |
| 55 | materials             |                      | documentation given to participants and               |                         |
| 56 |                       |                      | authorised surrogates                                 |                         |
| 57 |                       |                      |                                                       |                         |
| 58 |                       |                      |                                                       |                         |
| 59 |                       |                      |                                                       |                         |
| 60 |                       |                      |                                                       |                         |

1 Biological specimens [#33](#) Plans for collection, laboratory evaluation, and 12  
2 storage of biological specimens for genetic or  
3 molecular analysis in the current trial and for  
4 future use in ancillary studies, if applicable  
5  
6  
7

8 None The SPIRIT Explanation and Elaboration paper is distributed under the terms of the Creative  
9 Commons Attribution License CC-BY-NC. This checklist can be completed online using  
10 <https://www.goodreports.org/>, a tool made by the [EQUATOR Network](#) in collaboration with  
11 [Penelope.ai](#)  
12  
13  
14  
15  
16  
17  
18  
19  
20  
21  
22  
23  
24  
25  
26  
27  
28  
29  
30  
31  
32  
33  
34  
35  
36  
37  
38  
39  
40  
41  
42  
43  
44  
45  
46  
47  
48  
49  
50  
51  
52  
53  
54  
55  
56  
57  
58  
59  
60

# BMJ Open

## Acute and repeated impact of sweeteners and sweetness enhancers in solid and semi-solid foods on appetite - protocol for a multi-centre, cross-over, RCT in people with overweight/obesity: The SWEET Project

|                                 |                                                                                                                                                                                                                                                                                                                                                                                                                                                                                                                                                                                                                                                                                                                                                                                                                                                                                                                                                                                                                                                                                                                                                                                                                                                                                                                                                                                                                                                                                                                                                                                                                                                                                                                                                                                                                                                                                                                                                                                                    |
|---------------------------------|----------------------------------------------------------------------------------------------------------------------------------------------------------------------------------------------------------------------------------------------------------------------------------------------------------------------------------------------------------------------------------------------------------------------------------------------------------------------------------------------------------------------------------------------------------------------------------------------------------------------------------------------------------------------------------------------------------------------------------------------------------------------------------------------------------------------------------------------------------------------------------------------------------------------------------------------------------------------------------------------------------------------------------------------------------------------------------------------------------------------------------------------------------------------------------------------------------------------------------------------------------------------------------------------------------------------------------------------------------------------------------------------------------------------------------------------------------------------------------------------------------------------------------------------------------------------------------------------------------------------------------------------------------------------------------------------------------------------------------------------------------------------------------------------------------------------------------------------------------------------------------------------------------------------------------------------------------------------------------------------------|
| Journal:                        | <i>BMJ Open</i>                                                                                                                                                                                                                                                                                                                                                                                                                                                                                                                                                                                                                                                                                                                                                                                                                                                                                                                                                                                                                                                                                                                                                                                                                                                                                                                                                                                                                                                                                                                                                                                                                                                                                                                                                                                                                                                                                                                                                                                    |
| Manuscript ID                   | bmjopen-2022-063903.R2                                                                                                                                                                                                                                                                                                                                                                                                                                                                                                                                                                                                                                                                                                                                                                                                                                                                                                                                                                                                                                                                                                                                                                                                                                                                                                                                                                                                                                                                                                                                                                                                                                                                                                                                                                                                                                                                                                                                                                             |
| Article Type:                   | Protocol                                                                                                                                                                                                                                                                                                                                                                                                                                                                                                                                                                                                                                                                                                                                                                                                                                                                                                                                                                                                                                                                                                                                                                                                                                                                                                                                                                                                                                                                                                                                                                                                                                                                                                                                                                                                                                                                                                                                                                                           |
| Date Submitted by the Author:   | 26-Sep-2022                                                                                                                                                                                                                                                                                                                                                                                                                                                                                                                                                                                                                                                                                                                                                                                                                                                                                                                                                                                                                                                                                                                                                                                                                                                                                                                                                                                                                                                                                                                                                                                                                                                                                                                                                                                                                                                                                                                                                                                        |
| Complete List of Authors:       | Gibbons, Catherine; University of Leeds, School of Psychology<br>O'Hara, Beverley; University of Leeds, School of Psychology<br>O'Connor, Dominic; University of Leeds, School of Psychology<br>Hardman, Charlotte; University of Liverpool, Institute of Population Health<br>Wilton, Moon; University of Liverpool, Institute of Population Health<br>Harrold, Joanne; University of Liverpool, Institute of Population Health<br>Almiron-Roig, Eva; University of Navarra, Centre for Nutrition Research; Navarra Institute for Health Research, IdiSNA<br>Navas-Carretero, Santiago; University of Navarra, Centre for Nutrition Research; Navarra Institute for Health Research, IdiSNA<br>Hodgkins, Charo ; University of Surrey, Food, Consumer Behaviour and Health Research Centre, School of Psychology<br>Nazare, Julie Anne; Rhône-Alpes Research Centre for Human Nutrition<br>Alligier, Maud; Rhône-Alpes Research Centre for Human Nutrition; French Obesity Research Centre of France<br>Martínez, Jose; University of Navarra, Centre for Nutrition Research; IMDEA, Precision Nutrition Program<br>Scott, Corey; Cargill Inc<br>Kjølbaek, Louise; University of Copenhagen, Department of Nutrition, Exercise and Sports<br>Normand, Mie; University of Copenhagen, Department of Nutrition, Exercise and Sports<br>Rannou, Cécile; Oniris, UMR CNRS GEPEA 6144<br>Blaak, Ellen; Maastricht University, School of Nutrition and Translational Research in Metabolism<br>Feskens, Edith; Wageningen University, Division of Human Nutrition and Health<br>Moshoyiannis, Hariklia; Bioaitriki S. A, International Reference Laboratory Services<br>Raben, Anne; University of Copenhagen, Department of Nutrition, Exercise & Sports; Steno Diabetes Center Copenhagen, Clinical Research<br>Halford, Jason; University of Leeds, School of Psychology<br>Beaulieu, Kristine; University of Leeds, School of Psychology<br>Finlayson, G; University of Leeds, School of Psychology |
| <b>Primary Subject Heading</b>: | Nutrition and metabolism                                                                                                                                                                                                                                                                                                                                                                                                                                                                                                                                                                                                                                                                                                                                                                                                                                                                                                                                                                                                                                                                                                                                                                                                                                                                                                                                                                                                                                                                                                                                                                                                                                                                                                                                                                                                                                                                                                                                                                           |

1  
2  
3  
4  
5  
6  
7  
8  
9  
10  
11  
12  
13  
14  
15  
16  
17  
18  
19  
20  
21  
22  
23  
24  
25  
26  
27  
28  
29  
30  
31  
32  
33  
34  
35  
36  
37  
38  
39  
40  
41  
42  
43  
44  
45  
46  
47  
48  
49  
50  
51  
52  
53  
54  
55  
56  
57  
58  
59  
60

|                            |                                                                                                                                                              |
|----------------------------|--------------------------------------------------------------------------------------------------------------------------------------------------------------|
| Secondary Subject Heading: | Public health                                                                                                                                                |
| Keywords:                  | Protocols & guidelines < HEALTH SERVICES ADMINISTRATION & MANAGEMENT, PUBLIC HEALTH, NUTRITION & DIETETICS, General endocrinology < DIABETES & ENDOCRINOLOGY |
|                            |                                                                                                                                                              |



1  
2  
3 1 **Acute and repeated impact of sweeteners and sweetness enhancers in solid and semi-**  
4 **solid foods on appetite - protocol for a multi-centre, cross-over, RCT in people with**  
5 **overweight/obesity: The SWEET Project**  
6  
7  
8  
9

10 **Authors:** Catherine Gibbons<sup>1\*</sup>, Beverley O'Hara<sup>1\*</sup>, Dominic O'Connor<sup>1</sup>, Charlotte A  
11 Hardman<sup>2</sup>, Moon M Wilton<sup>2</sup>, Joanne A Harrold<sup>2</sup>, Eva Almiron-Roig<sup>3,4</sup>, Santiago Navas-  
12 Carretero<sup>3,4</sup>, Charo E Hodgkins<sup>5</sup>, Julie-Anne Nazare<sup>6</sup>, Maud Alligier<sup>6,7</sup>, J Alfredo Martinez<sup>3,8</sup>,  
13 Corey Scott<sup>9</sup>, Louise Kjølbaek<sup>10</sup>, Mie Normand<sup>10</sup>, Cécile Rannou<sup>11</sup>, Ellen E Blaak<sup>12</sup>, Edith J  
14 M Feskens<sup>13</sup>, Hariklia Moshoyiannis<sup>14</sup>, Anne Raben<sup>10,15</sup>, Jason C G Halford<sup>1</sup>, Kristine  
15 Beaulieu<sup>1</sup>, Graham Finlayson<sup>1</sup>  
16  
17  
18  
19

20  
21  
22 \*Contributed equally.  
23

24 Correspondence to Dr Catherine Gibbons; c.gibbons@leeds.ac.uk  
25  
26

27 **Affiliations:**

28  
29 <sup>1</sup>School of Psychology, Faculty of Medicine & Health, University of Leeds, UK

30 <sup>2</sup>Department of Psychology, Institute of Population Health, University of Liverpool, UK

31 <sup>3</sup>Centre for Nutrition Research, University of Navarra, Spain

32 <sup>4</sup>Navarra Institute for Health Research, IdiSNA, Pamplona, Spain

33 <sup>5</sup>Food, Consumer Behaviour and Health Research Centre, School of Psychology, University  
34 of Surrey, UK

35 <sup>6</sup>Human Nutrition Research Center Rhône-Alpes, Lyon 1 Claude Bernard University, France

36 <sup>7</sup>French Obesity Research Centre of Excellence, France

37 <sup>8</sup>Precision Nutrition Program, IMDEA, Madrid, Spain

38 <sup>9</sup>Core Research and Development, Cargill, Inc, USA

39 <sup>10</sup>Department of Nutrition, Exercise and Sports, University of Copenhagen, Denmark

40 <sup>11</sup>UMR CNRS GEPEA 6144, Oniris, France

41 <sup>12</sup>School of Nutrition and Translational Research in Metabolism, University of Maastricht,  
42 The Netherlands

43 <sup>13</sup>Division of Human Nutrition and Health, Wageningen University, Wageningen,  
44 Netherlands

45 <sup>14</sup>International Reference Laboratory Services, Bioiatriki S.A., Athens, Greece

46 <sup>15</sup>Clinical Research, Copenhagen University Hospital – Steno Diabetes Center Copenhagen,  
47 Herlev, Denmark  
48  
49  
50  
51  
52  
53  
54  
55  
56  
57  
58  
59  
60



1  
2  
3 35  
4  
5 36  
6  
7 37  
8 38 **Word Count: 4568**  
9

For peer review only

10  
11  
12  
13  
14  
15  
16  
17  
18  
19  
20  
21  
22  
23  
24  
25  
26  
27  
28  
29  
30  
31  
32  
33  
34  
35  
36  
37  
38  
39  
40  
41  
42  
43  
44  
45  
46  
47  
48  
49  
50  
51  
52  
53  
54  
55  
56  
57  
58  
59  
60

## 39 Abstract

40 **Introduction:** Intake of free sugars in European countries is high and attempts to reduce  
41 sugar intake have been mostly ineffective. Non-nutritive sweeteners and sweetness enhancers  
42 (S&SEs) can maintain sweet taste in the absence of energy, but little is known about the  
43 impact of acute and repeated consumption of S&SE in foods these products on appetite. This  
44 study aims to evaluate the effect of acute and repeated consumption of 2 individual S&SEs  
45 and 2 S&SE blends in semi-solid and solid foods on appetite and related behavioural,  
46 metabolic and health outcomes.

47 **Methods and Analysis:** A work package of the SWEET project, this study consists of 5  
48 double-blind randomised cross-over trials which will be carried out at 5 sites across 4  
49 European countries, aiming to have n=213. Five food matrices will be tested across 3  
50 formulations (sucrose-sweetened control versus 2 reformulated products with S&SE blends  
51 and no added sugar). Participants (body mass index (BMI) 25-35 kg/m<sup>2</sup>; aged 18-60 years)  
52 will consume each formulation for 14 days. The primary endpoint is composite appetite score  
53 (hunger, inverse of fullness, desire to eat and prospective food consumption) over a 3-hour  
54 postprandial incremental area under the curve during clinical investigation days on day 1 and  
55 14.

56 **Ethics and dissemination:** The trial has been approved by national ethical committees and  
57 will be conducted in accordance with the Declaration of Helsinki. Results will be published  
58 in international peer-reviewed open access scientific journals. Research data from the trial  
59 will be deposited in an open access online research data archive.

60 **Trial registration number:** Clinicaltrials.gov: NCT04633681

## 62 Strengths and Limitations of this study:

- 63 • The trial is the first of its kind to investigate the effects of acute and repeated exposure to  
64 2 individual S&SE and 2 S&SE blends in 5 different sweet food products across a variety  
65 of matrices including bakery (cakes and biscuits), dairy (yoghurt), confectionary  
66 (chocolate) and breakfast cereal.
- 67 • This trial includes a large range of outcomes across behaviour, physiology, and health  
68 from persons living in Northern, Central and Southern Europe.
- 69 • The COVID-19 pandemic resulted in changes to the design of the studies in the trial.  
70 Originally, all products were to be tested across 2 sites, but the reduced time frame means  
71 this is not possible for some products.

- 1  
2  
3 72 • Due to COVID-19 disruptions the number of participants in 2 of the 5 studies will be  
4 73 reduced. Blood samples will not be taken in one of these smaller studies. Outcomes will  
5 74 be reported descriptively in these 2 studies where appropriate.  
6  
7 75  
8  
9

## 10 76 **BACKGROUND AND RATIONALE**

11 77 The global increase in the prevalence of obesity and its associated diseases is driven by a  
12 78 range of internal factors, involving genetic, behavioural, and metabolic determinants along  
13 79 with permissive external factors from the physical, social, and public (nutritional) policy  
14 80 environment (1). One of the main behavioural drivers involves a diet too rich in energy intake  
15 81 relative to energy expenditure. Free sugar intake (derived from sugar added to foods and  
16 82 beverages by the manufacturer or consumer) is one nutritional component that has gained  
17 83 focus because of its low nutritional value (lack of vitamins, minerals or fibre) and its  
18 84 potential to add to overall energy consumed, facilitating weight gain (2), and potential altered  
19 85 appetite and endocrine responses to carbohydrates (sugars) relative to other macronutrients  
20 86 (3).

21 87 Simply restricting free sugars from the diet without substitution may reduce diet palatability  
22 88 or contribute to changes in sweet craving (4), particularly in women (5), resulting in poor  
23 89 acceptance.. The replacement of free sugars with non-nutritive sweeteners and sweetness  
24 90 enhancers (S&SEs) in food products is one method to reduce sugar intake while maintaining  
25 91 acceptance and palatability of the diet. S&SEs have increasingly been employed over recent  
26 92 years to reduce the energy and sugar content of foods; however, their impact on appetite- and  
27 93 health-related outcomes is somewhat unclear (6).

28 94 The effect of S&SEs on appetite is difficult to summarise due the types of studies,  
29 95 comparisons and S&SEs being used. One of the reasons for the current partial understanding  
30 96 of the appetitive and metabolic effects of S&SEs in humans is that different S&SEs are  
31 97 commonly assumed to have similar behavioural effects (6-8). Only recently, one 12-week  
32 98 investigation of 4 distinct S&SEs reported directionally dissimilar effects of saccharin  
33 99 compared to sucralose on body weight (9). A recent review comparing different S&SEs  
34 100 suggests that some have the potential to enhance appetite, but these effects do not follow  
35 101 through to subsequent energy intake (6). A recent meta-analysis detailed the impact of no- or  
36 102 low-energy sweetened preloads compared to conventionally sweetened preloads on *ad*  
37 103 *libitum* energy intake. They concluded that similar effects on energy intake were seen due to  
38 104 only partial compensation being evident (although total energy intake was lower in the no- or  
39 105 low-energy sweetener) (10). Furthermore, recent studies have highlighted that S&SEs may

1  
2  
3 106 reduce sweet food cravings and therefore reduce sugar intake (11) appetite and energy intake  
4  
5 107 (12). Overall, there is currently insufficient evidence to make a clear conclusion about the  
6  
7 108 effect of S&SEs on appetite and energy intake. Indeed, the 11 S&SEs that are currently  
8  
9 109 approved for use in the EU are chemically heterogeneous and absorbed, metabolised, and  
10  
11 110 excreted differently (13). Furthermore, most investigations of the relationship between S&SE  
12  
13 111 intake and health outcomes have used beverages as the vehicle (14) ; these have recently been  
14  
15 112 reviewed (15). Since the amount of S&SEs in the food supply is increasing in response to  
16  
17 113 consumer demand (16) and policy (e.g., 'sugar taxes'(17, 18); EU initiatives (19, 20)), there  
18  
19 114 is a pressing need to examine the appetite-related behavioural and metabolic consequences of  
20  
21 115 consuming S&SEs particularly in semi-solid and solid food matrices. Furthermore, it should  
22  
23 116 be acknowledged that differences between acute and longer-term effects of S&SEs may not  
24  
25 117 be the same (21) and this needs investigating further.

118

## 119 **AIMS AND OBJECTIVES**

120 The main objective of this study is to evaluate the acute (1-day) and repeated (14-day) effects  
121 of 2 individual S&SEs and 2 S&SE blends in reformulated reduced or no added sugar food  
122 products (using 2 modulations of S&SEs per matrix) on appetite and related behavioural,  
123 metabolic and health outcomes in adult men and women with overweight or obesity.

124 The hypotheses are:

125 **H<sub>1</sub>** Consumption of no added/reduced sugar products reformulated with S&SEs will result in  
126 an altered incremental area under the curve (iAUC) appetite score, compared with the  
127 sucrose-sweetened control product after repeated compared with acute consumption.

128

129 **H<sub>2</sub>** There will be differences between the no added/reduced sugar and sucrose-sweetened  
130 formulations on behavioural (e.g., food reward and preferences, food cravings, self-reported  
131 energy intake), metabolic (satiety peptides, glycaemic and lipaemic response) and health-  
132 related (liver function and gastrointestinal (GI) side effects) outcomes.

133

## 134 **TRIAL DESIGN**

135 This study is part of the wider SWEET project (<https://sweetproject.eu/>) funded by the  
136 European Commission Horizon 2020 program. It is a multicentre double-blind, randomised

1  
2  
3 137 cross-over trial conducted across 5 intervention sites in 4 countries, with 3 product  
4  
5 138 formulations (sucrose-sweetened control vs 2 individual S&SEs or S&SE blends) over 5  
6  
7 139 intervention product types (cake, biscuits, yoghurt, chocolate, and breakfast cereal matrices)  
8  
9 140 aiming for a total of 213 completers. The protocol is reported as per the SPIRIT reporting  
10  
11 141 guidelines (22). While this study addresses the short term impact of specific S&SEs vs added  
12  
13 142 sucrose on appetite, another work package in the SWEET project will examine the long term  
14  
15 143 (1-year) impact of a weight loss and weight maintenance intervention with or without S&SE  
16  
17 144 as part of a healthy diet (23).

145

### 146 ***Sample Size Determination***

147 The following calculations apply to the studies involving biscuit, yoghurt and chocolate  
148 matrices:

149 Primary outcome: Power calculations showed that to detect a minimum difference of 8 mm in  
150 appetite ratings on a 100 mm visual analogue scale (VAS) with 80% power, alpha 0.05, and  
151 based on a published within-subject SD of 14.4 mm in VAS measures (24), an overall sample  
152 of 53 completers (both sexes, same BMI group, across all centres) would be needed (25; p.30)  
153 per matrix. We expect this sample size will be sufficient to detect iAUC differences in the  
154 appetite response relative to control of around 8–10%, considered to be of practical relevance  
155 (26).

156 Secondary outcomes: Due to the number of secondary outcomes in this study, it was not  
157 feasible to conduct power calculations for all outcomes. However, we consulted published  
158 studies (e.g. Yeomans et al, 2016 (24)) which utilized a similar design and demonstrated  
159 effects of small nutritional manipulations on various gut peptides. In these studies, sample sizes  
160 ranged from 12-23 participants, giving us confidence that a sample of 53 participants per matrix  
161 should be sufficient to detect differences with clinical significance.

162 Due to the impact of the COVID-19 pandemic on the trial (detailed later), the cake and  
163 breakfast cereal studies were scaled down according to reduced feasibility at each intervention  
164 centre to n=24 (cake) and n=30 (breakfast cereal), and no blood samples will be collected in  
165 the cake study. The primary outcome will be reported descriptively in these 2 studies where  
166 appropriate and reflected in the study registration and protocol.

### 167 **STUDY SETTING**

1  
2  
3 168 This trial is conducted across 5 intervention sites in 4 countries across 3 regions of Europe,  
4  
5 169 with each site testing a different product, whilst following the same protocol. Western  
6  
7 170 Europe: Leeds (University of Leeds, UK) will test biscuits; Liverpool (University of  
8  
9 171 Liverpool, UK) will test chocolate; Lyon (Centre de Recherche en Nutrition Humaine Rhône  
10  
11 172 Alpes, France) will test biscuits and cakes. Northern Europe: Copenhagen (University of  
12  
13 173 Copenhagen, Denmark) will test cereal. Southern Europe: Pamplona (University of Navarra,  
14  
15 174 Spain) will test yoghurt. University's of Leeds and Navarra are the leaders of this work  
16  
17 175 package, whilst University of Liverpool is the co-ordinating centre of the SWEET project in  
18  
19 176 its entirety.

## 20 177 **PATIENT AND PUBLIC INVOLVEMENT**

21  
22 178 During the study, research staff discuss with participants about their experiences of the  
23  
24 179 clinical investigation days, examinations, participant information and written materials, etc.  
25  
26 180 with the aim to understand and improve participants' experiences in current and future  
27  
28 181 studies of this nature. This is also captured in an end of study survey.

## 30 182 **ELIGIBILITY CRITERIA**

31  
32 183 Male and female adults aged 18-60 years, with a BMI 25-35 kg/m<sup>2</sup> are eligible. Participants  
33  
34 184 are required to regularly consume sugar-containing foods and willing to consume sugar and  
35  
36 185 sweetened food products. During screening, they must have an Eating Attitudes Test (EAT-  
37  
38 186 26) (27) score <20 and a short sweet food frequency questionnaire score ≥3 of 11, in addition  
39  
40 187 to rating the control product as ≥40% on a 100-point liking VAS during the taste test and be  
41  
42 188 willing to consume the product during the duration of the trial. All exclusion criteria are  
43  
44 189 listed in **Supplemental Material 1**.

## 46 191 **INTERVENTION**

47  
48 192 Each trial will begin with an initial exposure to one of the 3 assigned product formulations  
49  
50 193 under controlled laboratory conditions (clinical investigation day, CIDs 1, 3, 5 – exposure  
51  
52 194 day 1), followed by repeated daily consumption of the same product at home for 12 (± 2  
53  
54 195 days) and a final exposure in the laboratory on day 14 (± 2 days) under identical conditions as  
55  
56 196 the first exposure (CIDs 2, 4, 6 – exposure day 14), resulting in all participants completing  
57  
58 197 the 3 products formulations in a Latin square design (see Figure 1). CIDs 2 and 4 will be  
59  
60 198 followed by a wash out period of 14-21 days between formulations. During the at-home  
199  
200 199 periods, participants will consume a portion of the product at a time and place they choose

1  
2  
3 200 using a substitution strategy for similar energy/sweetness foods in their habitual diet. Foods  
4  
5 201 habitually consumed of an equivalent energy density/sweetness are identified using  
6  
7 202 participant's answers to a food frequency questionnaire and an energy equivalent guide, with  
8  
9 203 a decision making tree developed to identify the most suitable foods to substitute for each  
10  
11 204 intervention product. This strategy is supported by advice and agreement from the research  
12  
13 205 officer/dietitian. Compliance will be monitored by an intervention booklet completed daily  
14  
15 206 and by return of empty food packaging. All food products are provided in the same blinded  
16  
17 207 container/wrapping. The study duration for each participant will be a minimum of 70 days  
18  
19 208 (plus 7-14 days allowance for extended washout to aid scheduling of CIDs).

209

### 210 **Recruitment and Screening**

211 Participants will be recruited via a variety of routes e.g., study databases, webpages, social  
212 media, posters, and flyers. Potential participants will be pre-screened using an online or  
213 telephonic pre-screening questionnaire in accordance with the inclusion and exclusion  
214 criteria. Candidates passing pre-screening will be invited to attend an information session,  
215 either online or in-person, where they will be given detailed information about the study and  
216 invited to participate in a Q&A session. Candidates who wish to participate in the study will  
217 provide written informed consent and sign a general data protection regulation (GDPR) form  
218 before being fully screened. The screening session will be performed in-person or online, and  
219 will consist of anthropometric measurements (height, weight, waist and hip circumference;  
220 all confirmed in-person at CID1 for participants being screened online); eligibility  
221 questionnaires (EAT-26 (27) and short sweet food frequency questionnaire); baseline  
222 questionnaires (A socio-demographic questionnaire, a questionnaire to assess habitual sweet  
223 food consumption, including regular and S&SE sweet foods (SWITCH sweet food frequency  
224 questionnaire (SWFFQ)) (28), a questionnaire to assess habitual physical activity  
225 (International Physical Activity Questionnaire (IPAQ)) (29) and a consumer perspective  
226 questionnaire); an eligibility taste test of the control intervention product here participants  
227 rated the pleasantness of the product on a 100mm VAS after taking one bite and chewing for  
228 5 seconds (a score of >40mm was required for inclusion into the study). Candidates who pass  
229 the screening session will be enrolled into the study.

230

### 231 **Randomisation and blinding**

232 A Latin square design (6 treatment orders) will be used to randomly allocate product  
233 sequence into blocks of 6, as shown in Figure 1. The person responsible for generating the



234 sequences for all sites will not have any study related tasks e.g., inclusion or examination of  
235 participants. Each sequence will be stratified by sex (female/male) and age group (18-45  
236 years/46-60 years). When feasible, a female/male ratio of minimum 60/40 was also  
237 considered to reflect the target population characteristics.

238 Blinding of the intervention products (reformulated and control products) will be done by the  
239 manufacturers. As such, blinding of the research and central laboratory staff will take place  
240 allowing for a double-blind intervention. Moreover, the statistical analyses of the main  
241 outcome variable will be done without breaking the intervention product-assignment code  
242 before the analyses are finalised.

243

244

245 **[Figure 1]**

246

### 247 **Clinical investigation days**

248 Prior to each CID, participants will be asked to consume a similar evening meal at the same  
249 time, before fasting for a minimum of 12 hours and a maximum of 15 hours. High intensity  
250 physical activity, alcohol, and coffee will not be allowed for 12 hours before arriving to the  
251 laboratory. Two glasses, approximately 500 mL, of non-carbonated water will be allowed  
252 during the fasting period. Participants will provide a spot urine sample collected max 24  
253 hours before each CID and will be analysed for the presence of specific S&SEs.

254

255 The CID procedures are outlined in Figure 2. CID start times will be scheduled in the  
256 morning between 8.00 am and 10.30 am and participants will start all 6 CIDs at the same  
257 time. Participants will complete a protocol compliance questionnaire to verify the above  
258 requirements regarding diet, physical activity, etc. If compliance has been breached, staff will  
259 reschedule the CID (within the maximum 14 days allowed, otherwise a protocol deviation  
260 will be recorded). If compliance has been achieved, participants will then fill in the Control  
261 of Eating Questionnaire (CoEQ)(30) to assess cravings over the last 7 days, followed by a  
262 body weight measurement. Participants will consume 200 mL of water before having an  
263 intravenous cannula inserted into an antecubital vein by qualified personnel. A baseline  
264 fasting blood sample will be taken 15 minutes after insertion of the cannula. Once the fasting  
265 sample has been taken, participants will complete fasting subjective appetite ratings for  
266 hunger, fullness, thirst, desire to eat, prospective intake, nausea, bloating, appetite for



1  
2  
3 267 something savoury and for something sweet on a validated 100-point VAS accessed via a PC  
4  
5 268 or a tablet (31, 32). These measures will be completed on an electronic Questionnaire  
6  
7 269 Delivery Platform (QDP), using separate screens for each VAS. Next, food reward will be  
8  
9 270 measured using a culturally adapted version of the Leeds Food Preference Questionnaire  
10  
11 271 (LFPQ)(33) on a computer desktop. Appetite sensations measured by VAS will be repeated  
12  
13 272 after the LFPQ and before the researcher brings the blinded intervention product served with  
14  
15 273 200 mL of water. The participant will be instructed to take one bite, then answer questions  
16  
17 274 regarding sensory-specific satiety and expected satiety by VAS (34, 35). The participant will  
18  
19 275 be asked to consume the rest of the product over a period of 5-10 minutes, depending on the  
20  
21 276 time required to consume the matrix and asked to complete a set of appetite sensation  
22  
23 277 questions by VAS at 10 min, followed by blood samples at 7-10 and 12-15 min to capture  
24  
25 278 peak PP response (36) (yoghurt will be consumed faster than other products therefore blood  
26  
27 279 samples will be taken earlier for this matrix). VAS for assessment of appetite sensation will  
28  
29 280 then be taken at 20, 30, 45, 60, 120 and 180 min with blood samples taken after VAS at 30,  
30  
31 281 60 and 120 min. The LFPQ will be repeated in the fed state after the 20-min VAS. In  
32  
33 282 between measurements, participants will remain seated in a quiet area, free from food-related  
34  
35 283 sensory stimuli and read/listen to music/use a computer (provided there is no material with  
36  
37 284 reference to food/drink). Once the 180-min appetite sensation questions by VAS is complete  
38  
39 285 the participant will be offered water or a snack before leaving the laboratory. Participants will  
40  
41 286 be reminded about the consumption of the products at home and that they will receive a  
42  
43 287 phone call the next day to complete a 24-hour diet recall and report any GI symptoms.  
44  
45 288 Following the end of the trial, participants will be debriefed if requested and offered the  
46  
47 289 chance to complete a survey about the conduct of the study.  
48

49  
50  
51  
52  
53  
54  
55  
56  
57  
58  
59  
60  
61  
62  
63  
64  
65  
66  
67  
68  
69  
70  
71  
72  
73  
74  
75  
76  
77  
78  
79  
80  
81  
82  
83  
84  
85  
86  
87  
88  
89  
90  
91  
92  
93  
94  
95  
96  
97  
98  
99  
100  
101  
102  
103  
104  
105  
106  
107  
108  
109  
110  
111  
112  
113  
114  
115  
116  
117  
118  
119  
120  
121  
122  
123  
124  
125  
126  
127  
128  
129  
130  
131  
132  
133  
134  
135  
136  
137  
138  
139  
140  
141  
142  
143  
144  
145  
146  
147  
148  
149  
150  
151  
152  
153  
154  
155  
156  
157  
158  
159  
160  
161  
162  
163  
164  
165  
166  
167  
168  
169  
170  
171  
172  
173  
174  
175  
176  
177  
178  
179  
180  
181  
182  
183  
184  
185  
186  
187  
188  
189  
190  
191  
192  
193  
194  
195  
196  
197  
198  
199  
200  
201  
202  
203  
204  
205  
206  
207  
208  
209  
210  
211  
212  
213  
214  
215  
216  
217  
218  
219  
220  
221  
222  
223  
224  
225  
226  
227  
228  
229  
230  
231  
232  
233  
234  
235  
236  
237  
238  
239  
240  
241  
242  
243  
244  
245  
246  
247  
248  
249  
250  
251  
252  
253  
254  
255  
256  
257  
258  
259  
260  
261  
262  
263  
264  
265  
266  
267  
268  
269  
270  
271  
272  
273  
274  
275  
276  
277  
278  
279  
280  
281  
282  
283  
284  
285  
286  
287  
288  
289  
290  
291  
292  
293  
294

[Figure 2]

### 295 **Intervention products**

296 There will be 1 control product (sucrose-containing manufactured products) and 2 no  
297 added/reduced sugar reformulated products based on the same food matrix - including 2  
298 modulations of S&SE content (inclusion as individual S&SE or S&SE blends). The  
299 reformulated products have a target of  $\geq 30\%$  reduction in energy and/or sugar to achieve the  
300 status of 'reduced sugar' by EU regulation No 1047/2012. This will not be possible in all  
301 products, therefore 'no added sugar' will be applied to products who do not meet the criteria

302 (biscuits and cakes). The control products will range from 305-360 kcal (1286-1516 kJ),  
 303 while the intervention products will range from 242-326 kcal (1013-1368 kJ) (full product  
 304 nutritional information in **Supplemental Material 2**). Intervention and control products will  
 305 be matched for sweetness intensity, flavour and physical appearance.

306

307 The 2 individual S&SEs selected based on published literature were Neotame and Stevia  
 308 Rebaudioside M (in the biscuits and cakes) and 2 further S&SE blends were  
 309 Sucralose/Acesulfame K blend and Mogroside V/Stevia Rebaudioside M blend (in yoghurt,  
 310 chocolate and cereal), selected based on the results of a preliminary study using a beverage  
 311 matrix (manuscript in preparation).

312

### 313 Data Collection and Outcomes

314 Table 1 Details at which time point(s) data are collected at the CID.

315

316 **Table 1:** Data Collection and Timepoints for each CID

|                              |                                                                                               | Baseline<br>or 0' (fasting) | 10' | 15' | 20' | 30' | 45' | 60' | 120' | 180' | Next<br>day |
|------------------------------|-----------------------------------------------------------------------------------------------|-----------------------------|-----|-----|-----|-----|-----|-----|------|------|-------------|
| <b>Primary endpoint</b>      | Subjective appetite (VAS for hunger, desire to eat, fullness, prospective food consumption)   | X                           | X   |     | X   | X   | X   | X   | X    | X    |             |
| <b>Behavioural endpoints</b> | Food preference & reward (LFPQ)                                                               | X                           |     |     | X   |     |     |     |      |      |             |
|                              | Food cravings (CoEQ)                                                                          | X                           |     |     |     |     |     |     |      |      |             |
|                              | Energy intake (24-hour dietary recall)                                                        |                             |     |     |     |     |     |     |      |      | X           |
|                              | Expected satiety                                                                              | X (1 bite)                  |     |     |     |     |     |     |      |      |             |
|                              | Sensory-specific satiety                                                                      | X (1 bite)                  | X   |     |     |     |     |     |      |      |             |
|                              | Other appetite ratings (e.g., thirst, nausea, bloating, appetite for something sweet/savoury) | X                           | X   |     | X   |     | X   | X   | X    | X    |             |
| <b>Metabolic endpoints</b>   | Glucose and insulin                                                                           | X                           | X   | X   |     | X   |     | X   | X    |      |             |
|                              | Pancreatic polypeptide (PP)*                                                                  | X                           | X   | X   |     | X   |     |     |      |      |             |
|                              | GLP-1 and ghrelin                                                                             | X                           |     |     |     | X   |     | X   |      |      |             |
|                              | Lipaemia (triglycerides, total cholesterol, HDL-cholesterol, and LDL-cholesterol)             | X                           |     |     |     | X   |     | X   | X    |      |             |
| <b>Health endpoints</b>      | Liver function (ALT, AST, GGT, FL index, TyG index)                                           | X                           |     |     |     |     |     |     | X    |      |             |
|                              | HbA1c                                                                                         | CID1 & 6                    |     |     |     |     |     |     |      |      |             |
|                              | 24-hour GI side effects (self-report)                                                         |                             |     |     |     |     |     |     |      |      | X           |

317 \* Timepoints for PP are earlier for yoghurt study

318 *Abbreviations:* ALT - alanine transaminase, AST – aspartate transaminase, GGT - gamma-  
 319 glutamyltransferase, FL index - fatty liver index, TyG index - triglycerides and glucose index  
 320 VAS - visual analogue scale, LFPQ - Leeds Food Preference Questionnaire, CoEQ - Control

1  
2  
3 321 of Eating questionnaire, GLP-1- Glucagon-like peptide 1, HDL - High density lipoprotein,  
4 322 LDL - Low density lipoprotein, HbA1c - Haemoglobin A1c, GI - Gastrointestinal, CID -  
5  
6 323 Clinical Investigation Day.  
7

8 324  
9

### 10 325 **Primary Outcome**

11 326 This trial has one primary outcome which is the iAUC for the 180-minute composite appetite  
12 327 score based on hunger, fullness (reverse scored), desire to eat and prospective food  
13  
14 328 consumption (37). These subjective appetite ratings will be measured throughout the CIDs  
15 329 using VAS on the QDP. The trapezoid method will be used for the calculation of iAUC (26).  
16  
17  
18

19 330

### 20 331 **Secondary Outcomes**

#### 21 332 ***Food preference and reward***

22 333 Food preference and food reward will be measured at all CIDs using the LFPQ (33). Changes  
23  
24 334 will be determined by comparing the relative preference/food choice, explicit liking and  
25  
26 335 implicit wanting for high-fat sweet, low-fat sweet, high-fat savoury and low-fat savoury  
27  
28 336 foods, and fat/sweet appeal bias scores in the fed and hungry states between the reformulated  
29  
30 337 and control products.  
31

32 338

#### 33 339 ***Food cravings***

34 340 Food cravings will be determined at all CIDs by craving control, craving for sweet and  
35  
36 341 savoury scores from the CoEQ (30), which is a 21-item questionnaire with responses  
37  
38 342 recorded on a 100-point VAS (1 item allows for text response).  
39  
40 343

41 344

#### 42 345 ***Energy intake***

43 346 Energy intake will be measured by a 24-hour dietary recall (using the multiple pass method  
44  
45 347 (38)), which will be conducted by a trained dietitian or research staff over the telephone.

46  
47 348 Participants will be asked to recall all food and drink consumed during the 24-hour period  
48  
49 349 since leaving the laboratory. Participants will receive training on reporting food portions  
50  
51 350 using the Australian Health Survey Food Model Booklet (39) or similar culturally adapted  
52  
53 351 resources.

54  
55 352 Compensatory eating behaviour will be determined from the analysis of the 24-hour dietary  
56  
57 353 interview data using energy intakes calculated with national nutritional software. The following  
58  
59 354 variables will be considered: 1) Energy and macronutrient distribution and 2) Percent energy  
60

1  
2  
3 354 compensation (%EC), defined as the adjustment of energy intake (EI) provoked by the  
4 intervention products (40), (see **Supplemental Material 3** for further information).  
5  
6  
7 356

8 357 ***Expected satiety and sensory specific satiety***

9  
10 358 Expected satiety will be measured by the Expected Satiety (ESAT) questionnaire (34, 41) and  
11 sensory specific satiety will be measured by the Sensory-Specific Satiety (SSS) questionnaire  
12 (35) after one bite and full consumption (10') of the product. Responses to both  
13  
14 360 questionnaires are recorded on a 100-point VAS completed on the QDP. ESAT and SSS will  
15 361 be recorded on all CIDs (see **Supplemental Material 4** for details of each VAS).  
16  
17 362  
18  
19 363

20 364 ***Other behavioural ratings***

21  
22 365 Subjective ratings of thirst, nausea, bloating, appetite for sweet and appetite for savoury will  
23 be recorded using 100-point VAS on the QDP regularly throughout the CIDs (Table 1).  
24  
25 366  
26 367

27 368 ***Biochemical measures***

28  
29 369 Blood for plasma analyses will be centrifuged at 1500 g at 4°C for 10 minutes immediately  
30 after being collected. Blood for serum analyses will be left to clot for 30-60 minutes before  
31 being centrifuged. Whole blood samples for DNA and HbA1c will be frozen immediately  
32 after collection. Plasma and serum aliquots will be stored at -80°C until shipment for  
33 analyses to Bioatriki Laboratories (central lab) in Athens, Greece.  
34  
35 373 Insulin concentrations will be determined by chemiluminescent microparticle immunoassay  
36 (CMIA) (Abbott Laboratories) using an Abbott Alinity i automated immunoassay system.  
37  
38 374 Ghrelin, GLP-1 and PP concentrations will be determined by ELISA, using an open  
39 automated ELISA system. Haemoglobin A1c will be determined by enzymatic assay  
40 (Abbott) which consists of two separate concentration measurements: glycated haemoglobin  
41 (HbA1c) and total haemoglobin. The two concentrations are used to determine the percent  
42 HbA1c (NGSP units) or the haemoglobin fraction in mmol/mol (IFCC units). Triglycerides  
43 will be determined by glycerol phosphate oxidase method (Abbott). Total cholesterol will be  
44 determined by enzymatic (oxidase, esterase and peroxidase) analysis (Abbott). Glucose  
45 concentrations will be determined by enzymatic (Hexokinase/G-6-PDH) (Abbott). HDL-  
46 cholesterol will be determined by an accelerator selective detergent method (Ultra HDL  
47 assay, Abbott) and LDL-cholesterol by a selective resolution of LDL-Particles under dye  
48 formation method (Direct LDL assay, Abbott). AST and ALT will be determined by  
49 enzymatic (NADH (without P-5'-P)) assays and GGT by enzymatic, L-Gamma glutamyl-3-  
50  
51 387

1  
2  
3 388 carboxy-4-nitroanilide substrate (Abbott). All biochemistry parameters will be analysed by an  
4  
5 389 Abbott Alinity c analyser. Fatty liver index and triglyceride glucose index will be calculated  
6  
7 390 according to information provided in **Supplemental Material 5**.

8  
9 391

### 10 392 *Gastrointestinal (GI) side effects*

11 393 Any reported unusual GI side effects, including abdominal pain/cramps, heartburn, stomach  
12  
13 394 acid/reflux, nausea, vomiting, abdominal rumbling, bloating, belching, excess gas/wind,  
14  
15 395 bowel movements, stool type, etc. during the study will be recorded at the phone call the day  
16  
17 396 after each CID and each day during the at-home intervention in a booklet including the  
18  
19 397 Bristol Stool Form Scale (42). The GI symptoms check has been based on the validated  
20  
21 398 Gastrointestinal Symptoms Rating Scale (GSRS) tool (43).

22  
23 399

### 24 400 **STATISTICAL ANALYSIS PLAN**

25  
26 401 Per protocol analysis will include participants that completed all 6 CIDs and had a level of  
27  
28 402 adherence to the product consumption >80%. The main evaluations for this trial will be to  
29  
30 403 investigate differences between the intervention products (2 no added/reduced sugar  
31  
32 404 reformulated S&SE products and 1 sucrose-sweetened control). Where this is not appropriate  
33  
34 405 for some of the secondary outcomes, descriptive analyses will be used to interpret  
35  
36 406 differences. Data will be pooled across the split-site (Leeds and Lyon) study using the biscuit  
37  
38 407 matrix. Data will be presented as means and standard deviation. Outcome variables will be  
39  
40 408 checked for normality and transformed where necessary. To account for any missing data,  
41  
42 409 analyses will be conducted using linear mixed models. Models will compare S&SE product  
43  
44 410 conditions vs. sucrose control in a 3 (S&SE1, S&SE2, sucrose control) x 2 (exposure day 1  
45  
46 411 and exposure day 14) within-subject design. Model parameters will be adjusted to obtain the  
47  
48 412 best model fit. Adjustments for covariates (e.g. age, gender, BMI, intervention site,  
49  
50 413 compliance, protocol deviations, adverse events and concomitant medication) will be applied  
51  
52 414 as necessary, e.g. in the event that they influence outcomes. Analyses will be reported as both  
53  
54 415 unadjusted and adjusted models. The American Statistical Association's policy statement on  
55  
56 416 p-values (44) advises that all p-values from specified statistical models be reported along  
57  
58 417 with point estimates, effect size and confidence intervals to help interpret the compatibility of  
59  
60 418 the data with the study outcomes, therefore this procedure will be followed. Otherwise, the  
419  
420 419 level of significance will be set at 0.05.

1  
2  
3 421 ***Safety analysis***  
4

5 422 Information relating to adverse events (including events relating to GI side effects) and  
6 423 concomitant medication will be tabulated and summarised descriptively.  
7  
8

9 424

10  
11 425 **ETHICS AND MONITORING**  
12

13 426 Each intervention site has obtained ethical approval from their local ethical committee. The  
14 427 following details the specific ethical committees and the reference numbers. University of  
15 428 Leeds School of Psychology (PSC-127, approved 19th November 2020), Comité de  
16 429 Protection des Personnes Nord-Ouest III (2021-42, approved 28<sup>th</sup> March 2022), Comité de  
17 430 Ética de la Investigación de la Universidad de Navarra (2021.205, approved 7<sup>th</sup> March 2022),  
18 431 The Ethical Committee, Region H. Denmark (application number H-21078447, submitted  
19 432 and have made comments back to review committee, final decision is imminent) and  
20 433 University of Liverpool Central University Research Ethics Committee D (10659, approved  
21 434 14<sup>th</sup> April 2022). All study procedures will be conducted in accordance with the Helsinki  
22 435 Declaration and the study protocol has been registered in a public database (clinicaltrials.gov  
23 436 NTC04633681; **Supplemental Material 6**). To the extent relevant and reasonable  
24 437 International Council for Harmonisation Good Clinical Practice (ICH-GCP) guidelines will  
25 438 be used, and standard operating procedures (SOP) will be developed to facilitate the same  
26 439 performance and compliance with the protocol in each centre. All personal data is handled  
27 440 confidentially and stored in accordance with applicable law, GDPR and local laws (see  
28 441 **Supplemental Material 7**). All participants will receive written and oral information about  
29 442 the study and only trained study personnel will provide information, monitor and attest  
30 443 signing of the informed consent form. Where required, monitoring of intervention sites will  
31 444 be performed during the study by the University of Navarra depending on local regulations.  
32  
33  
34  
35  
36  
37  
38  
39  
40  
41  
42  
43  
44  
45

46 445

47 446 **TRIAL STATUS**  
48

49 447 The COVID pandemic had a large impact on access to infrastructure and services across all  
50 448 intervention centres. For example, research was halted in some institutions or fewer  
51 449 participants could be scheduled per visit (restrictions related to distance and number of social  
52 450 contacts), recruitment of new staff was frozen, new risk assessments were required, ethical  
53 451 review processes were restricted or extremely prolonged because COVID-related protocols  
54 452 were prioritized, procurement of supplies, consumables and services was suspended, and IT  
55 453 and administrative support was restricted. Further, face-to-face clinical work was put under  
56  
57  
58  
59  
60



1  
2  
3 454 strain. There were also challenges regarding staff and volunteer sickness plus overall  
4  
5 455 volunteer reluctance to engage in clinical trials affecting the speed of recruitment and testing.  
6  
7 456 Nevertheless, recruitment opened in May 2021 for the trial at the Leeds and Lyon intervention  
8  
9 457 centres using the biscuit matrix, with last participant last visit completed in June 2022 for Leeds  
10  
11 458 and expected by October 2022 for Lyon. Recruitment for the trial at Lyon using the cake matrix  
12  
13 459 opened in February 2022. The trials at Liverpool and Pamplona started recruiting in Spring  
14  
15 460 2022, and Copenhagen are still awaiting ethical approval (August 2022).  
16

461

## 462 **PUBLICATION**

17  
18  
19 463 After completion of the study, the findings will be submitted for publication in an  
20  
21 464 international peer-reviewed scientific open access journal and other relevant media. Research  
22  
23 465 data from the trial will be deposited in an open access online research data archive (for  
24  
25 466 example Zenodo).

467

## 468 **FUNDING STATEMENT**

26  
27  
28  
29 469 The present study is funded by the Horizon 2020 program: Sweeteners and sweetness  
30  
31 470 enhancers: Impact on health, obesity, safety and sustainability (acronym: SWEET, grant no:  
32  
33 471 774293). The current study was initiated by Prof. G. Finlayson as part of the Work Package 2  
34  
35 472 of the SWEET project. The study receives funding from the Horizon2020 program (9 million  
36  
37 473 Euros) to cover salary for project personnel, supplies, remuneration and dissemination of  
38  
39 474 results. The amount is deposited in a project account subject to public revision. The funder  
40  
41 475 has no role in the study design, interpretation of data or publication of material.

476

## 477 **COMPETING INTERESTS STATEMENT**

42  
43  
44 478 JCGH, JAH and CAH and are in receipt of research funding from the American Beverage  
45  
46 479 Association. CAH has received honoraria from the International Sweeteners Association.  
47  
48 480 ARA has received honoraria from Unilever and the International Sweeteners Association.  
49  
50 481 CH's research centre provides consultancy to and has received travel funds to present  
51  
52 482 research results from organisations supported by food and drink companies. CS is a paid  
53  
54 483 employee of Cargill, Inc.

## 55 56 484 **AUTHORS' CONTRIBUTIONS**

57  
58  
59 485  
60

1  
2  
3 486 The SWEET EU-project was initiated by JH, JCGH and AR. The protocol for the present  
4  
5 487 SWEET work package intervention trial was written by CG, CHa, EA-R, SN-C, CHo, J-AN,  
6  
7 488 JAM, CS, EB, EF, HM, KB and GF, with all contributing to the design of the trial along with  
8  
9 489 BO'H, DO'C, MW, MA, MN, CR. JAM, GF, J-AN, AR and CHa are principal investigators  
10  
11 490 (PI) at the 5 intervention sites. CG and BO'H drafted the manuscript and EA-R, SN-C, MW,  
12  
13 491 CS, LK, AR, KB and GF critically reviewed the manuscript. All authors read and approved  
14  
15 492 the final manuscript. Responsible author is CG.

## 493 REFERENCES

- 17 494 1. Mitchell NS, Catenacci VA, Wyatt HR, Hill JO. Obesity: overview of an epidemic.  
18  
19 495 *Psychiatr Clin North Am.* 2011;34(4):717-32.
- 20  
21 496 2. Organisation WH. Guideline: Sugars intake for adults and children. Geneva: World  
22  
23 497 Health Organisation; 2015.
- 24 498 3. San-Cristobal R, Navas-Carretero S, Martínez-González MÁ, Ordovas JM, Martínez  
25  
26 499 JA. Contribution of macronutrients to obesity: implications for precision nutrition. *Nature*  
27  
28 500 *Reviews Endocrinology.* 2020;16(6):305-20.
- 29 501 4. Anguah KO, Syed-Abdul MM, Hu Q, Jacome-Sosa M, Heimowitz C, Cox V, et al.  
30  
31 502 Changes in Food Cravings and Eating Behavior after a Dietary Carbohydrate Restriction  
32  
33 503 Intervention Trial. *Nutrients.* 2019;12(1).
- 34 504 5. Zellner DA, Garriga-Trillo A, Rohm E, Centeno S, Parker S. Food Liking and  
35  
36 505 Craving: A Cross-cultural Approach. *Appetite.* 1999;33(1):61-70.
- 37  
38 506 6. O'Connor D, Pang M, Castelnuovo G, Finlayson G, Blaak E, Gibbons C, et al. A  
39  
40 507 rational review on the effects of sweeteners and sweetness enhancers on appetite, food  
41  
42 508 reward and metabolic/adiposity outcomes in adults. *Food Funct.* 2021;12(2):442-65.
- 43 509 7. Hunter SR, Reister EJ, Cheon E, Mattes RD. Low Calorie Sweeteners Differ in Their  
44  
45 510 Physiological Effects in Humans. *Nutrients.* 2019;11(11):2717.
- 46 511 8. Pang MD, Goossens GH, Blaak EE. The Impact of Artificial Sweeteners on Body  
47  
48 512 Weight Control and Glucose Homeostasis. *Frontiers in nutrition.* 2021;7:598340-.
- 49  
50 513 9. Higgins KA, Mattes RD. A randomized controlled trial contrasting the effects of 4  
51  
52 514 low-calorie sweeteners and sucrose on body weight in adults with overweight or obesity. *The*  
53  
54 515 *American Journal of Clinical Nutrition.* 2019;109(5):1288-301.
- 55 516 10. Lee HY, Jack M, Poon T, Noori D, Venditti C, Hamamji S, et al. Effects of  
56  
57 517 Unsweetened Preloads and Preloads Sweetened with Caloric or Low-/No-Calorie Sweeteners  
58  
59 518 on Subsequent Energy Intakes: A Systematic Review and Meta-Analysis of Controlled  
60  
61 519 Human Intervention Studies. *Adv Nutr.* 2021;12(4):1481-99.



- 1  
2  
3 520 11. Rogers PJ, Ferriday D, Irani B, Hei Hoi JK, England CY, Bajwa KK, et al. Sweet  
4 521 satiation: Acute effects of consumption of sweet drinks on appetite for and intake of sweet  
5 522 and non-sweet foods. *Appetite*. 2020;149:104631.
- 6  
7  
8 523 12. Stamatakis NS, Crooks B, Ahmed A, McLaughlin JT. Effects of the Daily  
9 524 Consumption of Stevia on Glucose Homeostasis, Body Weight, and Energy Intake: A  
10 525 Randomised Open-Label 12-Week Trial in Healthy Adults. *Nutrients*. 2020;12(10).
- 11  
12  
13 526 13. Magnuson BA, Carakostas MC, Moore NH, Poulos SP, Renwick AG. Biological fate  
14 527 of low-calorie sweeteners. *Nutr Rev*. 2016;74(11):670-89.
- 15  
16  
17 528 14. Swithers SE. Artificial sweeteners produce the counterintuitive effect of inducing  
18 529 metabolic derangements. *Trends Endocrinol Metab*. 2013;24(9):431-41.
- 19  
20  
21 530 15. McGlynn ND, Khan TA, Wang L, Zhang R, Chiavaroli L, Au-Yeung F, et al.  
22 531 Association of Low- and No-Calorie Sweetened Beverages as a Replacement for Sugar-  
23 532 Sweetened Beverages With Body Weight and Cardiometabolic Risk: A Systematic Review  
24 533 and Meta-analysis. *JAMA Network Open*. 2022;5(3):e222092-e.
- 25  
26  
27 534 16. Nunn R, Young L, Ni Mhurchu C. Prevalence and Types of Non-Nutritive  
28 535 Sweeteners in the New Zealand Food Supply, 2013 and 2019. *Nutrients*. 2021;13(9).
- 29  
30  
31 536 17. Ng SW, Colchero MA, White M. How should we evaluate sweetened beverage tax  
32 537 policies? A review of worldwide experience. *BMC Public Health*. 2021;21(1):1941.
- 33  
34  
35 538 18. Russell C, Grimes C, Baker P, Sievert K, Lawrence MA. The drivers, trends and  
36 539 dietary impacts of non-nutritive sweeteners in the food supply: a narrative review. *Nutrition*  
37 540 *Research Reviews*. 2021;34(2):185-208.
- 38  
39  
40 541 19. Webster J. Working paper on product reformulation and portion size. Brussels: EU  
41 542 Platform on diet, physical activity and health  
42 543 ; 2009.
- 43  
44  
45 544 20. Organisation WH. Sugar-sweetened beverage taxes in the WHO European Region:  
46 545 success through lessons learned and challenges faced. Copenhagen. WHO Regional Office  
47 546 for Europe Licence: CC BY-NC-SA 3.0 IGO; 2022. Contract No.: WHO/EURO:2022-4781-  
48 547 44544-6381.
- 49  
50  
51 548 21. Rogers PJ, Hogenkamp PS, de Graaf C, Higgs S, Lluch A, Ness AR, et al. Does low-  
52 549 energy sweetener consumption affect energy intake and body weight? A systematic review,  
53 550 including meta-analyses, of the evidence from human and animal studies. *International*  
54 551 *journal of obesity (2005)*. 2016;40(3):381-94.
- 55  
56  
57  
58 552 22. SPIRIT 2013 Statement: Defining Standard Protocol Items for Clinical Trials. *Annals*  
59 553 *of Internal Medicine*. 2013;158(3):200-7.

- 1  
2  
3 554 23. Kjølbæk LM, Y; Blaak, E; Martínez, J; Feskens, E; Finlayson, G; Andersen, S;  
4 555 Reppas, K; Navas-Carretero, S; Adam, T; Hodgkins, C; del Álamo, M; Moshoyiannis, H;  
5 556 Halford, J; Harrold, J; Raben, A. Protocol for a multicentre, parallel, randomised, controlled,  
6 557 trial on the effect of sweeteners and sweetness enhancers on health, obesity and safety in  
7 558 overweight adults and children. The SWEET project. *BMJ Open*. 2022; In preparation.
- 8 559 24. Almiron-Roig E, Green H, Virgili R, Aeschlimann JM, Moser M, Erkner A.  
9 560 Validation of a new hand-held electronic appetite rating system against the pen and paper  
10 561 method. *Appetite*. 2009;53(3):465-8.
- 11 562 25. Jones BK, M. G. Design and Analysis of Cross-Over Trials. 3rd Edition ed. Boca  
12 563 Raton, Florida: CRC Press; 2015.
- 13 564 26. Blundell J, De Graaf C, Hulshof T, Jebb S, Livingstone B, Lluich A, et al. Appetite  
14 565 control: Methodological aspects of the evaluation of foods. *Obesity Reviews*.  
15 566 2010;11(3):251-70.
- 16 567 27. Garner DM, Garfinkel PE. The Eating Attitudes Test: an index of the symptoms of  
17 568 anorexia nervosa. *Psychol Med*. 1979;9(2):273-9.
- 18 569 28. Masic U, Harrold JA, Christiansen P, Cuthbertson DJ, Hardman CA, Robinson E, et  
19 570 al. EffectS of non-nutritive sWeetened beverages on appetITe during aCtive weigHt loss  
20 571 (SWITCH): Protocol for a randomized, controlled trial assessing the effects of non-nutritive  
21 572 sweetened beverages compared to water during a 12-week weight loss period and a follow up  
22 573 weight maintenance period. *Contemp Clin Trials*. 2017;53:80-8.
- 23 574 29. Booth M. Assessment of physical activity: an international perspective. *Res Q Exerc*  
24 575 *Sport*. 2000;71 Suppl 2:114-20.
- 25 576 30. Dalton M, Finlayson G, Hill A, Blundell J. Preliminary validation and principal  
26 577 components analysis of the Control of Eating Questionnaire (CoEQ) for the experience of  
27 578 food craving. *European Journal of Clinical Nutrition*. 2015;69(12):1313-7.
- 28 579 31. Brunger L, Smith A, Re R, Wickham M, Philippides A, Watten P, et al. Validation of  
29 580 an iPad visual analogue rating system for assessing appetite and satiety. *Appetite*.  
30 581 2015;84:259-63.
- 31 582 32. Gibbons C, Caudwell P, Finlayson G, King N, Blundell J. Validation of a new hand-  
32 583 held electronic data capture method for continuous monitoring of subjective appetite  
33 584 sensations. *Int J Behav Nutr Phys Act*. 2011;8:57.
- 34 585 33. Finlayson G, King N, Blundell J. The role of implicit wanting in relation to explicit  
35 586 liking and wanting for food: implications for appetite control. *Appetite*. 2008;50(1):120-7.

- 1  
2  
3 587 34. Forde CG, Almiron-Roig E, Brunstrom JM. Expected Satiety: Application to Weight  
4 588 Management and Understanding Energy Selection in Humans. *Current obesity reports*.  
5 589 2015;4(1):131-40.  
6  
7  
8 590 35. Snoek HM, Huntjens L, Van Gemert LJ, De Graaf C, Weenen H. Sensory-specific  
9 591 satiety in obese and normal-weight women. *Am J Clin Nutr*. 2004;80(4):823-31.  
10  
11 592 36. Lasschuijt MP, Mars M, de Graaf C, Smeets PAM. Endocrine Cephalic Phase  
12 593 Responses to Food Cues: A Systematic Review. *Adv Nutr*. 2020;11(5):1364-83.  
13  
14 594 37. Anderson GH, Catherine NL, Woodend DM, Wolever TM. Inverse association  
15 595 between the effect of carbohydrates on blood glucose and subsequent short-term food intake  
16 596 in young men. *The American Journal of Clinical Nutrition*. 2002;76(5):1023-30.  
17  
18 597 38. Steinfeldt L, Anand J, Murayi T. Food Reporting Patterns in the USDA Automated  
19 598 Multiple-Pass Method. *Procedia Food Science*. 2013;2:145-56.  
20  
21 599 39. Australian Health Survey. Food Model Booklet. In: Statistics ABo, editor. Belconnen  
22 600 ACT2010.  
23  
24 601 40. Zandstra EH, Mathey MF, Graaf C, van Staveren WA. Short-term regulation of food  
25 602 intake in children, young adults and the elderly. *Eur J Clin Nutr*. 2000;54(3):239-46.  
26  
27 603 41. Brunstrom JM, Shakeshaft NG, Scott-Samuel NE. Measuring 'expected satiety' in a  
28 604 range of common foods using a method of constant stimuli. *Appetite*. 2008;51(3):604-14.  
29  
30 605 42. O'Donnell LJ, Virjee J, Heaton KW. Detection of pseudodiarrhoea by simple clinical  
31 606 assessment of intestinal transit rate. *BMJ (Clinical research ed)*. 1990;300(6722):439-40.  
32  
33 607 43. Svedlund J, Sjödin I, Dotevall G. GSRS--a clinical rating scale for gastrointestinal  
34 608 symptoms in patients with irritable bowel syndrome and peptic ulcer disease. *Dig Dis Sci*.  
35 609 1988;33(2):129-34.  
36  
37 610 44. Wasserstein RL, Lazar NA. The ASA Statement on p-Values: Context, Process, and  
38 611 Purpose. *The American Statistician*. 2016;70(2):129-33.  
39  
40  
41  
42  
43  
44  
45  
46  
47

## 613 **FIGURE LEGENDS**

614  
615 **Figure 1:** Latin Square design and duration for cross-over trials. Each trial will include two  
616 no added/reduced sugar reformulated products and 1 sucrose-sweetened control (double-  
617 blind) per food matrix. Participant will be randomised to 1 of 6 treatment orders. For  
618 example, a participant randomised to order one will consume product A in the lab on clinical  
619 investigation day (CID) 1/exposure day (ED) 1 and then every day at home until CID2/ED14  
620 when it is consumed in the lab again. After a 2-week washout, the participant returns to the

1  
2  
3 621 lab and repeats the study block with product B, followed by another 2-week washout,  
4  
5 622 followed by the final study block with product C.  
6  
7 623

8 624 **Figure 2:** Example timeline of events during Clinical Investigation Day for biscuit matrix.  
9  
10 625 CoEQ, Control of Eating Questionnaire; ED, Exposure Day; ESAT, Expected Satiety; G.I.,  
11  
12 626 gastrointestinal; LFPQ, Leeds Food Preference Questionnaire; SSS, Sensory-Specific Satiety;  
13  
14 627 VAS, Visual Analogue Scale.  
15

16 628  
17  
18  
19  
20  
21  
22  
23  
24  
25  
26  
27  
28  
29  
30  
31  
32  
33  
34  
35  
36  
37  
38  
39  
40  
41  
42  
43  
44  
45  
46  
47  
48  
49  
50  
51  
52  
53  
54  
55  
56  
57  
58  
59  
60

For peer review only

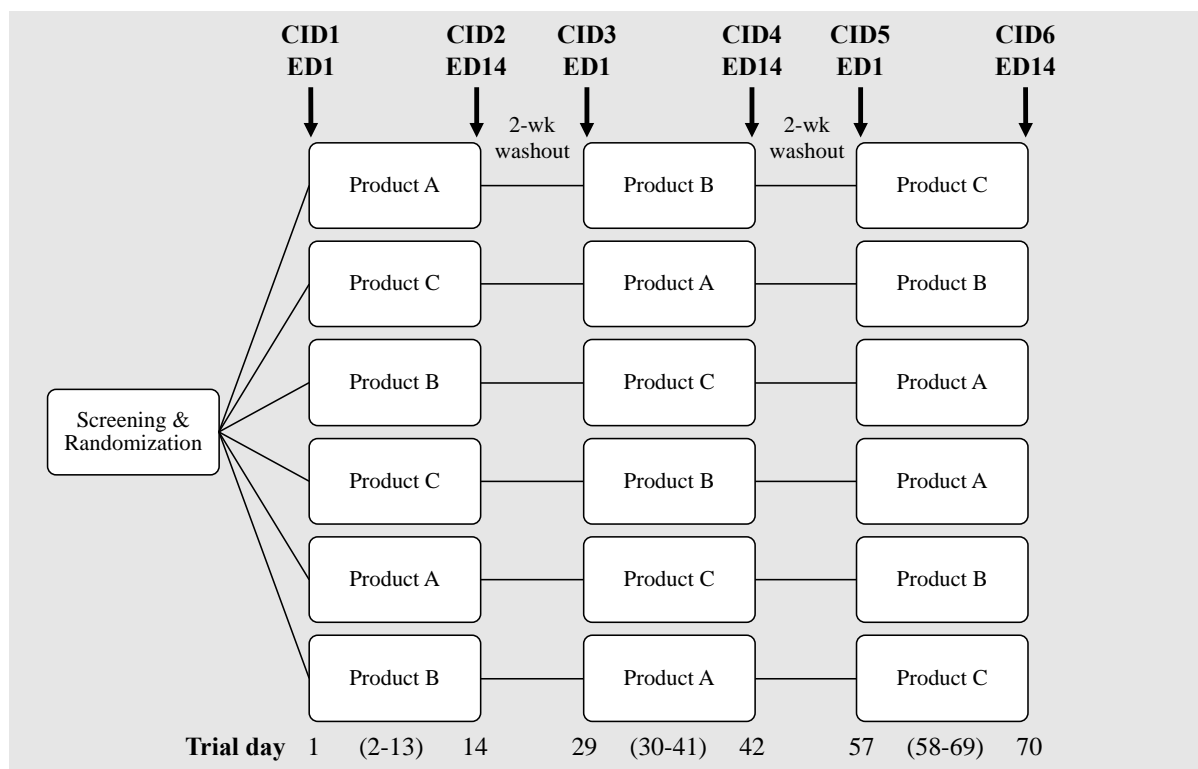

**Figure 1:** Latin Square design and duration for cross-over trials. Each trial will include two no added/reduced sugar reformulated products and 1 sucrose-sweetened control (double-blind) per food matrix. Participant will be randomised to 1 of 6 treatment orders. For example, a participant randomised to order one will consume product A in the lab on clinical investigation day (CID) 1/exposure day (ED) 1 and then every day at home until CID2/ED14 when it is consumed in the lab again. After a 2-week washout, the participant returns to the lab and repeats the study block with product B, followed by another 2-week washout, followed by the final study block with product C.

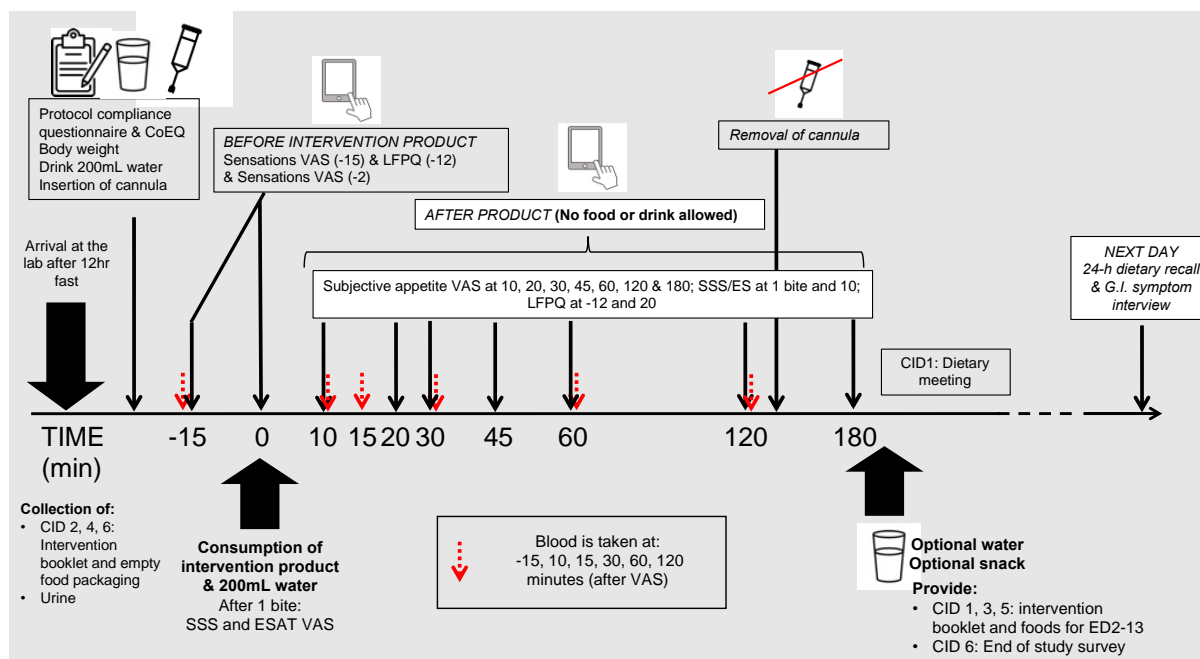

**Figure 2:** Example timeline of events during Clinical Investigation Day for biscuit matrix. CoEQ, Control of Eating Questionnaire; ED, Exposure Day; ESAT, Expected Satiety; G.I., gastrointestinal; LFPQ, Leeds Food Preference Questionnaire; SSS, Sensory-Specific Satiety; VAS, Visual Analogue Scale.

## Supplemental Material 1: Exclusion Criteria

### General Criteria

- Blood donation < 3 month prior to study or for full duration of the study.
- Food allergy, intolerance, restriction or avoidance of any of the study foods (e.g., veganism) or history of anaphylactic reaction to any food.
- Likelihood for disordered eating defined as a score  $\geq 20$  on the EAT-26 test
- Currently dieting to lose weight.
- Having lost or gained >4.5 kg in the last 3 months.
- Smoking or having quit <3 months prior to study.
- Habitually consuming >14 units/week of alcohol in women or >21 units/week in men in the last 3 months.
- Performing >10 h of intense physical activity per week in the last 3 months.
- Night or late shift work (ending later than 11 pm on a permanent basis). Rotational shift work allowed if can attend on days that do not follow a late/night shift.
- Self-reported use of drugs of abuse within the previous 12 months.
- For women: Pregnancy, lactation.
- Persons who do not have access to either (mobile) phone or internet (this is necessary when being contacted by the study personnel during the study).
- Insufficient communication in the national language.
- Proven or suspected inability, physically or mentally, to comply with the procedures required by the study protocol as evaluated by the daily study manager, site-PI, PI or clinical responsible. This includes volunteers for which insufficient collaboration may be foreseen.
- Subject's general condition contraindicates continuing in the study as evaluated by the daily study manager, site-PI, PI or responsible clinician.
- Simultaneous participation in other relevant clinical intervention studies.
- Previous university or college training related to eating behaviour research.

### Medical conditions as known by the person

- Self-reported eating disorders.
- Diagnosed anaemia.
- Diagnosed diabetes mellitus.
- Abnormal G.I. function or structure such as malformation, angiodysplasia, active peptic ulcer.
- Active inflammatory bowel disease, celiac disease, chronic pancreatitis, or other disorder potentially causing malabsorption.
- History of G.I. surgery with permanent effect (i.e., surgical treatment of obesity).
- Medical history of CVD (e.g., current angina; myocardial infarction or stroke within the past 6 months; heart failure; symptomatic peripheral vascular disease).
- Significant liver disease, e.g., cirrhosis (fatty liver disease allowed).
- Malignancy which is currently active or in remission for less than five years after last treatment (local basal and squamous cell skin cancer allowed).
- Thyroid diseases, except those on Levothyroxine treatment of hypothyroidism if the person has been on a stable dose for at least 3 months.
- Psychiatric illness (e.g., major depression, bipolar disorders).

### Medication

- 1  
2  
3 • Use currently or within the previous 3 months of prescription or over the counter  
4 medication that has the potential of affecting appetite, satiety, or body weight incl. food  
5 supplements.

6 Except: low dose antidepressants if they, in the judgement of the daily study manager, site-  
7 PI, PI or clinical responsible, do not affect weight or following the study protocol.  
8 Levothyroxine for treatment of hypothyroidism is allowed if the person has been on a stable  
9 dose for at least 3 months.

- 10 • Cholesterol lowering medication, if the dose has changed during the last 3 months (i.e.,  
11 the medication is allowed if the participant has been on a stable dose for at least 3 months).  
12  
13  
14  
15  
16  
17  
18  
19  
20  
21  
22  
23  
24  
25  
26  
27  
28  
29  
30  
31  
32  
33  
34  
35  
36  
37  
38  
39  
40  
41  
42  
43  
44  
45  
46  
47  
48  
49  
50  
51  
52  
53  
54  
55  
56  
57  
58  
59  
60

For peer review only



## Supplemental Material 2: Product Nutritional Information

Table 1: Proposed energy and nutrient composition of the intervention products

|                                    | Control  |                                                              | Reformulation |                                                              |
|------------------------------------|----------|--------------------------------------------------------------|---------------|--------------------------------------------------------------|
|                                    | Per 100g | Per portion<br>(85g/ 3 cakes)                                | Per 100g      | Per portion<br>(85g/ 3 cakes)                                |
| <b>Cake with fruit filling</b>     |          |                                                              |               |                                                              |
| Energy (kcal)                      | 391      | 332                                                          | 343           | 292                                                          |
| Energy (kJ)                        | 1638     | 1392                                                         | 1427          | 1213                                                         |
| Fats (g)                           | 16.6     | 14.1                                                         | 16.5          | 14.0                                                         |
| Sat. fats (g)                      | 1.7      | 1.4                                                          | 1.7           | 1.4                                                          |
| Carbs (g)                          | 56.8     | 48.2                                                         | 57.0          | 48.4                                                         |
| Sugars (g)                         | 28.3     | 24.1                                                         | 1.3           | 1.1                                                          |
| Polyols (g)                        | 3.7      | 3.1                                                          | 28.4          | 24.1                                                         |
| Fibre (g)                          | 1.4      | 1.2                                                          | 1.3           | 1.1                                                          |
| Proteins (g)                       | 5.7      | 4.8                                                          | 5.7           | 4.8                                                          |
| Salt (mg)                          | 0.4      | 0.3                                                          | 0.4           | 0.3                                                          |
| <b>Biscuit</b>                     | Per 100g | Per portion<br>(3 biscuits)                                  | Per 100g      | Per portion<br>(3 biscuits)                                  |
| Energy (kcal)                      | 423      | 360                                                          | 384           | 326                                                          |
| Energy (kJ)                        | 1783     | 1516                                                         | 1609          | 1368                                                         |
| Fats (g)                           | 11.2     | 9.5                                                          | 11.5          | 9.8                                                          |
| Sat. fats (g)                      | 7.11     | 6.0                                                          | 7.33          | 6.2                                                          |
| Carbs (g)                          | 75.9     | 64.5                                                         | 76.2          | 64.8                                                         |
| Sugars (g)                         | 24.7     | 21.0                                                         | 1.8           | 1.5                                                          |
| Polyols (g)                        | 3.7      | 3.1                                                          | 22.7          | 19.3                                                         |
| Fibre (g)                          | 0.7      | 0.6                                                          | 2.4           | 2.0                                                          |
| Proteins (g)                       | 6.5      | 5.5                                                          | 6.6           | 5.6                                                          |
| Salt (mg)                          | 0.7      | 0.6                                                          | 0.7           | 0.6                                                          |
| <b>Creamy yoghurt</b>              | Per 100g | Per portion<br>(135g 1 serving)                              | Per 100g      | Per portion<br>(135g 1 serving)                              |
| Energy (kcal)                      | 226      | 305                                                          | 180           | 242                                                          |
| Energy (kJ)                        | 943      | 1286                                                         | 750           | 1013                                                         |
| Fats (g)                           | 18.5     | 25.0                                                         | 16.3          | 22.0                                                         |
| Sat. fats (g)                      | 8.3      | 18.7                                                         | 8.3           | 18.7                                                         |
| Carbs (g)                          | 8.12     | 10.96                                                        | 1.71          | 2.31                                                         |
| Sugars (g)                         | 8.12     | 10.96                                                        | 1.71          | 2.31                                                         |
| Polyols (g)                        | 0.00     | 0.00                                                         | 0.00          | 0.00                                                         |
| Fibre (g)                          | 0.00     | 0.00                                                         | 0.00          | 0.00                                                         |
| Proteins (g)                       | 6.50     | 8.78                                                         | 6.50          | 8.78                                                         |
| Salt (mg)                          | 0.14     | 0.32                                                         | 0.14          | 0.32                                                         |
| <b>Chocolate</b>                   | Per 100g | Per portion<br>(60g 1 bar)                                   | Per 100g      | Per portion<br>(60g 1 bar)                                   |
| Energy (kcal)                      | 500      | 325                                                          | 477           | 310                                                          |
| Energy (kJ)                        | 2098     | 1364                                                         | 2004          | 1303                                                         |
| Fats (g)                           | 31       | 20                                                           | 31            | 20                                                           |
| Sat. fats (g)                      | 18       | 12                                                           | 18            | 12                                                           |
| Carbs (g)                          | 46       | 30                                                           | 46            | 30                                                           |
| Sugars (g)                         | 45       | 29                                                           | 31            | 20                                                           |
| Polyols (g)                        | 0        | 0                                                            | 12            | 8                                                            |
| Fibre (g)                          | 8        | 5                                                            | 8             | 5                                                            |
| Proteins (g)                       | 5        | 3                                                            | 5             | 3                                                            |
| Salt (mg)                          | 5        | 3                                                            | 8             | 5                                                            |
| <b>Honey ball breakfast cereal</b> | Per 100g | Per portion<br>(60 g of cereals + 125 ml<br>(121 g) of milk) | Per 100g      | Per portion<br>(60 g of cereals + 125 ml<br>(121 g) of milk) |
| Energy (kcal)                      | 173      | 320                                                          | 153           | 283                                                          |
| Energy (kJ)                        | 731.2    | 1353.8                                                       | 641.7         | 1187.2                                                       |
| Fats (g)                           | 3.26     | 6.03                                                         | 3.16          | 5.84                                                         |
| Sat. fats (g)                      | 1.64     | 3.04                                                         | 1.63          | 3.01                                                         |
| Carbs (g)                          | 31.17    | 57.66                                                        | 25.59         | 47.33                                                        |

|    |              |       |       |      |       |
|----|--------------|-------|-------|------|-------|
| 1  |              |       |       |      |       |
| 2  |              |       |       |      |       |
| 3  | Sugars (g)   | 12.03 | 22.26 | 5.02 | 9.28  |
| 4  | Polyols (g)  | 0     | 0     | 4.86 | 9.00  |
| 5  | Fibre (g)    | 0.86  | 1.60  | 6.64 | 12.28 |
| 6  | Proteins (g) | 4.38  | 8.11  | 4.21 | 7.79  |
| 7  | Salt (mg)    | 0.35  | 0.64  | 0.33 | 0.60  |
| 8  |              |       |       |      |       |
| 9  |              |       |       |      |       |
| 10 |              |       |       |      |       |
| 11 |              |       |       |      |       |
| 12 |              |       |       |      |       |
| 13 |              |       |       |      |       |
| 14 |              |       |       |      |       |
| 15 |              |       |       |      |       |
| 16 |              |       |       |      |       |
| 17 |              |       |       |      |       |
| 18 |              |       |       |      |       |
| 19 |              |       |       |      |       |
| 20 |              |       |       |      |       |
| 21 |              |       |       |      |       |
| 22 |              |       |       |      |       |
| 23 |              |       |       |      |       |
| 24 |              |       |       |      |       |
| 25 |              |       |       |      |       |
| 26 |              |       |       |      |       |
| 27 |              |       |       |      |       |
| 28 |              |       |       |      |       |
| 29 |              |       |       |      |       |
| 30 |              |       |       |      |       |
| 31 |              |       |       |      |       |
| 32 |              |       |       |      |       |
| 33 |              |       |       |      |       |
| 34 |              |       |       |      |       |
| 35 |              |       |       |      |       |
| 36 |              |       |       |      |       |
| 37 |              |       |       |      |       |
| 38 |              |       |       |      |       |
| 39 |              |       |       |      |       |
| 40 |              |       |       |      |       |
| 41 |              |       |       |      |       |
| 42 |              |       |       |      |       |
| 43 |              |       |       |      |       |
| 44 |              |       |       |      |       |
| 45 |              |       |       |      |       |
| 46 |              |       |       |      |       |
| 47 |              |       |       |      |       |
| 48 |              |       |       |      |       |
| 49 |              |       |       |      |       |
| 50 |              |       |       |      |       |
| 51 |              |       |       |      |       |
| 52 |              |       |       |      |       |
| 53 |              |       |       |      |       |
| 54 |              |       |       |      |       |
| 55 |              |       |       |      |       |
| 56 |              |       |       |      |       |
| 57 |              |       |       |      |       |
| 58 |              |       |       |      |       |
| 59 |              |       |       |      |       |
| 60 |              |       |       |      |       |

For peer review only

### Supplementary Material 3 – Energy Intake Calculation

Percent energy compensation (%EC) was derived from the dietary recall data as previously reported by Zandstra et al.<sup>1</sup>, and Almiron-Roig et al.<sup>2</sup>. Briefly, %EC was calculated as:

$$\%EC = [ (EI_{\text{Control Product}} - EI_{\text{Reformulated Product}}) / |EP| ] * 100$$

where EI represents the cumulative energy intake 24-h post consumption under the control product or under the reformulated product conditions, excluding the energy of the product itself. EP (as an absolute value) represents the difference in energy between the full-energy-containing preload (i.e., control product) and the lower-energy-containing preload (i.e., reformulated products). For example, if the control product has a value of 325 kcal and the reformulated product has a value of 250 kcal, then EP=325-250 or 75 kcal).

1. Zandstra, E. H., Mathey, M. F., Graaf, C., & van Staveren, W. A. (2000). Short-term regulation of food intake in children, young adults and the elderly. *European Journal of Clinical Nutrition*, 54(3), 239-246. <http://www.ncbi.nlm.nih.gov/pubmed/10713747>
2. Almiron-Roig, E., Palla, L., Guest, K., Ricchiutu, C., Vint, N., Jebb, S. A., & Drewnowski, A. (2013). Factors that determine energy compensation: a systematic review of preload studies. *Nutrition Reviews*, 71(7), 458-473. <https://doi.org/10.1111/nure.12048>

1  
2  
3 **Supplemental Material 4: Questions used to assess product taste text, subjective**  
4 **appetite sensations, sensory specific satiety and expected satiety**  
5  
6  
7

8 **Food Taste Test (FTT) (Conducted at screening)**  
9

10  
11 **Screen 1**  
12

13 You will now be presented with a food that we will ask you to evaluate. Please follow the  
14 instructions as they appear on the screen.  
15  
16  
17  
18  
19  
20

21 -----  
22 **Screen 2**  
23

- 24  
25 1. Take a mouthful of the food provided.  
26 2. Chew while counting to 5.  
27 3. Swallow.  
28 4. Answer the question by moving the arrow to the left or to the right.  
29  
30

31 **How pleasant was this food?**  
32 Not at all pleasant Extremely  
33 pleasant  
34  
35  
36  
37  
38  
39

40 -----  
41 **Screen 3**  
42

43 Thank you. This is the end of the taste test.  
44

45 Please call the investigator after submitting your answer.  
46  
47  
48  
49  
50  
51  
52  
53  
54  
55  
56  
57  
58  
59  
60

### **Subjective Appetite Questions (used during all CIDs)**

Considering how you feel **right now**, give your answer to each of the following questions by moving the arrow to the left or to the right at the point that best represents your experience. The list below is the complete list of questions used via visual analogue scales.

1. How **hungry** do you feel?
  2. How **full** do you feel?
  3. How **thirsty** do you feel?
  4. How strong is your **desire to eat**?
  5. How **much** do you think you could **eat** right now?
  6. How **nauseous** do you feel?
  7. How **bloated** do you feel?
  8. How strong is your appetite for something **savoury**?
  9. How strong is your appetite for something **sweet**?
- 

### **Sensory Specific Satiety Questionnaire** (assessed after 1 bite and after consumption of product)

#### **After 1 bite:**

Please take a bite of the food and keep the food in your mouth while rating the food. Swallow the food only when your rating is complete.

How **pleasant** is the taste of the food right now?

#### **At 10 minutes:**

How **pleasant** is the taste of the food now that you have finished eating it?

### **Expected Satiety (ESAT)** (assessed after 1 bite and after consumption of product)<sup>1</sup>

#### **After 1 bite:**

After having taken 1 bite of the food and looking at the whole food portion, how much will this portion of food stop you from feeling hungry between meals?

#### **At 10 minutes after full consumption and after SSS rating:**

How much will this food stop you from feeling hungry between meals?

## Supplemental Material 5: Fatty liver index and triglyceride glucose index calculation

### Calculation of Fatty Liver Index:

Some of the blood parameters will be used to calculate a Fatty Liver index (FLI) using the formula of Bedogni et al <sup>1</sup>, with measured values for BMI, fasting TG (mg/dL), fasting GGT (U/L) and waist circumference (cm), as follows:

$$FLI = \left( e^{0.953 \cdot \log_e(\text{triglycerides}) + 0.139 \cdot \text{BMI} + 0.718 \cdot \log_e(\text{ggt}) + 0.053 \cdot \text{waist circumference} - 15.745} \right) / \left( 1 + e^{0.953 \cdot \log_e(\text{triglycerides}) + 0.139 \cdot \text{BMI} + 0.718 \cdot \log_e(\text{ggt}) + 0.053 \cdot \text{waist circumference} - 15.745} \right) * 100$$

### Calculation of Triglyceride Glucose Index:

The formula of Simental-Mendía et al.<sup>2</sup> will be measured with measured fasting TG (mg/dL) and fasting glucose (mg/dL), by dividing the Ln of the TG \*glucose product by 2:

$$\text{TyG index} = \text{Ln} [(\text{fasting triglycerides}) (\text{mg/dL}) \times \text{fasting glucose} (\text{mg/dL})] / 2$$

1. Bedogni, G., Bellentani, S., Miglioli, L., Masutti, F., Passalacqua, M., Castiglione, A., & Tiribelli, C. (2006). The fatty liver index: A simple and accurate predictor of hepatic steatosis in the general population. *BMC Gastroenterology*, 6(1), 33. <https://doi.org/10.1186/1471-230X-6-33>
2. Simental-Mendía, L. E., Rodríguez-Morán, M., & Guerrero-Romero, F. (2008). The product of fasting glucose and triglycerides as surrogate for identifying insulin resistance in apparently healthy subjects. *Metabolic Syndrome and Related Disorders*, 6(4), 299–304. <https://doi.org/10.1089/met.2008.0034>

**Protocol for acute and repeated dose impact of sweeteners and sweetness enhancers on appetite-related behaviour, physiology, and health: a multi-centre, double-blind, cross-over, randomised, controlled trial in people with overweight/obesity. The SWEET project.**

**Supplemental Material 6: Trial Registration Data Set**

| Trial registration data                       |                                                                                                                                                                                                                                                                                                                                                                                                                                                                                                                                                                                                                                                                                                                                                                                                                                                                                                                                                                                                                                                                                                                                                                                                                                                                                                                                                                                                                                                                                                                                                                                                                                                                                                                                                                                                                                                                                                                                                                                                                                                                                                                                                                                                                                                                                                                                                                                                                                                                                                                                                                                                                                                                                                                                                                                                                                                                                                                                                                                                                                                                                                                                                                                                                                                                                                                                                                                                                                                                                                                                                                                                                                                                                                                                                                                                                                                                                                                                                                                                                                                                                                                                                                                                                                                                                                                              |
|-----------------------------------------------|------------------------------------------------------------------------------------------------------------------------------------------------------------------------------------------------------------------------------------------------------------------------------------------------------------------------------------------------------------------------------------------------------------------------------------------------------------------------------------------------------------------------------------------------------------------------------------------------------------------------------------------------------------------------------------------------------------------------------------------------------------------------------------------------------------------------------------------------------------------------------------------------------------------------------------------------------------------------------------------------------------------------------------------------------------------------------------------------------------------------------------------------------------------------------------------------------------------------------------------------------------------------------------------------------------------------------------------------------------------------------------------------------------------------------------------------------------------------------------------------------------------------------------------------------------------------------------------------------------------------------------------------------------------------------------------------------------------------------------------------------------------------------------------------------------------------------------------------------------------------------------------------------------------------------------------------------------------------------------------------------------------------------------------------------------------------------------------------------------------------------------------------------------------------------------------------------------------------------------------------------------------------------------------------------------------------------------------------------------------------------------------------------------------------------------------------------------------------------------------------------------------------------------------------------------------------------------------------------------------------------------------------------------------------------------------------------------------------------------------------------------------------------------------------------------------------------------------------------------------------------------------------------------------------------------------------------------------------------------------------------------------------------------------------------------------------------------------------------------------------------------------------------------------------------------------------------------------------------------------------------------------------------------------------------------------------------------------------------------------------------------------------------------------------------------------------------------------------------------------------------------------------------------------------------------------------------------------------------------------------------------------------------------------------------------------------------------------------------------------------------------------------------------------------------------------------------------------------------------------------------------------------------------------------------------------------------------------------------------------------------------------------------------------------------------------------------------------------------------------------------------------------------------------------------------------------------------------------------------------------------------------------------------------------------------------------------|
| Data category                                 | Information                                                                                                                                                                                                                                                                                                                                                                                                                                                                                                                                                                                                                                                                                                                                                                                                                                                                                                                                                                                                                                                                                                                                                                                                                                                                                                                                                                                                                                                                                                                                                                                                                                                                                                                                                                                                                                                                                                                                                                                                                                                                                                                                                                                                                                                                                                                                                                                                                                                                                                                                                                                                                                                                                                                                                                                                                                                                                                                                                                                                                                                                                                                                                                                                                                                                                                                                                                                                                                                                                                                                                                                                                                                                                                                                                                                                                                                                                                                                                                                                                                                                                                                                                                                                                                                                                                                  |
| Primary registry and trial identifying number | ClinicalTrials.gov NCT04633681                                                                                                                                                                                                                                                                                                                                                                                                                                                                                                                                                                                                                                                                                                                                                                                                                                                                                                                                                                                                                                                                                                                                                                                                                                                                                                                                                                                                                                                                                                                                                                                                                                                                                                                                                                                                                                                                                                                                                                                                                                                                                                                                                                                                                                                                                                                                                                                                                                                                                                                                                                                                                                                                                                                                                                                                                                                                                                                                                                                                                                                                                                                                                                                                                                                                                                                                                                                                                                                                                                                                                                                                                                                                                                                                                                                                                                                                                                                                                                                                                                                                                                                                                                                                                                                                                               |
| Date of registration in primary registry      | November 2021                                                                                                                                                                                                                                                                                                                                                                                                                                                                                                                                                                                                                                                                                                                                                                                                                                                                                                                                                                                                                                                                                                                                                                                                                                                                                                                                                                                                                                                                                                                                                                                                                                                                                                                                                                                                                                                                                                                                                                                                                                                                                                                                                                                                                                                                                                                                                                                                                                                                                                                                                                                                                                                                                                                                                                                                                                                                                                                                                                                                                                                                                                                                                                                                                                                                                                                                                                                                                                                                                                                                                                                                                                                                                                                                                                                                                                                                                                                                                                                                                                                                                                                                                                                                                                                                                                                |
| Secondary identifying numbers                 | N/A                                                                                                                                                                                                                                                                                                                                                                                                                                                                                                                                                                                                                                                                                                                                                                                                                                                                                                                                                                                                                                                                                                                                                                                                                                                                                                                                                                                                                                                                                                                                                                                                                                                                                                                                                                                                                                                                                                                                                                                                                                                                                                                                                                                                                                                                                                                                                                                                                                                                                                                                                                                                                                                                                                                                                                                                                                                                                                                                                                                                                                                                                                                                                                                                                                                                                                                                                                                                                                                                                                                                                                                                                                                                                                                                                                                                                                                                                                                                                                                                                                                                                                                                                                                                                                                                                                                          |
| Source(s) of monetary or material support     | European Union Horizon 2020 Program                                                                                                                                                                                                                                                                                                                                                                                                                                                                                                                                                                                                                                                                                                                                                                                                                                                                                                                                                                                                                                                                                                                                                                                                                                                                                                                                                                                                                                                                                                                                                                                                                                                                                                                                                                                                                                                                                                                                                                                                                                                                                                                                                                                                                                                                                                                                                                                                                                                                                                                                                                                                                                                                                                                                                                                                                                                                                                                                                                                                                                                                                                                                                                                                                                                                                                                                                                                                                                                                                                                                                                                                                                                                                                                                                                                                                                                                                                                                                                                                                                                                                                                                                                                                                                                                                          |
| Primary sponsor                               | European Union Horizon 2020 Program                                                                                                                                                                                                                                                                                                                                                                                                                                                                                                                                                                                                                                                                                                                                                                                                                                                                                                                                                                                                                                                                                                                                                                                                                                                                                                                                                                                                                                                                                                                                                                                                                                                                                                                                                                                                                                                                                                                                                                                                                                                                                                                                                                                                                                                                                                                                                                                                                                                                                                                                                                                                                                                                                                                                                                                                                                                                                                                                                                                                                                                                                                                                                                                                                                                                                                                                                                                                                                                                                                                                                                                                                                                                                                                                                                                                                                                                                                                                                                                                                                                                                                                                                                                                                                                                                          |
| Secondary sponsor(s)                          | N/A                                                                                                                                                                                                                                                                                                                                                                                                                                                                                                                                                                                                                                                                                                                                                                                                                                                                                                                                                                                                                                                                                                                                                                                                                                                                                                                                                                                                                                                                                                                                                                                                                                                                                                                                                                                                                                                                                                                                                                                                                                                                                                                                                                                                                                                                                                                                                                                                                                                                                                                                                                                                                                                                                                                                                                                                                                                                                                                                                                                                                                                                                                                                                                                                                                                                                                                                                                                                                                                                                                                                                                                                                                                                                                                                                                                                                                                                                                                                                                                                                                                                                                                                                                                                                                                                                                                          |
| Contact for public queries                    | Professor Graham Finlayson (G.S.Finlayson@leeds.ac.uk)                                                                                                                                                                                                                                                                                                                                                                                                                                                                                                                                                                                                                                                                                                                                                                                                                                                                                                                                                                                                                                                                                                                                                                                                                                                                                                                                                                                                                                                                                                                                                                                                                                                                                                                                                                                                                                                                                                                                                                                                                                                                                                                                                                                                                                                                                                                                                                                                                                                                                                                                                                                                                                                                                                                                                                                                                                                                                                                                                                                                                                                                                                                                                                                                                                                                                                                                                                                                                                                                                                                                                                                                                                                                                                                                                                                                                                                                                                                                                                                                                                                                                                                                                                                                                                                                       |
| Contact for scientific queries                | Professor Graham Finlayson (G.S.Finlayson@leeds.ac.uk)                                                                                                                                                                                                                                                                                                                                                                                                                                                                                                                                                                                                                                                                                                                                                                                                                                                                                                                                                                                                                                                                                                                                                                                                                                                                                                                                                                                                                                                                                                                                                                                                                                                                                                                                                                                                                                                                                                                                                                                                                                                                                                                                                                                                                                                                                                                                                                                                                                                                                                                                                                                                                                                                                                                                                                                                                                                                                                                                                                                                                                                                                                                                                                                                                                                                                                                                                                                                                                                                                                                                                                                                                                                                                                                                                                                                                                                                                                                                                                                                                                                                                                                                                                                                                                                                       |
| Public title                                  | Impact of Sweeteners on Behaviour, Physiology & Health ( SWEET-WP2-P2 )                                                                                                                                                                                                                                                                                                                                                                                                                                                                                                                                                                                                                                                                                                                                                                                                                                                                                                                                                                                                                                                                                                                                                                                                                                                                                                                                                                                                                                                                                                                                                                                                                                                                                                                                                                                                                                                                                                                                                                                                                                                                                                                                                                                                                                                                                                                                                                                                                                                                                                                                                                                                                                                                                                                                                                                                                                                                                                                                                                                                                                                                                                                                                                                                                                                                                                                                                                                                                                                                                                                                                                                                                                                                                                                                                                                                                                                                                                                                                                                                                                                                                                                                                                                                                                                      |
| Scientific title                              | Acute and Repeated Impact of Sweeteners and Sweetness Enhancers on Food Behaviour, Physiology & Health (SWEET Work Package 2 Phase 2)                                                                                                                                                                                                                                                                                                                                                                                                                                                                                                                                                                                                                                                                                                                                                                                                                                                                                                                                                                                                                                                                                                                                                                                                                                                                                                                                                                                                                                                                                                                                                                                                                                                                                                                                                                                                                                                                                                                                                                                                                                                                                                                                                                                                                                                                                                                                                                                                                                                                                                                                                                                                                                                                                                                                                                                                                                                                                                                                                                                                                                                                                                                                                                                                                                                                                                                                                                                                                                                                                                                                                                                                                                                                                                                                                                                                                                                                                                                                                                                                                                                                                                                                                                                        |
| Countries of recruitment                      | Denmark, France, Spain, United Kingdom                                                                                                                                                                                                                                                                                                                                                                                                                                                                                                                                                                                                                                                                                                                                                                                                                                                                                                                                                                                                                                                                                                                                                                                                                                                                                                                                                                                                                                                                                                                                                                                                                                                                                                                                                                                                                                                                                                                                                                                                                                                                                                                                                                                                                                                                                                                                                                                                                                                                                                                                                                                                                                                                                                                                                                                                                                                                                                                                                                                                                                                                                                                                                                                                                                                                                                                                                                                                                                                                                                                                                                                                                                                                                                                                                                                                                                                                                                                                                                                                                                                                                                                                                                                                                                                                                       |
| Health condition(s) or problem(s) studied     | Eating Behaviour                                                                                                                                                                                                                                                                                                                                                                                                                                                                                                                                                                                                                                                                                                                                                                                                                                                                                                                                                                                                                                                                                                                                                                                                                                                                                                                                                                                                                                                                                                                                                                                                                                                                                                                                                                                                                                                                                                                                                                                                                                                                                                                                                                                                                                                                                                                                                                                                                                                                                                                                                                                                                                                                                                                                                                                                                                                                                                                                                                                                                                                                                                                                                                                                                                                                                                                                                                                                                                                                                                                                                                                                                                                                                                                                                                                                                                                                                                                                                                                                                                                                                                                                                                                                                                                                                                             |
| Intervention(s)                               | Consumption of food product with sweetener and sweetness enhancer<br>Consumption of sucrose-sweetened control food product                                                                                                                                                                                                                                                                                                                                                                                                                                                                                                                                                                                                                                                                                                                                                                                                                                                                                                                                                                                                                                                                                                                                                                                                                                                                                                                                                                                                                                                                                                                                                                                                                                                                                                                                                                                                                                                                                                                                                                                                                                                                                                                                                                                                                                                                                                                                                                                                                                                                                                                                                                                                                                                                                                                                                                                                                                                                                                                                                                                                                                                                                                                                                                                                                                                                                                                                                                                                                                                                                                                                                                                                                                                                                                                                                                                                                                                                                                                                                                                                                                                                                                                                                                                                   |
| Key inclusion and exclusion criteria          | Ages eligible for study: $\geq 18 \leq 60$ years ; Sexes eligible for study :both; Accepts healthy volunteers: yes                                                                                                                                                                                                                                                                                                                                                                                                                                                                                                                                                                                                                                                                                                                                                                                                                                                                                                                                                                                                                                                                                                                                                                                                                                                                                                                                                                                                                                                                                                                                                                                                                                                                                                                                                                                                                                                                                                                                                                                                                                                                                                                                                                                                                                                                                                                                                                                                                                                                                                                                                                                                                                                                                                                                                                                                                                                                                                                                                                                                                                                                                                                                                                                                                                                                                                                                                                                                                                                                                                                                                                                                                                                                                                                                                                                                                                                                                                                                                                                                                                                                                                                                                                                                           |
|                                               | <p>Inclusion criteria: BMI 25-35kgm<sup>2</sup>; Use of contraceptive methods or not planning to become pregnant for the duration of the study (women only); Regular consumption of sugar-containing foods and willing to consume sugar and artificially-sweetened food products; Liking of the intervention foods defined by a response of 'Yes' for the product during the pre-screening interview and a score of 40% or above on the Liking Visual Analogue Scale for the sucrose-sweetened control product; Able to participate on the Clinical Investigation Days during normal working hours; Healthy as determined from the self-reported medical history or when a clinical condition exists, when this is considered to be irrelevant (i.e. not influencing study outcomes) for the study by the study medical doctor; Consuming breakfast regularly (at least 5 days per week); Able to understand and be willing to sign the informed consent form, and to follow all the study procedures and requirements; Capacity to store at-home intervention quantity of intervention product</p> <p>Exclusion criteria: Blood donation &lt; 3 month prior to study or for full duration of the study; Food allergy, intolerance, restriction or avoidance of any of the study foods (e.g. veganism) or history of anaphylactic reaction to any food; Likelihood for disordered eating defined as a score <math>\geq 20</math> on the Eating Attitudes Test; Currently dieting to lose weight; Having lost or gained &gt;4.5 kg in the last 3 months; Smoking or having quit &lt;3 months prior to study; Habitually consuming &gt;14 units/week of alcohol in women or &gt;21 units/week in men in the last 3 months; Performing &gt;10 h of intense physical activity per week in the last 3 months; Night or late shift work (ending later than 11 pm on a permanent basis). Rotational shift work allowed if can attend on days that do not follow a late/night shift; Self-reported use of drugs of abuse within the previous 12 months; Pregnancy, lactation (women only); Persons who do not have access to either (mobile) phone or internet (this is necessary when being contacted by the study personnel during the study); Insufficient communication in the national language; Proven or suspected inability, physically or mentally, to comply with the procedures required by the study protocol as evaluated by the daily study manager, site-PI, PI or clinical responsible. This includes volunteers for which insufficient collaboration may be foreseen; Subject's general condition contraindicates continuing in the study as evaluated by the daily study manager, site-PI, PI or responsible clinician; Simultaneous participation in other relevant clinical intervention studies; Previous university or college training related to eating behaviour research; Self-reported eating disorders; Diagnosed anaemia; Diagnosed diabetes mellitus; Abnormal G.I. function or structure such as malformation, angiodysplasia, active peptic ulcer; Active inflammatory bowel disease, coeliac disease, chronic pancreatitis or other disorder potentially causing malabsorption; History of G.I. surgery with permanent effect (i.e. surgical treatment of obesity); Medical history of Cardiovascular Disease (e.g. current angina; myocardial infarction or stroke within the past 6 months; heart failure; symptomatic peripheral vascular disease); Significant liver disease, e.g. cirrhosis (fatty liver disease allowed); Malignancy which is currently active or in remission for less than five years after last treatment (local basal and squamous cell skin cancer allowed); Thyroid diseases, except those on Levothyroxine treatment of hypothyroidism if the person has been on a stable dose for at least 3months; Psychiatric illness (e.g. major depression, bipolar disorders); Use currently or within the previous 3 months of prescription or over the counter medication that has the potential of affecting appetite, satiety or body weight incl. food supplements. Except: low dose antidepressants if they, in the judgement of the daily study manager, site-PI, PI or clinical responsible, do not affect weight or following the study protocol. Levothyroxine for</p> |

|    |                                                                                                                                       |
|----|---------------------------------------------------------------------------------------------------------------------------------------|
| 1  |                                                                                                                                       |
| 2  |                                                                                                                                       |
| 3  | treatment of hypothyroidism is allowed if the person has been on a stable dose for at least 3 months. Cholesterol lowering            |
| 4  | medication, if the dose has changed during the last 3 months (i.e., the medication is allowed if the participant has been on a stable |
| 5  | dose for at least 3 months)                                                                                                           |
| 6  | Interventional                                                                                                                        |
| 7  | Allocation: Randomised. Double-blind, within-subjects, cross-over trial                                                               |
| 8  |                                                                                                                                       |
| 9  | Study type                                                                                                                            |
| 10 | Primary purpose: Evaluation                                                                                                           |
| 11 | Phase: N/A                                                                                                                            |
| 12 | Date of first enrolment                                                                                                               |
| 13 | April 2021                                                                                                                            |
| 14 | Target sample size                                                                                                                    |
| 15 | 213                                                                                                                                   |
| 16 | Recruitment status                                                                                                                    |
| 17 | Recruiting                                                                                                                            |
| 18 | Primary outcome(s)                                                                                                                    |
| 19 | Incremental area under the curve (iAUC) for composite appetite sensations in response to each product.                                |
| 20 | Leeds Food Preference Questionnaire (LFPQ) Explicit Liking, Implicit Wanting, Relative preference, Explicit wanting; Control of       |
| 21 | Eating Questionnaire (CoEQ): Craving Control, Craving for Sweet, Craving for Savoury, Positive Mood; Blood Glucose                    |
| 22 | Incremental Area Under the Curve; Blood Insulin Incremental Area Under the Curve; Cephalic and intestinal satiety biomarkers:         |
| 23 | Glucagon-like peptide-1 (GLP-1) Incremental area under the curve for blood GLP-1 concentrations in response to each product           |
| 24 | (120 min post intake); Ghrelin Incremental area under the curve for blood Ghrelin concentrations in response to each product          |
| 25 | (120 min post intake).                                                                                                                |
| 26 |                                                                                                                                       |
| 27 |                                                                                                                                       |
| 28 |                                                                                                                                       |
| 29 |                                                                                                                                       |
| 30 |                                                                                                                                       |
| 31 |                                                                                                                                       |
| 32 |                                                                                                                                       |
| 33 |                                                                                                                                       |
| 34 |                                                                                                                                       |
| 35 |                                                                                                                                       |
| 36 |                                                                                                                                       |
| 37 |                                                                                                                                       |
| 38 |                                                                                                                                       |
| 39 |                                                                                                                                       |
| 40 |                                                                                                                                       |
| 41 |                                                                                                                                       |
| 42 |                                                                                                                                       |
| 43 |                                                                                                                                       |
| 44 |                                                                                                                                       |
| 45 |                                                                                                                                       |
| 46 |                                                                                                                                       |
| 47 |                                                                                                                                       |
| 48 |                                                                                                                                       |
| 49 |                                                                                                                                       |
| 50 |                                                                                                                                       |
| 51 |                                                                                                                                       |
| 52 |                                                                                                                                       |
| 53 |                                                                                                                                       |
| 54 |                                                                                                                                       |
| 55 |                                                                                                                                       |
| 56 |                                                                                                                                       |
| 57 |                                                                                                                                       |
| 58 |                                                                                                                                       |
| 59 |                                                                                                                                       |
| 60 |                                                                                                                                       |



## Appendices: Informed Consent Materials and GDPR

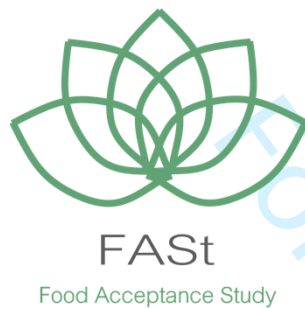

Institutional logo

### Informed Consent Form

Title of research project: Food Acceptance Study (FAST) [or include title in national language]

I confirm that: (please initial next to each statement to show you agree)

|                                                                                                                                                                                                                                                                                                              |  |
|--------------------------------------------------------------------------------------------------------------------------------------------------------------------------------------------------------------------------------------------------------------------------------------------------------------|--|
| I have obtained written and oral information about the research project and I am informed about the aim, methods, benefits and risks of participating in the study.                                                                                                                                          |  |
| I have read and have understood the information sheet [version number] for the above study. I have had the opportunity to consider the information, ask questions and have had these answered satisfactorily.                                                                                                |  |
| I understand that taking part in the study involves completing a screening visit plus 6 clinical investigation days during which I will need to consume foods, provide blood [urine, and faeces] samples and fill in questionnaires.                                                                         |  |
| I understand that I will not be able to donate blood for the duration of my participation in the study.                                                                                                                                                                                                      |  |
| I understand that my participation is voluntary and that I am free to stop taking part and can withdraw from the study prior to anonymization of the data (1 <sup>st</sup> March 2023) without giving any reason and without my rights being affected.                                                       |  |
| I understand that I can ask for access to the data I provide and I can request the destruction of that data at any time prior to anonymization of the data [add date]. I understand that after anonymization of the data, I will no longer be able to request access to or withdrawal of the data I provide. |  |

Appendices: Informed Consent Materials and GDPR

|                                                                                                                                                                                                                                                                       |  |
|-----------------------------------------------------------------------------------------------------------------------------------------------------------------------------------------------------------------------------------------------------------------------|--|
|                                                                                                                                                                                                                                                                       |  |
| I understand that the data, including any identifiable data I provide will be held securely and in line with data protection requirements at [add institution].                                                                                                       |  |
| I understand that pseudo-anonymised data (including my participant number) will be sent to other partners within the larger EU project for testing and analysis.                                                                                                      |  |
| I understand that pseudo-anonymised data may also be shared with other researchers who are not working on this study for future research purposes in the public interest.                                                                                             |  |
| I understand that fully anonymised data (after destruction of the ID-log) will be made available to the public (open access). As a result other external organisations or researchers will be also able to access these anonymised data for future research purposes. |  |
| I understand that my anonymised data will be retained indefinitely on password-protected computers at [add institution].                                                                                                                                              |  |
| I consent to participate in the above study.                                                                                                                                                                                                                          |  |
| [Remove if not applicable] I consent that my biological material will be stored in a research biobank at the [enter University].                                                                                                                                      |  |
| I have received a copy of this informed consent form as well as a copy of the Participant Information Sheet ([version number]) and a copy of the General Data Protection Regulation information sheet ([version number]).                                             |  |

Participant name: \_\_\_\_\_

Date: \_\_\_\_\_ Signature: \_\_\_\_\_

## Appendices: Informed Consent Materials and GDPR

In case new information that has substantial influence on your health emerges from the research project, you will be informed. If you would prefer **not** to be informed about such information please mark it here \_\_\_\_\_ (insert X).

-----

**Consent from the study staff that provided the oral information:**

I declare, that the participant has received both written and oral information about the research project.

I declare to the best of my knowledge and belief that the participant has received sufficient information to decide to participate in the research project.

Study staff name: \_\_\_\_\_

Date: \_\_\_\_\_ Signature: \_\_\_\_\_

National project identification: [include e.g. ethical approval number from ethical committee and date of approval]

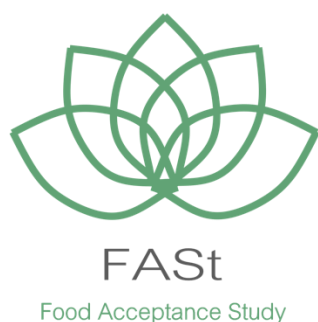

Institutional logo

**General Data Protection Regulation (GDPR) information for study participants**

**What data will be collected, how will they be used and who will see them?**

## Appendices: Informed Consent Materials and GDPR

In relation to your participation in the Food Acceptance Study (FAST), a range of data will be collected from you. This document explains how your data will be used.

### 1. Which data will be collected and how?

The data collected includes information about health and personal data e.g. name, [civil registration number if relevant, include name/type], contact information, gender and ethnicity and biological material (i.e. blood[,urine and faeces]). The data is registered in a personal participant folder and/or in an electronic database.

Data and biological material that is sent from the intervention site to other laboratories or researchers will contain a participant number but never your name or any other personal identifying data.

The investigators and other data processors will ensure that the information collected about you is not accessed by unauthorized persons and that your identity is protected when the results of the study are published. The online questionnaire delivery platform collecting body sensations and other measures will only use basic cookies to enable the proper functioning of the program. No marketing or other tracking cookies will be used.

### 2. How will my data be stored?

The investigators and the data manager will take all necessary security precautions to ensure that any identifying information about you is kept confidential and stored securely in accordance with local law [include name/references] and EU Regulation.

You will be assigned a unique ID number which your data will be identified by throughout the study. All electronic forms of data will be protected with a password which can only be accessed by the researchers. All data recorded on paper will be locked in study-specific storage cabinets accessible only to the researchers on the project.

## Appendices: Informed Consent Materials and GDPR

### 3. How long will my data be stored for?

*Pseudo-anonymised data* (including your participant ID) will be stored for up to 5 years. At that point, the participant ID-log will be destroyed and the pseudo-anonymised data will become fully anonymised data.

*Fully anonymised data* (not including your participant ID) after completion of the study will be retained indefinitely in an open-access repository (see point 7. *Will my data be archived for use in other research projects in the future below*).

Your biological samples (i.e. blood[, urine and faeces]) will be stored temporarily at the intervention site in freezers at either -20 or -80°C and later sent to other specialist laboratories for analysis. Once the biological material has been analysed for results related to this study, it will be destroyed by the laboratory. Destruction will happen at the latest by [2025] (five years after the study has ended).

[A research biobank contains biological material that is stored for future related research. If you wish to donate any excess of your biological material from this study to the research biobank of the [add university or other identifying name]), you must state it separately below. The donation is completely voluntary and does not affect your participation in this study. Samples in the biobank of the [university name] consist of a small amount (e.g. 5 ml blood [amend as suitable]), and are stored at [include name of intervention site] in freezers at -80 ° C for a maximum of 15 years after the study has ended. In order to conduct new analyses of your biological material from this biobank in a new study, the national ethical committee must first approve the study. You can always contact the intervention site and ask to have your samples in the biobank destroyed, unless the samples have been totally anonymised beforehand, which means that no one, nor the principal investigator, can longer assign the material to you. Sample full anonymization will take place alongside full anonymisation of all other data, after 5 years from study termination at the latest.]

### 4. What measures are in place to protect the security and confidentiality of my data?

The site-principal investigator will store an identifier (ID)-log (“key”) that associates your participant number with your personal information. This ID-log

## Appendices: Informed Consent Materials and GDPR

is stored at the intervention site separately from data and biological material in a locked room. Only a few relevant persons from the study staff have access to the ID-log including national and international authorities controlling clinical research projects e.g. the local ethical committee [and if relevant, include other local authorities]. The ID-log will be used to identify you in case it is relevant. The ID-log will be stored at the intervention site as long as it is relevant to have your contact information and for ethical and legal considerations related to the conduct of the study. The ID-log will be stored for a maximum of 5 years after the study has ended.

### **5. How will my data be used?**

The data collected will be securely forwarded to a project data hub at the University of Navarra (Spain) and subsequently used for analysis.

In case you withdraw from the study, the data already collected from you may be used and included in the analyses if the researchers find it important for the quality of the study. Already collected data from you will therefore only be processed if it is fair and important for the study. However, you may request that your data are destroyed and no further use is made of them. Please note, it will not be possible to withdraw your data after the results have been processed (this may be approximately 3 months after the study has ended, or by the 1<sup>st</sup> of March 2023).

The results of the study, regardless of whether they are positive, negative or inconclusive, will be written-up and submitted for publication after the end of the study e.g. as a publication in a journal, a summary of the test results on the Internet or at [www.clinicaltrials.gov](http://www.clinicaltrials.gov). Published results do not contain any information that can identify you.

### **6. Who will have access to my data?**

Your pseudo-anonymised data (including your participant number) will be securely sent to other partners within the larger EU project e.g. the University of Navarra (Spain) and the University of Surrey (UK) for analysis and your pseudo-anonymised biological material will be sent to partner laboratories, e.g. Bioatriki S.A. (Athens, Greece) for testing and analysis. Data and biological material are

## Appendices: Informed Consent Materials and GDPR

only sent from the intervention site to other laboratories with your participant number and never your name or other personal identifying data.

Pseudo-anonymised data may also be shared with other researchers who are not working on this study for future research purposes in the public interest.

After full anonymisation (destruction of the participant ID-log) the data collected in this study will be made available to the public (open access) by depositing it in an open access repository or other related archive. As a result, other external organisations or researchers will be also able to apply to access these fully anonymised data.

#### **7. Will my data be archived for use in other research projects in the future?**

Yes. We will make the fully anonymised data available to other organisations or researchers by depositing it in an open access repository or other archive. It is important that you understand that your data will be completely anonymised for these purposes, therefore there will be no way that you can be identified.

#### **8. How will my data be destroyed?**

The ID-log for all data will be stored for a maximum of 5 years after the study has ended. After that point, the ID-log will be destroyed and all data will be fully anonymized. After full anonymisation data will be available to the public (open access).

Any excess biological material will be destroyed by the handling laboratories after the analyses have been completed [keep/remove: unless you have chosen to donate some to a biobank in your local country. If this is the case, biobank material will be destroyed after 15 years following the termination of the study (i.e. by 2035)].

I confirm that I have read and agree to the above information about the handling, processing and storage of my personal information in this study

## Appendices: Informed Consent Materials and GDPR

as well as data sharing procedures between external partners within this larger EU project and other external organisations.

[Please, consider if you want to donate excess material for the biobank:

**Yes**, I want to donate potential excess biological material from me to a biobank.

**No**, I do not want to donate potential excess biological material from me to a biobank.]

**Participant's signature:**

---

---

Date  
Signature

Name

**Researcher's signature:**

---

---

Date  
Signature

Name



# Reporting checklist for protocol of a clinical trial.

Based on the SPIRIT guidelines.

## Instructions to authors

Complete this checklist by entering the page numbers from your manuscript where readers will find each of the items listed below.

Your article may not currently address all the items on the checklist. Please modify your text to include the missing information. If you are certain that an item does not apply, please write "n/a" and provide a short explanation.

Upload your completed checklist as an extra file when you submit to a journal.

In your methods section, say that you used the SPIRIT reporting guidelines, and cite them as:

Chan A-W, Tetzlaff JM, Gøtzsche PC, Altman DG, Mann H, Berlin J, Dickersin K, Hróbjartsson A, Schulz KF, Parulekar WR, Krleža-Jerić K, Laupacis A, Moher D. SPIRIT 2013 Explanation and Elaboration: Guidance for protocols of clinical trials. *BMJ*. 2013;346:e7586

|                                             |                     | Reporting Item                                                                                               | Page Number             |
|---------------------------------------------|---------------------|--------------------------------------------------------------------------------------------------------------|-------------------------|
| <b>Administrative information</b>           |                     |                                                                                                              |                         |
| Title                                       | <a href="#">#1</a>  | Descriptive title identifying the study design, population, interventions, and, if applicable, trial acronym | 1                       |
| Trial registration                          | <a href="#">#2a</a> | Trial identifier and registry name. If not yet registered, name of intended registry                         | 12                      |
| Trial registration: data set                | <a href="#">#2b</a> | All items from the World Health Organization Trial Registration Data Set                                     | Supplemental Material 6 |
| Protocol version                            | <a href="#">#3</a>  | Date and version identifier                                                                                  | 6                       |
| Funding                                     | <a href="#">#4</a>  | Sources and types of financial, material, and other support                                                  | 15                      |
| Roles and responsibilities: contributorship | <a href="#">#5a</a> | Names, affiliations, and roles of protocol contributors                                                      | 16                      |

|    |                      |                     |                                                     |          |
|----|----------------------|---------------------|-----------------------------------------------------|----------|
| 1  | Roles and            | <a href="#">#5b</a> | Name and contact information for the trial          | 15       |
| 2  | responsibilities:    |                     | sponsor                                             |          |
| 3  | sponsor contact      |                     |                                                     |          |
| 4  | information          |                     |                                                     |          |
| 5  |                      |                     |                                                     |          |
| 6  |                      |                     |                                                     |          |
| 7  | Roles and            | <a href="#">#5c</a> | Role of study sponsor and funders, if any, in       | 15       |
| 8  | responsibilities:    |                     | study design; collection, management, analysis,     |          |
| 9  | sponsor and funder   |                     | and interpretation of data; writing of the report;  |          |
| 10 |                      |                     | and the decision to submit the report for           |          |
| 11 |                      |                     | publication, including whether they will have       |          |
| 12 |                      |                     | ultimate authority over any of these activities     |          |
| 13 |                      |                     |                                                     |          |
| 14 |                      |                     |                                                     |          |
| 15 |                      |                     |                                                     |          |
| 16 |                      |                     |                                                     |          |
| 17 | Roles and            | <a href="#">#5d</a> | Composition, roles, and responsibilities of the     | 7 and 15 |
| 18 | responsibilities:    |                     | coordinating centre, steering committee,            |          |
| 19 | committees           |                     | endpoint adjudication committee, data               |          |
| 20 |                      |                     | management team, and other individuals or           |          |
| 21 |                      |                     | groups overseeing the trial, if applicable (see     |          |
| 22 |                      |                     | Item 21a for data monitoring committee)             |          |
| 23 |                      |                     |                                                     |          |
| 24 |                      |                     |                                                     |          |
| 25 |                      |                     |                                                     |          |
| 26 |                      |                     |                                                     |          |
| 27 | <b>Introduction</b>  |                     |                                                     |          |
| 28 |                      |                     |                                                     |          |
| 29 | Background and       | <a href="#">#6a</a> | Description of research question and justification  | 4        |
| 30 | rationale            |                     | for undertaking the trial, including summary of     |          |
| 31 |                      |                     | relevant studies (published and unpublished)        |          |
| 32 |                      |                     | examining benefits and harms for each               |          |
| 33 |                      |                     | intervention                                        |          |
| 34 |                      |                     |                                                     |          |
| 35 |                      |                     |                                                     |          |
| 36 |                      |                     |                                                     |          |
| 37 |                      |                     |                                                     |          |
| 38 | Background and       | <a href="#">#6b</a> | Explanation for choice of comparators               | 4        |
| 39 | rationale: choice of |                     |                                                     |          |
| 40 | comparators          |                     |                                                     |          |
| 41 |                      |                     |                                                     |          |
| 42 |                      |                     |                                                     |          |
| 43 | Objectives           | <a href="#">#7</a>  | Specific objectives or hypotheses                   | 5        |
| 44 |                      |                     |                                                     |          |
| 45 |                      |                     |                                                     |          |
| 46 | Trial design         | <a href="#">#8</a>  | Description of trial design including type of trial | 6        |
| 47 |                      |                     | (eg, parallel group, crossover, factorial, single   |          |
| 48 |                      |                     | group), allocation ratio, and framework (eg,        |          |
| 49 |                      |                     | superiority, equivalence, non-inferiority,          |          |
| 50 |                      |                     | exploratory)                                        |          |
| 51 |                      |                     |                                                     |          |
| 52 |                      |                     |                                                     |          |
| 53 |                      |                     |                                                     |          |

**Methods:  
Participants,  
interventions, and  
outcomes**

|    |                                 |                      |                                                                                                                                                                                                                                                                                                                                                                                |                                   |
|----|---------------------------------|----------------------|--------------------------------------------------------------------------------------------------------------------------------------------------------------------------------------------------------------------------------------------------------------------------------------------------------------------------------------------------------------------------------|-----------------------------------|
| 1  | Study setting                   | <a href="#">#9</a>   | Description of study settings (eg, community clinic, academic hospital) and list of countries where data will be collected. Reference to where list of study sites can be obtained                                                                                                                                                                                             | 7                                 |
| 2  |                                 |                      |                                                                                                                                                                                                                                                                                                                                                                                |                                   |
| 3  |                                 |                      |                                                                                                                                                                                                                                                                                                                                                                                |                                   |
| 4  |                                 |                      |                                                                                                                                                                                                                                                                                                                                                                                |                                   |
| 5  |                                 |                      |                                                                                                                                                                                                                                                                                                                                                                                |                                   |
| 6  |                                 |                      |                                                                                                                                                                                                                                                                                                                                                                                |                                   |
| 7  |                                 |                      |                                                                                                                                                                                                                                                                                                                                                                                |                                   |
| 8  | Eligibility criteria            | <a href="#">#10</a>  | Inclusion and exclusion criteria for participants. If applicable, eligibility criteria for study centres and individuals who will perform the interventions (eg, surgeons, psychotherapists)                                                                                                                                                                                   | 7 & Supplemental Material 1       |
| 9  |                                 |                      |                                                                                                                                                                                                                                                                                                                                                                                |                                   |
| 10 |                                 |                      |                                                                                                                                                                                                                                                                                                                                                                                |                                   |
| 11 |                                 |                      |                                                                                                                                                                                                                                                                                                                                                                                |                                   |
| 12 |                                 |                      |                                                                                                                                                                                                                                                                                                                                                                                |                                   |
| 13 |                                 |                      |                                                                                                                                                                                                                                                                                                                                                                                |                                   |
| 14 | Interventions: description      | <a href="#">#11a</a> | Interventions for each group with sufficient detail to allow replication, including how and when they will be administered                                                                                                                                                                                                                                                     | 7-8                               |
| 15 |                                 |                      |                                                                                                                                                                                                                                                                                                                                                                                |                                   |
| 16 |                                 |                      |                                                                                                                                                                                                                                                                                                                                                                                |                                   |
| 17 |                                 |                      |                                                                                                                                                                                                                                                                                                                                                                                |                                   |
| 18 |                                 |                      |                                                                                                                                                                                                                                                                                                                                                                                |                                   |
| 19 |                                 |                      |                                                                                                                                                                                                                                                                                                                                                                                |                                   |
| 20 | Interventions: modifications    | <a href="#">#11b</a> | Criteria for discontinuing or modifying allocated interventions for a given trial participant (eg, drug dose change in response to harms, participant request, or improving / worsening disease)                                                                                                                                                                               | N/A not required                  |
| 21 |                                 |                      |                                                                                                                                                                                                                                                                                                                                                                                |                                   |
| 22 |                                 |                      |                                                                                                                                                                                                                                                                                                                                                                                |                                   |
| 23 |                                 |                      |                                                                                                                                                                                                                                                                                                                                                                                |                                   |
| 24 |                                 |                      |                                                                                                                                                                                                                                                                                                                                                                                |                                   |
| 25 |                                 |                      |                                                                                                                                                                                                                                                                                                                                                                                |                                   |
| 26 |                                 |                      |                                                                                                                                                                                                                                                                                                                                                                                |                                   |
| 27 | Interventions: adherence        | <a href="#">#11c</a> | Strategies to improve adherence to intervention protocols, and any procedures for monitoring adherence (eg, drug tablet return; laboratory tests)                                                                                                                                                                                                                              | N/A Not required                  |
| 28 |                                 |                      |                                                                                                                                                                                                                                                                                                                                                                                |                                   |
| 29 |                                 |                      |                                                                                                                                                                                                                                                                                                                                                                                |                                   |
| 30 |                                 |                      |                                                                                                                                                                                                                                                                                                                                                                                |                                   |
| 31 |                                 |                      |                                                                                                                                                                                                                                                                                                                                                                                |                                   |
| 32 |                                 |                      |                                                                                                                                                                                                                                                                                                                                                                                |                                   |
| 33 |                                 |                      |                                                                                                                                                                                                                                                                                                                                                                                |                                   |
| 34 | Interventions: concomitant care | <a href="#">#11d</a> | Relevant concomitant care and interventions that are permitted or prohibited during the trial                                                                                                                                                                                                                                                                                  | N/A participants are not patients |
| 35 |                                 |                      |                                                                                                                                                                                                                                                                                                                                                                                |                                   |
| 36 |                                 |                      |                                                                                                                                                                                                                                                                                                                                                                                |                                   |
| 37 | Outcomes                        | <a href="#">#12</a>  | Primary, secondary, and other outcomes, including the specific measurement variable (eg, systolic blood pressure), analysis metric (eg, change from baseline, final value, time to event), method of aggregation (eg, median, proportion), and time point for each outcome. Explanation of the clinical relevance of chosen efficacy and harm outcomes is strongly recommended | 12                                |
| 38 |                                 |                      |                                                                                                                                                                                                                                                                                                                                                                                |                                   |
| 39 |                                 |                      |                                                                                                                                                                                                                                                                                                                                                                                |                                   |
| 40 |                                 |                      |                                                                                                                                                                                                                                                                                                                                                                                |                                   |
| 41 |                                 |                      |                                                                                                                                                                                                                                                                                                                                                                                |                                   |
| 42 |                                 |                      |                                                                                                                                                                                                                                                                                                                                                                                |                                   |
| 43 |                                 |                      |                                                                                                                                                                                                                                                                                                                                                                                |                                   |
| 44 |                                 |                      |                                                                                                                                                                                                                                                                                                                                                                                |                                   |
| 45 |                                 |                      |                                                                                                                                                                                                                                                                                                                                                                                |                                   |
| 46 |                                 |                      |                                                                                                                                                                                                                                                                                                                                                                                |                                   |
| 47 |                                 |                      |                                                                                                                                                                                                                                                                                                                                                                                |                                   |
| 48 |                                 |                      |                                                                                                                                                                                                                                                                                                                                                                                |                                   |
| 49 |                                 |                      |                                                                                                                                                                                                                                                                                                                                                                                |                                   |
| 50 | Participant timeline            | <a href="#">#13</a>  | Time schedule of enrolment, interventions (including any run-ins and washouts), assessments, and visits for participants. A schematic diagram is highly recommended (see Figure)                                                                                                                                                                                               | 7                                 |
| 51 |                                 |                      |                                                                                                                                                                                                                                                                                                                                                                                |                                   |
| 52 |                                 |                      |                                                                                                                                                                                                                                                                                                                                                                                |                                   |
| 53 |                                 |                      |                                                                                                                                                                                                                                                                                                                                                                                |                                   |
| 54 |                                 |                      |                                                                                                                                                                                                                                                                                                                                                                                |                                   |
| 55 |                                 |                      |                                                                                                                                                                                                                                                                                                                                                                                |                                   |
| 56 |                                 |                      |                                                                                                                                                                                                                                                                                                                                                                                |                                   |
| 57 |                                 |                      |                                                                                                                                                                                                                                                                                                                                                                                |                                   |
| 58 |                                 |                      |                                                                                                                                                                                                                                                                                                                                                                                |                                   |
| 59 |                                 |                      |                                                                                                                                                                                                                                                                                                                                                                                |                                   |
| 60 |                                 |                      |                                                                                                                                                                                                                                                                                                                                                                                |                                   |

|    |                           |                      |                                                       |                         |
|----|---------------------------|----------------------|-------------------------------------------------------|-------------------------|
| 1  | Sample size               | <a href="#">#14</a>  | Estimated number of participants needed to            | 6                       |
| 2  |                           |                      | achieve study objectives and how it was               |                         |
| 3  |                           |                      | determined, including clinical and statistical        |                         |
| 4  |                           |                      | assumptions supporting any sample size                |                         |
| 5  |                           |                      | calculations                                          |                         |
| 6  |                           |                      |                                                       |                         |
| 7  |                           |                      |                                                       |                         |
| 8  |                           |                      |                                                       |                         |
| 9  | Recruitment               | <a href="#">#15</a>  | Strategies for achieving adequate participant         | 8                       |
| 10 |                           |                      | enrolment to reach target sample size                 |                         |
| 11 |                           |                      |                                                       |                         |
| 12 |                           |                      |                                                       |                         |
| 13 | <b>Methods:</b>           |                      |                                                       |                         |
| 14 | <b>Assignment of</b>      |                      |                                                       |                         |
| 15 | <b>interventions (for</b> |                      |                                                       |                         |
| 16 | <b>controlled trials)</b> |                      |                                                       |                         |
| 17 |                           |                      |                                                       |                         |
| 18 |                           |                      |                                                       |                         |
| 19 |                           |                      |                                                       |                         |
| 20 | Allocation: sequence      | <a href="#">#16a</a> | Method of generating the allocation sequence          | 8-9                     |
| 21 | generation                |                      | (eg, computer-generated random numbers), and          |                         |
| 22 |                           |                      | list of any factors for stratification. To reduce     |                         |
| 23 |                           |                      | predictability of a random sequence, details of       |                         |
| 24 |                           |                      | any planned restriction (eg, blocking) should be      |                         |
| 25 |                           |                      | provided in a separate document that is               |                         |
| 26 |                           |                      | unavailable to those who enrol participants or        |                         |
| 27 |                           |                      | assign interventions                                  |                         |
| 28 |                           |                      |                                                       |                         |
| 29 |                           |                      |                                                       |                         |
| 30 |                           |                      |                                                       |                         |
| 31 |                           |                      |                                                       |                         |
| 32 |                           |                      |                                                       |                         |
| 33 | Allocation                | <a href="#">#16b</a> | Mechanism of implementing the allocation              | 9                       |
| 34 | concealment               |                      | sequence (eg, central telephone; sequentially         |                         |
| 35 | mechanism                 |                      | numbered, opaque, sealed envelopes),                  |                         |
| 36 |                           |                      | describing any steps to conceal the sequence          |                         |
| 37 |                           |                      | until interventions are assigned                      |                         |
| 38 |                           |                      |                                                       |                         |
| 39 |                           |                      |                                                       |                         |
| 40 |                           |                      |                                                       |                         |
| 41 | Allocation:               | <a href="#">#16c</a> | Who will generate the allocation sequence, who        | 8                       |
| 42 | implementation            |                      | will enrol participants, and who will assign          |                         |
| 43 |                           |                      | participants to interventions                         |                         |
| 44 |                           |                      |                                                       |                         |
| 45 |                           |                      |                                                       |                         |
| 46 | Blinding (masking)        | <a href="#">#17a</a> | Who will be blinded after assignment to               | 9                       |
| 47 |                           |                      | interventions (eg, trial participants, care           |                         |
| 48 |                           |                      | providers, outcome assessors, data analysts),         |                         |
| 49 |                           |                      | and how                                               |                         |
| 50 |                           |                      |                                                       |                         |
| 51 |                           |                      |                                                       |                         |
| 52 |                           |                      |                                                       |                         |
| 53 | Blinding (masking):       | <a href="#">#17b</a> | If blinded, circumstances under which unblinding      | N/A: No safety/critical |
| 54 | emergency                 |                      | is permissible, and procedure for revealing a         | efficacy issues present |
| 55 | unblinding                |                      | participant's allocated intervention during the trial |                         |
| 56 |                           |                      |                                                       |                         |
| 57 |                           |                      |                                                       |                         |
| 58 |                           |                      |                                                       |                         |
| 59 |                           |                      |                                                       |                         |
| 60 |                           |                      |                                                       |                         |

1 **Methods: Data**  
 2 **collection,**  
 3 **management, and**  
 4 **analysis**  
 5  
 6

|    |                                                  |                      |                                                                                                                                                                                                                                                                                                                                                                                                              |
|----|--------------------------------------------------|----------------------|--------------------------------------------------------------------------------------------------------------------------------------------------------------------------------------------------------------------------------------------------------------------------------------------------------------------------------------------------------------------------------------------------------------|
| 7  |                                                  |                      |                                                                                                                                                                                                                                                                                                                                                                                                              |
| 8  | Data collection plan                             | <a href="#">#18a</a> | Plans for assessment and collection of outcome, baseline, and other trial data, including any related processes to promote data quality (eg, duplicate measurements, training of assessors) and a description of study instruments (eg, questionnaires, laboratory tests) along with their reliability and validity, if known. Reference to where data collection forms can be found, if not in the protocol |
| 9  |                                                  |                      | 15; Supplemental                                                                                                                                                                                                                                                                                                                                                                                             |
| 10 |                                                  |                      | Material 4                                                                                                                                                                                                                                                                                                                                                                                                   |
| 11 |                                                  |                      |                                                                                                                                                                                                                                                                                                                                                                                                              |
| 12 |                                                  |                      |                                                                                                                                                                                                                                                                                                                                                                                                              |
| 13 |                                                  |                      |                                                                                                                                                                                                                                                                                                                                                                                                              |
| 14 |                                                  |                      |                                                                                                                                                                                                                                                                                                                                                                                                              |
| 15 |                                                  |                      |                                                                                                                                                                                                                                                                                                                                                                                                              |
| 16 |                                                  |                      |                                                                                                                                                                                                                                                                                                                                                                                                              |
| 17 |                                                  |                      |                                                                                                                                                                                                                                                                                                                                                                                                              |
| 18 |                                                  |                      |                                                                                                                                                                                                                                                                                                                                                                                                              |
| 19 |                                                  |                      |                                                                                                                                                                                                                                                                                                                                                                                                              |
| 20 |                                                  |                      |                                                                                                                                                                                                                                                                                                                                                                                                              |
| 21 |                                                  |                      |                                                                                                                                                                                                                                                                                                                                                                                                              |
| 22 | Data collection plan: retention                  | <a href="#">#18b</a> | Plans to promote participant retention and complete follow-up, including list of any outcome data to be collected for participants who discontinue or deviate from intervention protocols                                                                                                                                                                                                                    |
| 23 |                                                  |                      | N/A Data from                                                                                                                                                                                                                                                                                                                                                                                                |
| 24 |                                                  |                      | participants who                                                                                                                                                                                                                                                                                                                                                                                             |
| 25 |                                                  |                      | discontinue/ deviate from                                                                                                                                                                                                                                                                                                                                                                                    |
| 26 |                                                  |                      | protocol not collected                                                                                                                                                                                                                                                                                                                                                                                       |
| 27 |                                                  |                      |                                                                                                                                                                                                                                                                                                                                                                                                              |
| 28 |                                                  |                      |                                                                                                                                                                                                                                                                                                                                                                                                              |
| 29 |                                                  |                      |                                                                                                                                                                                                                                                                                                                                                                                                              |
| 30 | Data management                                  | <a href="#">#19</a>  | Plans for data entry, coding, security, and storage, including any related processes to promote data quality (eg, double data entry; range checks for data values). Reference to where details of data management procedures can be found, if not in the protocol                                                                                                                                            |
| 31 |                                                  |                      | 15; appendices                                                                                                                                                                                                                                                                                                                                                                                               |
| 32 |                                                  |                      |                                                                                                                                                                                                                                                                                                                                                                                                              |
| 33 |                                                  |                      |                                                                                                                                                                                                                                                                                                                                                                                                              |
| 34 |                                                  |                      |                                                                                                                                                                                                                                                                                                                                                                                                              |
| 35 |                                                  |                      |                                                                                                                                                                                                                                                                                                                                                                                                              |
| 36 |                                                  |                      |                                                                                                                                                                                                                                                                                                                                                                                                              |
| 37 |                                                  |                      |                                                                                                                                                                                                                                                                                                                                                                                                              |
| 38 |                                                  |                      |                                                                                                                                                                                                                                                                                                                                                                                                              |
| 39 |                                                  |                      |                                                                                                                                                                                                                                                                                                                                                                                                              |
| 40 | Statistics: outcomes                             | <a href="#">#20a</a> | Statistical methods for analysing primary and secondary outcomes. Reference to where other details of the statistical analysis plan can be found, if not in the protocol                                                                                                                                                                                                                                     |
| 41 |                                                  |                      | 14                                                                                                                                                                                                                                                                                                                                                                                                           |
| 42 |                                                  |                      |                                                                                                                                                                                                                                                                                                                                                                                                              |
| 43 |                                                  |                      |                                                                                                                                                                                                                                                                                                                                                                                                              |
| 44 |                                                  |                      |                                                                                                                                                                                                                                                                                                                                                                                                              |
| 45 |                                                  |                      |                                                                                                                                                                                                                                                                                                                                                                                                              |
| 46 |                                                  |                      |                                                                                                                                                                                                                                                                                                                                                                                                              |
| 47 | Statistics: additional analyses                  | <a href="#">#20b</a> | Methods for any additional analyses (eg, subgroup and adjusted analyses)                                                                                                                                                                                                                                                                                                                                     |
| 48 |                                                  |                      | N/A, no analysis                                                                                                                                                                                                                                                                                                                                                                                             |
| 49 |                                                  |                      | included                                                                                                                                                                                                                                                                                                                                                                                                     |
| 50 |                                                  |                      |                                                                                                                                                                                                                                                                                                                                                                                                              |
| 51 | Statistics: analysis population and missing data | <a href="#">#20c</a> | Definition of analysis population relating to protocol non-adherence (eg, as randomised analysis), and any statistical methods to handle missing data (eg, multiple imputation)                                                                                                                                                                                                                              |
| 52 |                                                  |                      | N/A, no analysis                                                                                                                                                                                                                                                                                                                                                                                             |
| 53 |                                                  |                      | included                                                                                                                                                                                                                                                                                                                                                                                                     |
| 54 |                                                  |                      |                                                                                                                                                                                                                                                                                                                                                                                                              |
| 55 |                                                  |                      |                                                                                                                                                                                                                                                                                                                                                                                                              |
| 56 |                                                  |                      |                                                                                                                                                                                                                                                                                                                                                                                                              |
| 57 |                                                  |                      |                                                                                                                                                                                                                                                                                                                                                                                                              |
| 58 |                                                  |                      |                                                                                                                                                                                                                                                                                                                                                                                                              |
| 59 |                                                  |                      |                                                                                                                                                                                                                                                                                                                                                                                                              |
| 60 |                                                  |                      |                                                                                                                                                                                                                                                                                                                                                                                                              |

**Methods:****Monitoring**

|    |                      |                      |                                                      |
|----|----------------------|----------------------|------------------------------------------------------|
| 1  |                      |                      |                                                      |
| 2  |                      |                      |                                                      |
| 3  |                      |                      |                                                      |
| 4  |                      |                      |                                                      |
| 5  | Data monitoring:     | <a href="#">#21a</a> | Composition of data monitoring committee             |
| 6  | formal committee     |                      | (DMC); summary of its role and reporting             |
| 7  |                      |                      | structure; statement of whether it is independent    |
| 8  |                      |                      | from the sponsor and competing interests; and        |
| 9  |                      |                      | reference to where further details about its         |
| 10 |                      |                      | charter can be found, if not in the protocol.        |
| 11 |                      |                      | Alternatively, an explanation of why a DMC is        |
| 12 |                      |                      | not needed                                           |
| 13 |                      |                      |                                                      |
| 14 |                      |                      |                                                      |
| 15 |                      |                      |                                                      |
| 16 |                      |                      |                                                      |
| 17 |                      |                      |                                                      |
| 18 | Data monitoring:     | <a href="#">#21b</a> | Description of any interim analyses and stopping     |
| 19 | interim analysis     |                      | guidelines, including who will have access to        |
| 20 |                      |                      | these interim results and make the final decision    |
| 21 |                      |                      | to terminate the trial                               |
| 22 |                      |                      |                                                      |
| 23 |                      |                      |                                                      |
| 24 | Harms                | <a href="#">#22</a>  | Plans for collecting, assessing, reporting, and      |
| 25 |                      |                      | managing solicited and spontaneously reported        |
| 26 |                      |                      | adverse events and other unintended effects of       |
| 27 |                      |                      | trial interventions or trial conduct                 |
| 28 |                      |                      |                                                      |
| 29 |                      |                      |                                                      |
| 30 |                      |                      |                                                      |
| 31 | Auditing             | <a href="#">#23</a>  | Frequency and procedures for auditing trial          |
| 32 |                      |                      | conduct, if any, and whether the process will be     |
| 33 |                      |                      | independent from investigators and the sponsor       |
| 34 |                      |                      |                                                      |
| 35 |                      |                      |                                                      |
| 36 |                      |                      |                                                      |
| 37 | <b>Ethics and</b>    |                      |                                                      |
| 38 | <b>dissemination</b> |                      |                                                      |
| 39 |                      |                      |                                                      |
| 40 | Research ethics      | <a href="#">#24</a>  | Plans for seeking research ethics committee /        |
| 41 | approval             |                      | institutional review board (REC / IRB) approval      |
| 42 |                      |                      |                                                      |
| 43 |                      |                      |                                                      |
| 44 | Protocol             | <a href="#">#25</a>  | Plans for communicating important protocol           |
| 45 | amendments           |                      | modifications (eg, changes to eligibility criteria,  |
| 46 |                      |                      | outcomes, analyses) to relevant parties (eg,         |
| 47 |                      |                      | investigators, REC / IRBs, trial participants, trial |
| 48 |                      |                      | registries, journals, regulators)                    |
| 49 |                      |                      |                                                      |
| 50 |                      |                      |                                                      |
| 51 |                      |                      |                                                      |
| 52 | Consent or assent    | <a href="#">#26a</a> | Who will obtain informed consent or assent from      |
| 53 |                      |                      | potential trial participants or authorised           |
| 54 |                      |                      | surrogates, and how (see Item 32)                    |
| 55 |                      |                      |                                                      |
| 56 |                      |                      |                                                      |
| 57 |                      |                      |                                                      |
| 58 |                      |                      |                                                      |
| 59 |                      |                      |                                                      |
| 60 |                      |                      |                                                      |

|    |                       |                      |                                                       |                         |
|----|-----------------------|----------------------|-------------------------------------------------------|-------------------------|
| 1  | Consent or assent:    | <a href="#">#26b</a> | Additional consent provisions for collection and      | N/A                     |
| 2  | ancillary studies     |                      | use of participant data and biological specimens      |                         |
| 3  |                       |                      | in ancillary studies, if applicable                   |                         |
| 4  |                       |                      |                                                       |                         |
| 5  |                       |                      |                                                       |                         |
| 6  | Confidentiality       | <a href="#">#27</a>  | How personal information about potential and          | Appendices              |
| 7  |                       |                      | enrolled participants will be collected, shared,      |                         |
| 8  |                       |                      | and maintained in order to protect confidentiality    |                         |
| 9  |                       |                      | before, during, and after the trial                   |                         |
| 10 |                       |                      |                                                       |                         |
| 11 |                       |                      |                                                       |                         |
| 12 |                       |                      |                                                       |                         |
| 13 | Declaration of        | <a href="#">#28</a>  | Financial and other competing interests for           | 15                      |
| 14 | interests             |                      | principal investigators for the overall trial and     |                         |
| 15 |                       |                      | each study site                                       |                         |
| 16 |                       |                      |                                                       |                         |
| 17 |                       |                      |                                                       |                         |
| 18 | Data access           | <a href="#">#29</a>  | Statement of who will have access to the final        | 15                      |
| 19 |                       |                      | trial dataset, and disclosure of contractual          |                         |
| 20 |                       |                      | agreements that limit such access for                 |                         |
| 21 |                       |                      | investigators                                         |                         |
| 22 |                       |                      |                                                       |                         |
| 23 |                       |                      |                                                       |                         |
| 24 |                       |                      |                                                       |                         |
| 25 | Ancillary and post    | <a href="#">#30</a>  | Provisions, if any, for ancillary and post-trial      | N/A: No safety/critical |
| 26 | trial care            |                      | care, and for compensation to those who suffer        | efficacy issues present |
| 27 |                       |                      | harm from trial participation                         |                         |
| 28 |                       |                      |                                                       |                         |
| 29 |                       |                      |                                                       |                         |
| 30 |                       |                      |                                                       |                         |
| 31 | Dissemination         | <a href="#">#31a</a> | Plans for investigators and sponsor to                | 15                      |
| 32 | policy: trial results |                      | communicate trial results to participants,            |                         |
| 33 |                       |                      | healthcare professionals, the public, and other       |                         |
| 34 |                       |                      | relevant groups (eg, via publication, reporting in    |                         |
| 35 |                       |                      | results databases, or other data sharing              |                         |
| 36 |                       |                      | arrangements), including any publication              |                         |
| 37 |                       |                      | restrictions                                          |                         |
| 38 |                       |                      |                                                       |                         |
| 39 |                       |                      |                                                       |                         |
| 40 |                       |                      |                                                       |                         |
| 41 |                       |                      |                                                       |                         |
| 42 | Dissemination         | <a href="#">#31b</a> | Authorship eligibility guidelines and any intended    | 16                      |
| 43 | policy: authorship    |                      | use of professional writers                           |                         |
| 44 |                       |                      |                                                       |                         |
| 45 |                       |                      |                                                       |                         |
| 46 | Dissemination         | <a href="#">#31c</a> | Plans, if any, for granting public access to the full | 15                      |
| 47 | policy: reproducible  |                      | protocol, participant-level dataset, and statistical  |                         |
| 48 | research              |                      | code                                                  |                         |
| 49 |                       |                      |                                                       |                         |
| 50 |                       |                      |                                                       |                         |
| 51 | <b>Appendices</b>     |                      |                                                       |                         |
| 52 |                       |                      |                                                       |                         |
| 53 |                       |                      |                                                       |                         |
| 54 | Informed consent      | <a href="#">#32</a>  | Model consent form and other related                  | Appendices              |
| 55 | materials             |                      | documentation given to participants and               |                         |
| 56 |                       |                      | authorised surrogates                                 |                         |
| 57 |                       |                      |                                                       |                         |
| 58 |                       |                      |                                                       |                         |
| 59 |                       |                      |                                                       |                         |
| 60 |                       |                      |                                                       |                         |

1 Biological specimens [#33](#) Plans for collection, laboratory evaluation, and 12  
2 storage of biological specimens for genetic or  
3 molecular analysis in the current trial and for  
4 future use in ancillary studies, if applicable  
5  
6  
7

8 None The SPIRIT Explanation and Elaboration paper is distributed under the terms of the Creative  
9 Commons Attribution License CC-BY-NC. This checklist can be completed online using  
10 <https://www.goodreports.org/>, a tool made by the [EQUATOR Network](#) in collaboration with  
11 [Penelope.ai](#)  
12  
13  
14  
15  
16  
17  
18  
19  
20  
21  
22  
23  
24  
25  
26  
27  
28  
29  
30  
31  
32  
33  
34  
35  
36  
37  
38  
39  
40  
41  
42  
43  
44  
45  
46  
47  
48  
49  
50  
51  
52  
53  
54  
55  
56  
57  
58  
59  
60
