# Supplementary material for: Acute and repeated impact of sweeteners and sweetness enhancers in solid and semi-solid foods on appetite: protocol for a multicentre, cross-over, RCT in people with overweight/obesity – the SWEET Project
Source: PubMed Central journal article supplement — BMJ Open. 2022 Dec 23;12(12):e063903. doi: 10.1136/bmjopen-2022-063903 (PMC9791453; doi:10.1136/bmjopen-2022-063903), 2022-12-23
Supplement: bmjopen-2022-063903supp002.pdf [file bmjopen-2022-063903supp002.pdf]

## Supplemental Material 2: Product Nutritional Information

Table 1: Proposed energy and nutrient composition of the intervention products

|                                    | Control  |                                                              | Reformulation |                                                              |
|------------------------------------|----------|--------------------------------------------------------------|---------------|--------------------------------------------------------------|
| <b>Cake with fruit filling</b>     | Per 100g | Per portion<br>(85g/ 3 cakes)                                | Per 100g      | Per portion<br>(85g/ 3 cakes)                                |
| Energy (kcal)                      | 391      | 332                                                          | 343           | 292                                                          |
| Energy (kJ)                        | 1638     | 1392                                                         | 1427          | 1213                                                         |
| Fats (g)                           | 16.6     | 14.1                                                         | 16.5          | 14.0                                                         |
| Sat. fats (g)                      | 1.7      | 1.4                                                          | 1.7           | 1.4                                                          |
| Carbs (g)                          | 56.8     | 48.2                                                         | 57.0          | 48.4                                                         |
| Sugars (g)                         | 28.3     | 24.1                                                         | 1.3           | 1.1                                                          |
| Polyols (g)                        | 3.7      | 3.1                                                          | 28.4          | 24.1                                                         |
| Fibre (g)                          | 1.4      | 1.2                                                          | 1.3           | 1.1                                                          |
| Proteins (g)                       | 5.7      | 4.8                                                          | 5.7           | 4.8                                                          |
| Salt (mg)                          | 0.4      | 0.3                                                          | 0.4           | 0.3                                                          |
| <b>Biscuit</b>                     | Per 100g | Per portion<br>(3 biscuits)                                  | Per 100g      | Per portion<br>(3 biscuits)                                  |
| Energy (kcal)                      | 423      | 360                                                          | 384           | 326                                                          |
| Energy (kJ)                        | 1783     | 1516                                                         | 1609          | 1368                                                         |
| Fats (g)                           | 11.2     | 9.5                                                          | 11.5          | 9.8                                                          |
| Sat. fats (g)                      | 7.11     | 6.0                                                          | 7.33          | 6.2                                                          |
| Carbs (g)                          | 75.9     | 64.5                                                         | 76.2          | 64.8                                                         |
| Sugars (g)                         | 24.7     | 21.0                                                         | 1.8           | 1.5                                                          |
| Polyols (g)                        | 3.7      | 3.1                                                          | 22.7          | 19.3                                                         |
| Fibre (g)                          | 0.7      | 0.6                                                          | 2.4           | 2.0                                                          |
| Proteins (g)                       | 6.5      | 5.5                                                          | 6.6           | 5.6                                                          |
| Salt (mg)                          | 0.7      | 0.6                                                          | 0.7           | 0.6                                                          |
| <b>Creamy yoghurt</b>              | Per 100g | Per portion<br>(135g 1 serving)                              | Per 100g      | Per portion<br>(135g 1 serving)                              |
| Energy (kcal)                      | 226      | 305                                                          | 180           | 242                                                          |
| Energy (kJ)                        | 943      | 1286                                                         | 750           | 1013                                                         |
| Fats (g)                           | 18.5     | 25.0                                                         | 16.3          | 22.0                                                         |
| Sat. fats (g)                      | 8.3      | 18.7                                                         | 8.3           | 18.7                                                         |
| Carbs (g)                          | 8.12     | 10.96                                                        | 1.71          | 2.31                                                         |
| Sugars (g)                         | 8.12     | 10.96                                                        | 1.71          | 2.31                                                         |
| Polyols (g)                        | 0.00     | 0.00                                                         | 0.00          | 0.00                                                         |
| Fibre (g)                          | 0.00     | 0.00                                                         | 0.00          | 0.00                                                         |
| Proteins (g)                       | 6.50     | 8.78                                                         | 6.50          | 8.78                                                         |
| Salt (mg)                          | 0.14     | 0.32                                                         | 0.14          | 0.32                                                         |
| <b>Chocolate</b>                   | Per 100g | Per portion<br>(60g 1 bar)                                   | Per 100g      | Per portion<br>(60g 1 bar)                                   |
| Energy (kcal)                      | 500      | 325                                                          | 477           | 310                                                          |
| Energy (kJ)                        | 2098     | 1364                                                         | 2004          | 1303                                                         |
| Fats (g)                           | 31       | 20                                                           | 31            | 20                                                           |
| Sat. fats (g)                      | 18       | 12                                                           | 18            | 12                                                           |
| Carbs (g)                          | 46       | 30                                                           | 46            | 30                                                           |
| Sugars (g)                         | 45       | 29                                                           | 31            | 20                                                           |
| Polyols (g)                        | 0        | 0                                                            | 12            | 8                                                            |
| Fibre (g)                          | 8        | 5                                                            | 8             | 5                                                            |
| Proteins (g)                       | 5        | 3                                                            | 5             | 3                                                            |
| Salt (mg)                          | 5        | 3                                                            | 8             | 5                                                            |
| <b>Honey ball breakfast cereal</b> | Per 100g | Per portion<br>(60 g of cereals + 125 ml<br>(121 g) of milk) | Per 100g      | Per portion<br>(60 g of cereals + 125 ml<br>(121 g) of milk) |
| Energy (kcal)                      | 173      | 320                                                          | 153           | 283                                                          |
| Energy (kJ)                        | 731.2    | 1353.8                                                       | 641.7         | 1187.2                                                       |
| Fats (g)                           | 3.26     | 6.03                                                         | 3.16          | 5.84                                                         |
| Sat. fats (g)                      | 1.64     | 3.04                                                         | 1.63          | 3.01                                                         |
| Carbs (g)                          | 31.17    | 57.66                                                        | 25.59         | 47.33                                                        |

---

|              |       |       |      |       |
|--------------|-------|-------|------|-------|
| Sugars (g)   | 12.03 | 22.26 | 5.02 | 9.28  |
| Polyols (g)  | 0     | 0     | 4.86 | 9.00  |
| Fibre (g)    | 0.86  | 1.60  | 6.64 | 12.28 |
| Proteins (g) | 4.38  | 8.11  | 4.21 | 7.79  |
| Salt (mg)    | 0.35  | 0.64  | 0.33 | 0.60  |
